# Supplementary material
Source: publisher site journal article supplement (https://www.dovepress.com/article/332949)
Supplement: Supplementary file 1 [file get_supplementary_file.php]

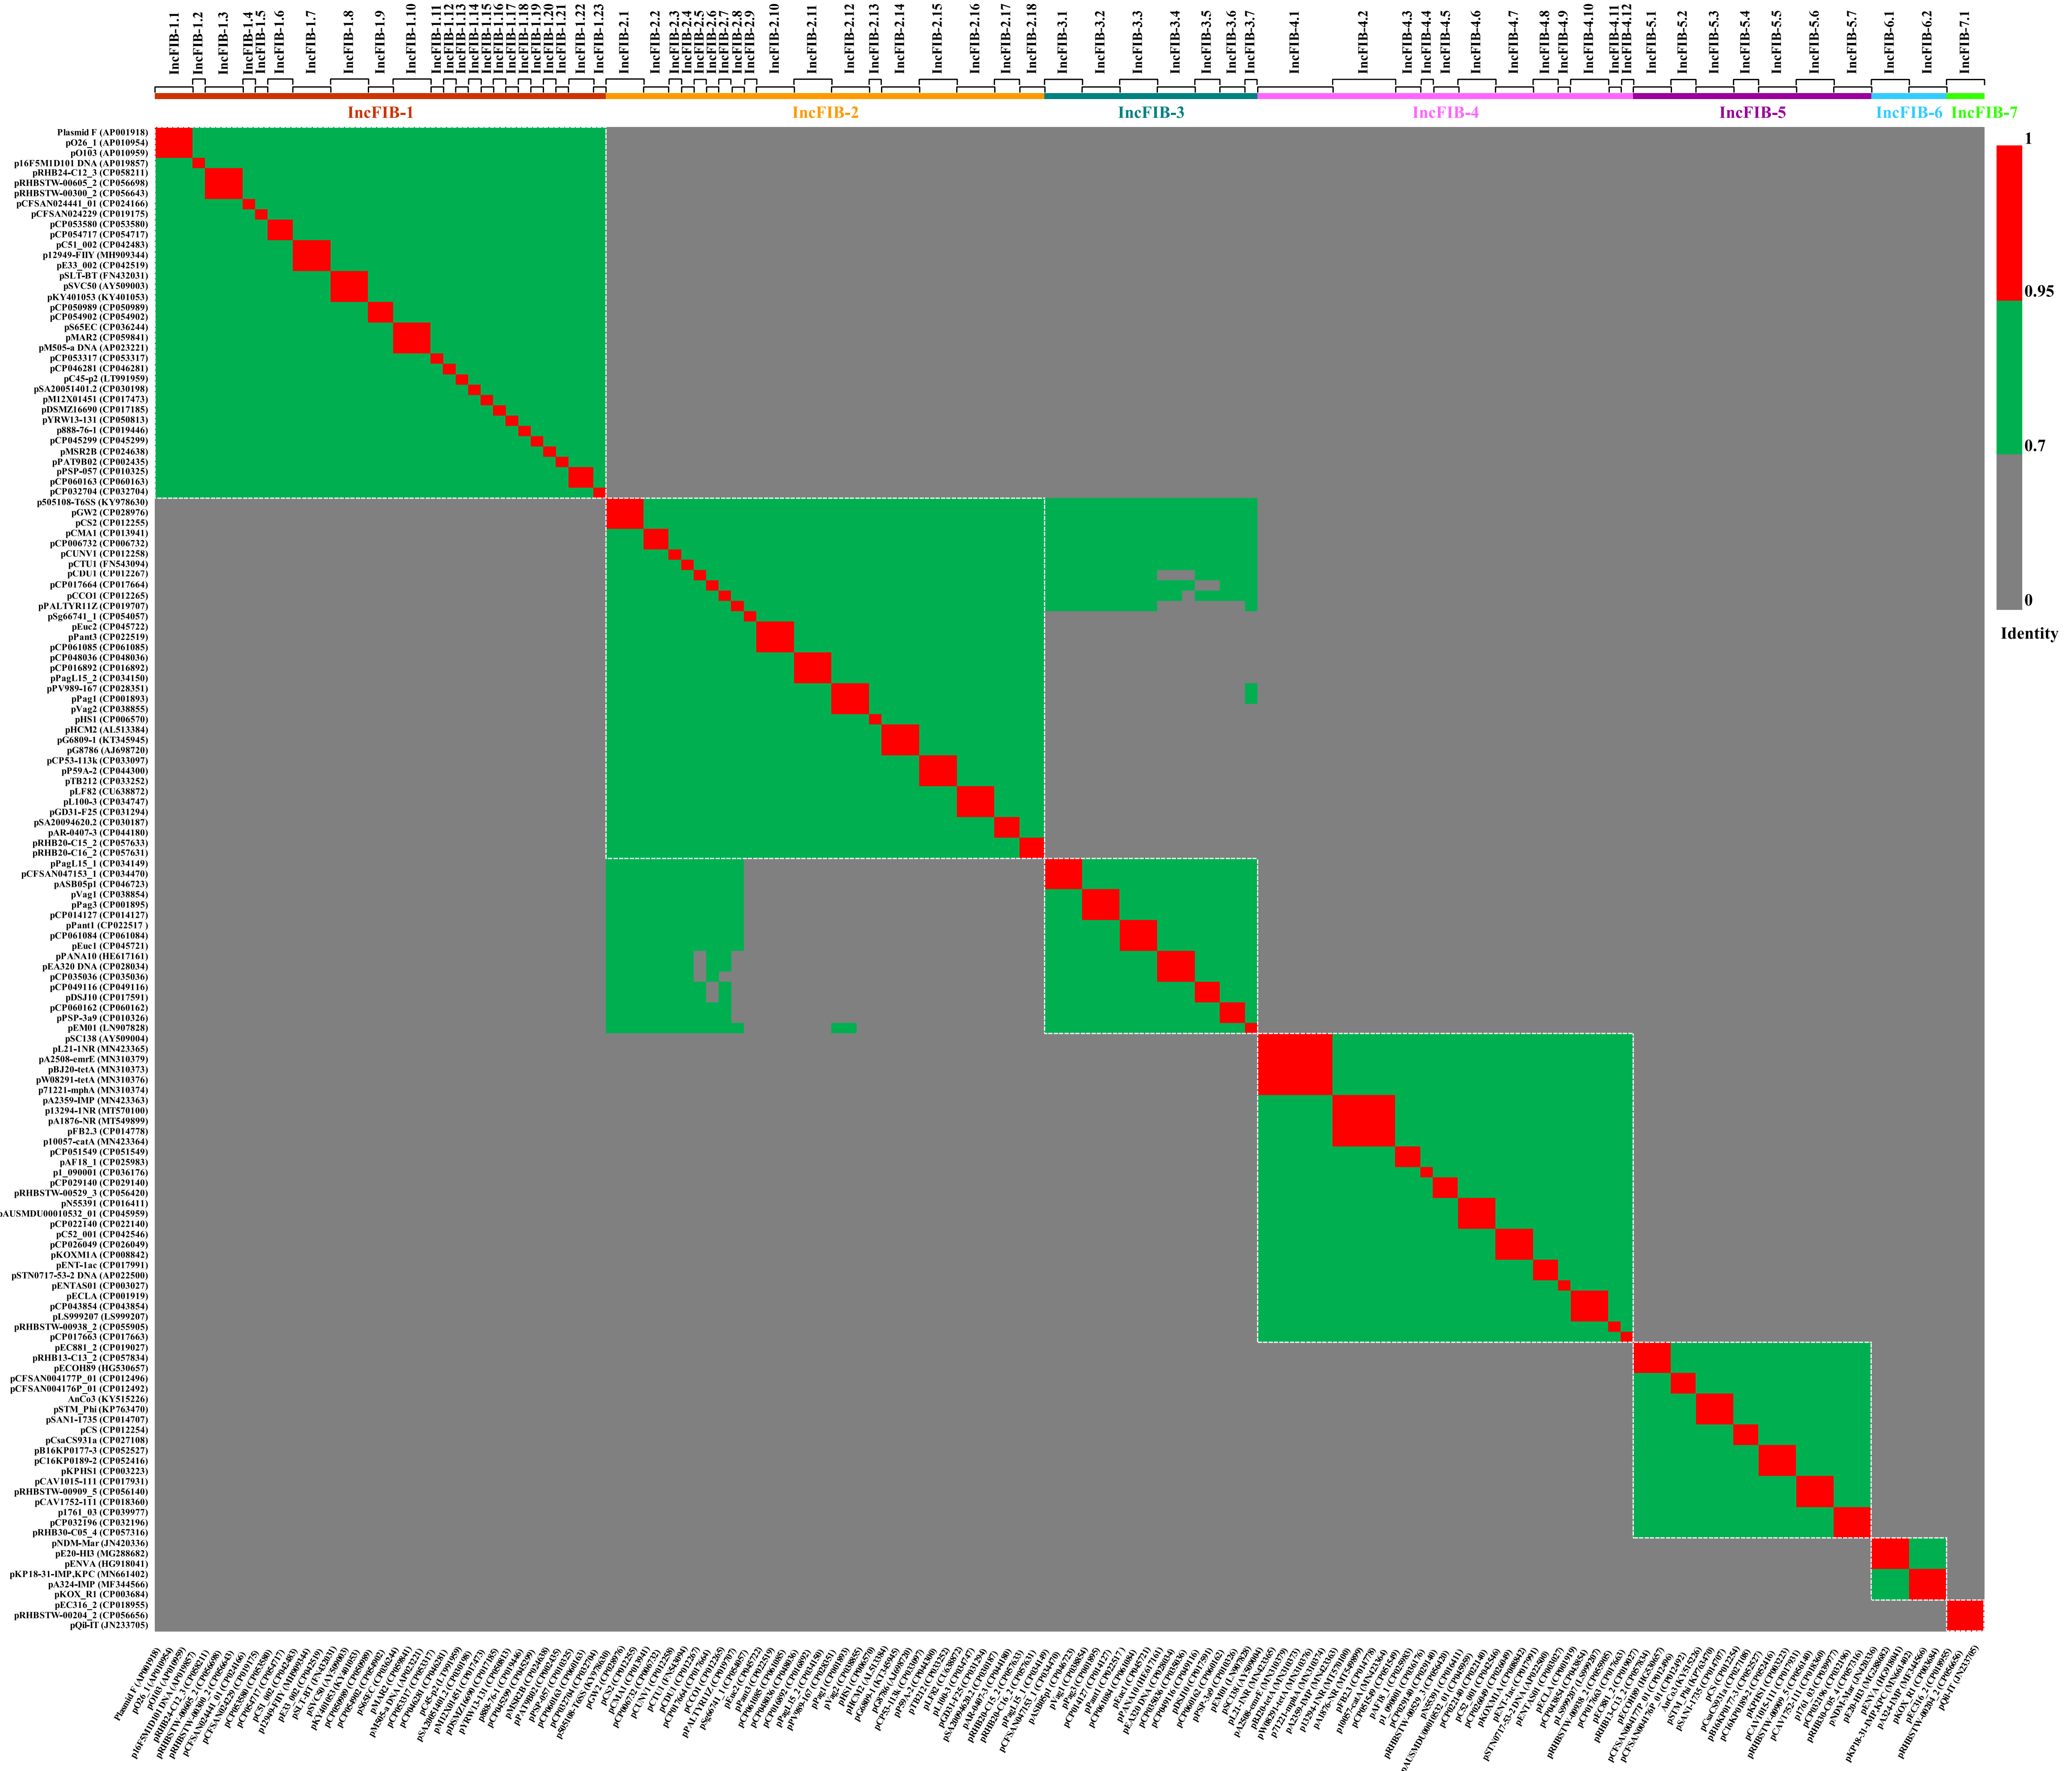

Figure S1 A heatmap of pairwise comparison of *repB*<sub>IncFIB</sub> sequences.  
 Notes: The original data are shown in Table S3.



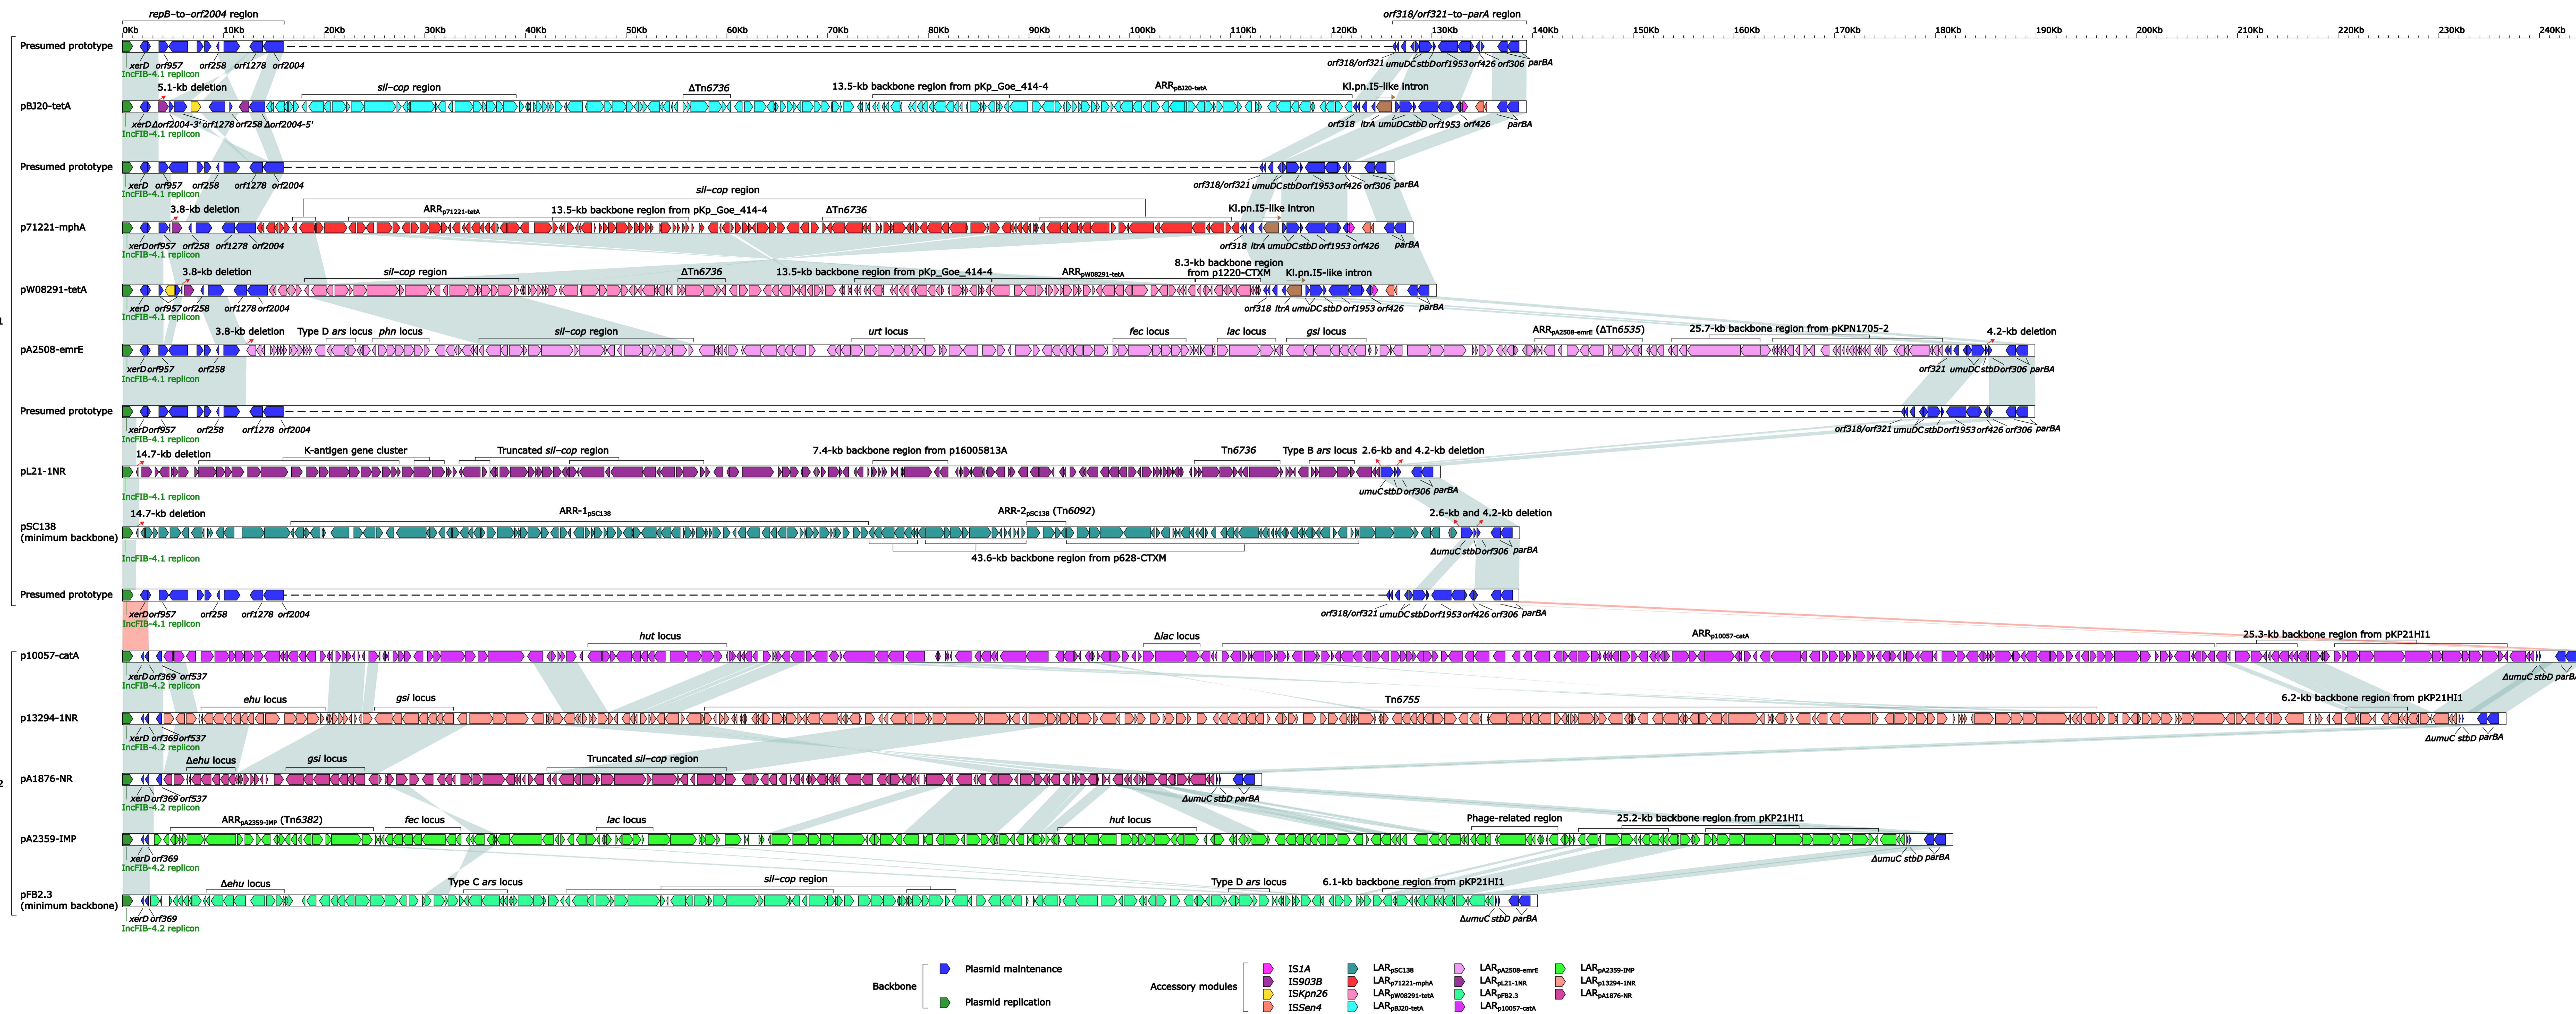

Figure S2 Linear comparison of IncFIB-4 single-replicon plasmids.

Notes: Genes are denoted by arrows. Genes, MGEs and other features are colored based on their functional classification.

Shading in light blue denotes regions of homology (nucleotide identity  $\geq 95\%$ ), light red (nucleotide identity  $< 95\%$ ).



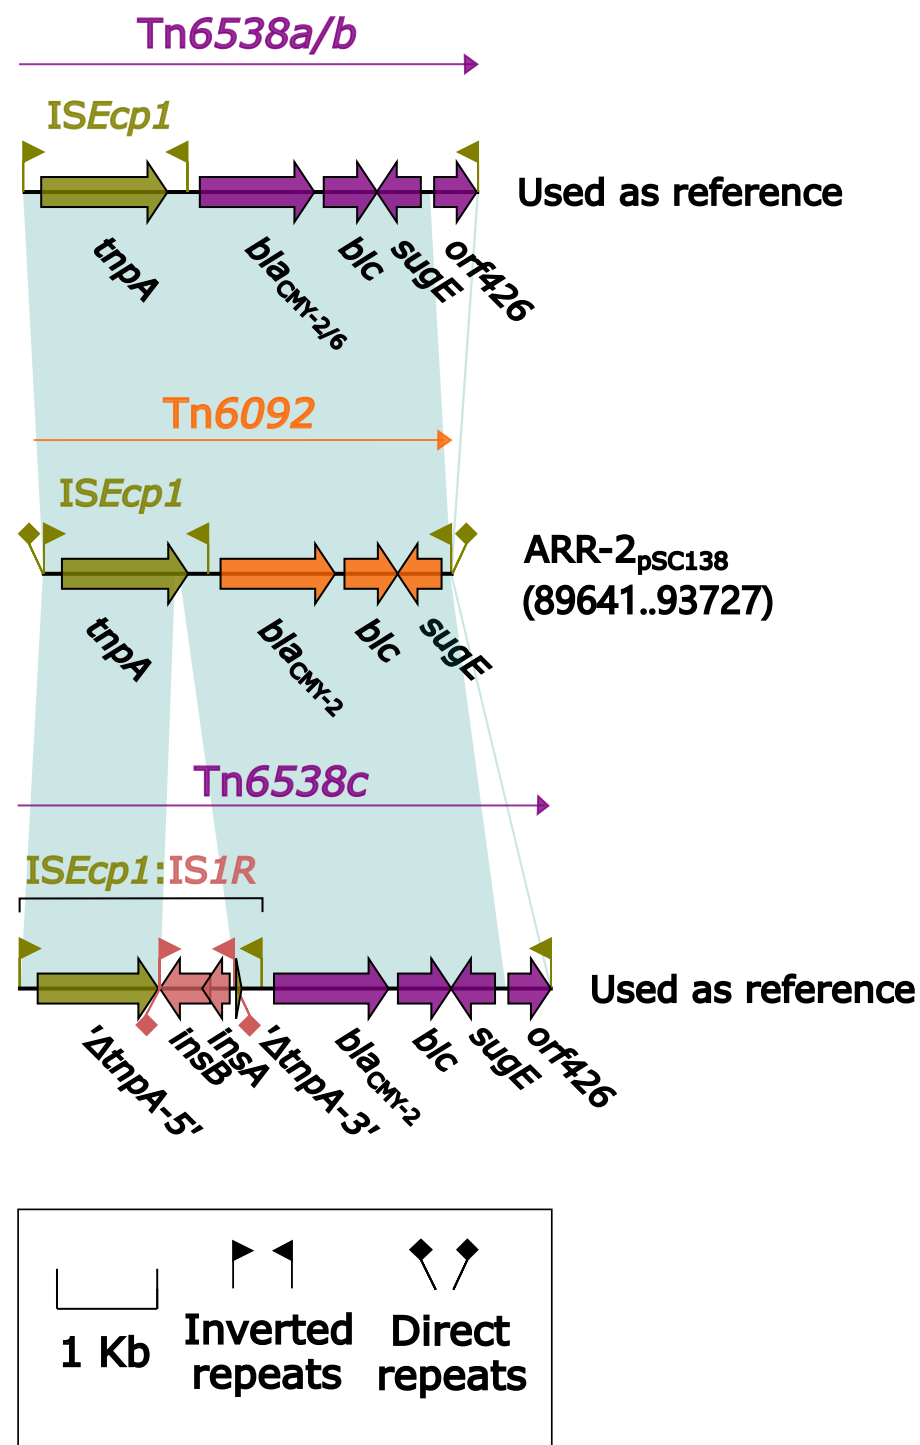

## Figure S3 Organization of *ARR-2<sub>pSC138</sub>*, and comparison to related regions.

Notes: Genes are denoted by arrows. Genes, MGEs and other features are colored based on their functional classification.

Shading denotes regions of homology (nucleotide identity  $\geq 95\%$ ). Numbers in brackets indicate nucleotide positions within corresponding plasmids. Accession numbers of *Tn6538a/b/c*<sup>58</sup> used as reference are MF344573, MN310375, and MN310370, respectively.

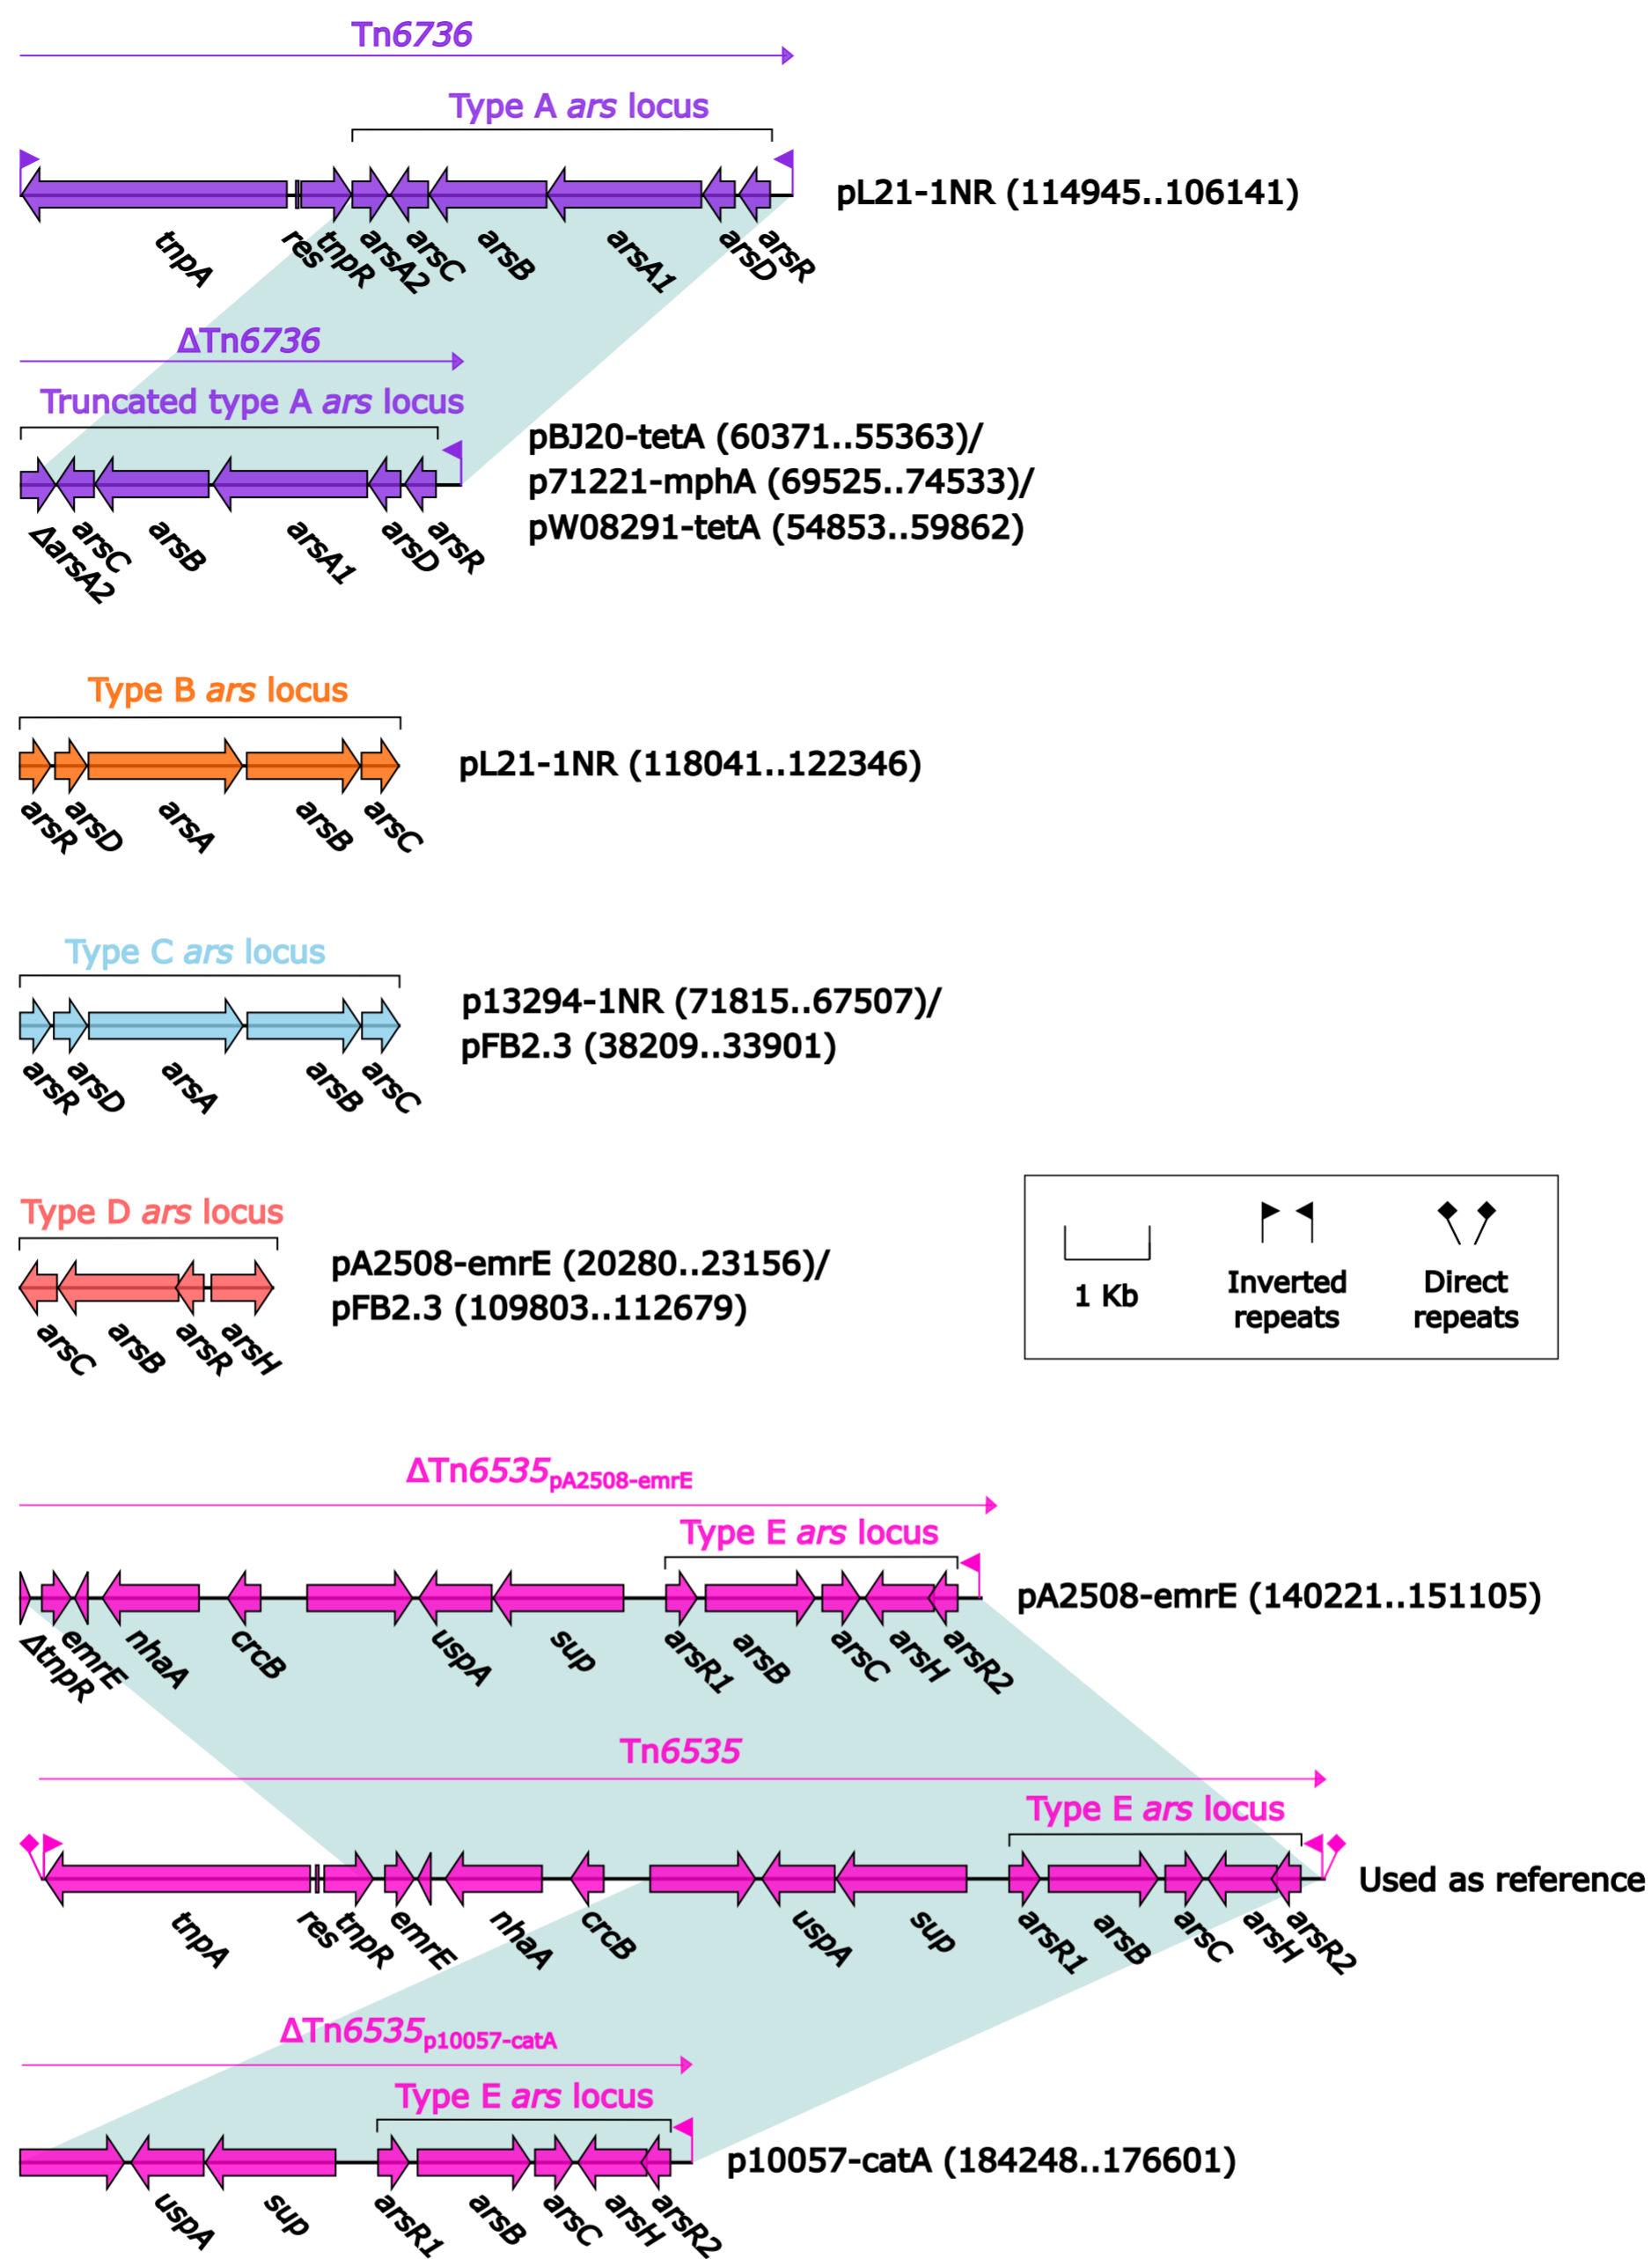

**Figure S4 Organization of *ars* loci and their surrounding regions, and comparison to related regions.**

**Notes:** Genes are denoted by arrows. Genes, MGEs and other features are colored based on their functional classification. Shading denotes regions of homology (nucleotide identity  $\geq 95\%$ ). Numbers in brackets indicate nucleotide positions within corresponding plasmids. Accession number of Tn6535<sup>49</sup> used as reference is CP009706.

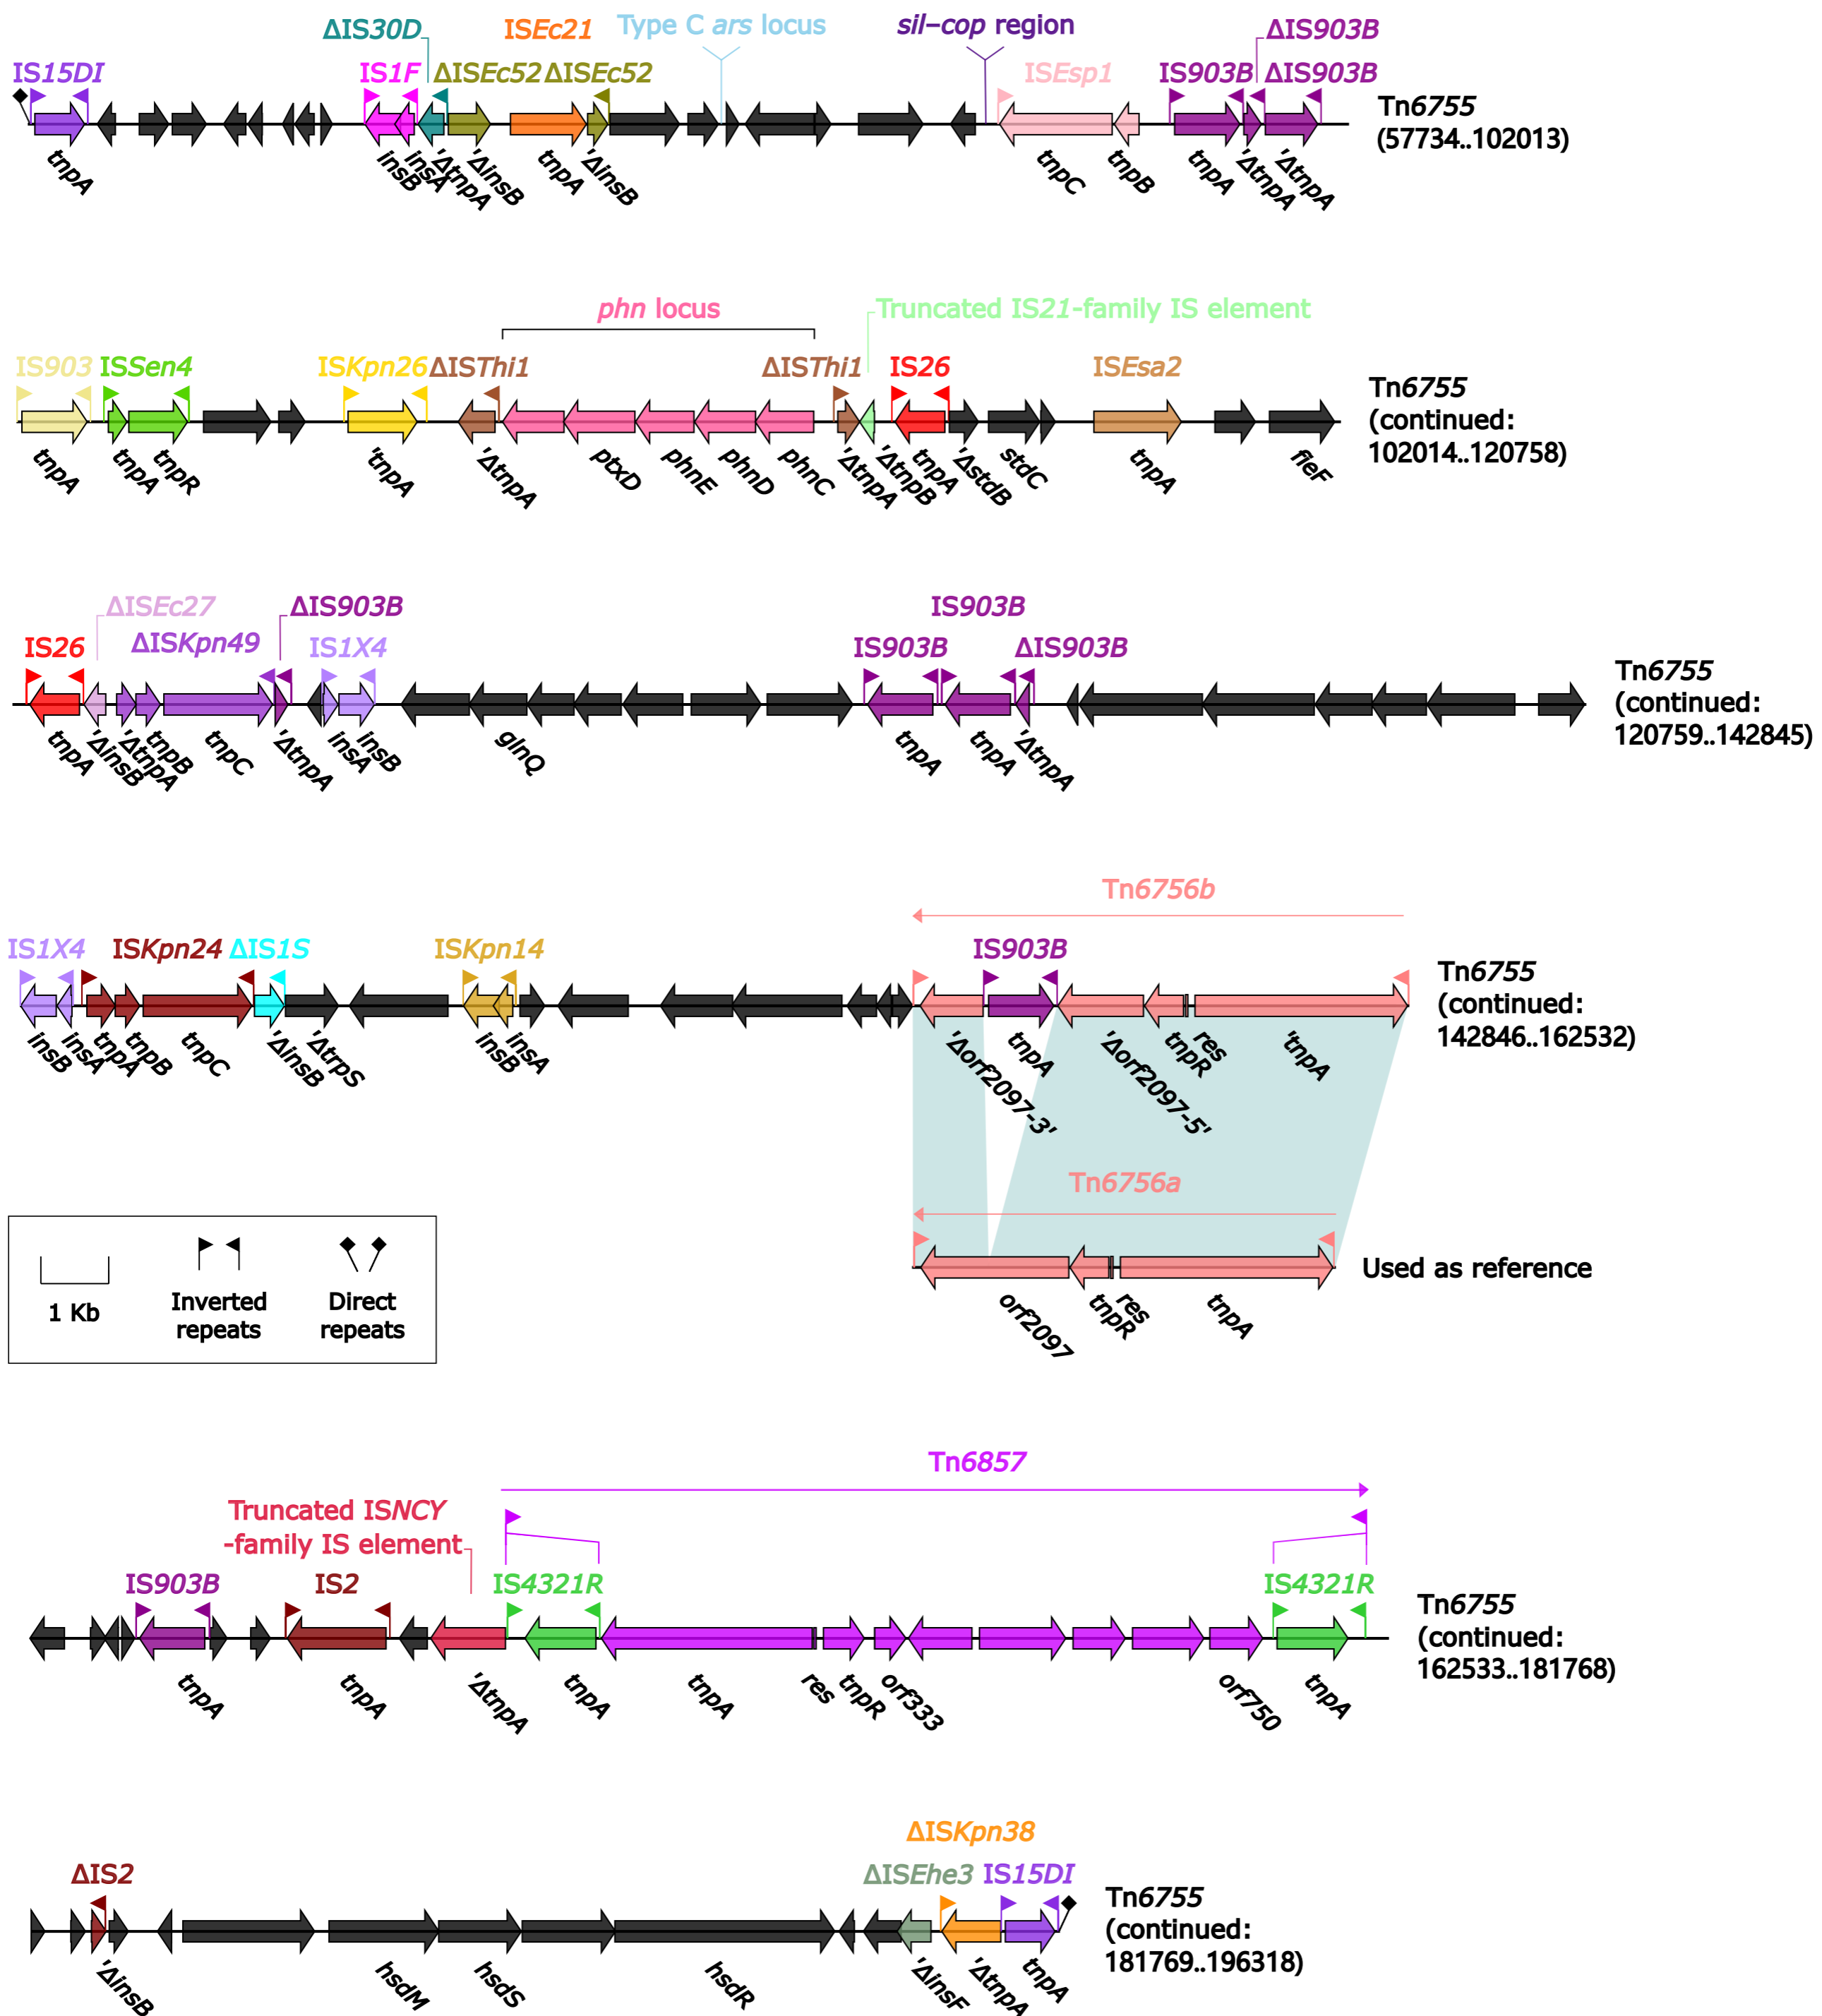

**Figure S5 Organization of Tn6755<sub>p13294-1NR</sub>, and comparison to related region.**  
**Notes: Genes are denoted by arrows. Genes, MGEs and other features are colored based on their functional classification.**  
**Shading denotes regions of homology (nucleotide identity  $\geq 95\%$ ). Numbers in brackets indicate nucleotide positions within corresponding plasmids.**  
**Accession number of Tn6756a used as reference is CP043513.**

**Table S1. Major features of bacterial strains**

| <b>Isolate</b> | <b>Bacterium</b>               | <b>City</b> | <b>Hospital</b> | <b>Specimen</b> | <b>Year</b> |
|----------------|--------------------------------|-------------|-----------------|-----------------|-------------|
| BJ20           | <i>Klebsiella pneumoniae</i>   | Beijing     | H01             | un-known        | 2017        |
| 71221          | <i>K. pneumoniae</i>           | Beijing     | H02             | Urine           | 2016        |
| 08291          | <i>K. pneumoniae</i>           | Zhejiang    | H03             | Sputum          | 2015        |
| A2508          | <i>K. quasipneumoniae</i>      | Hainan      | H04             | un-known        | 2014        |
| L21            | <i>Leclercia adcarboxglata</i> | Guangdong   | H05             | Bile            | 2018        |
| 10057          | <i>K. pneumoniae</i>           | Beijing     | H02             | Blood           | 2012        |
| 13294          | <i>K. quasipneumoniae</i>      | Anhui       | H06             | Blood           | 2013        |
| A1876          | <i>K. quasipneumoniae</i>      | Hunan       | H07             | un-known        | 2014        |
| A2359          | <i>K. pneumoniae</i>           | Hunan       | H08             | Sputum          | 2014        |

**Table S2. General features of the 11 IncFIB single-replicon plasmids**

| IncFIB subtype | Plasmid      | Accession number | Reference  | Total length (bp) | Total number of ORFs | Mean G+C content, % | Backbone length (bp) | LAR length (bp) | Location | Isolate                                      |
|----------------|--------------|------------------|------------|-------------------|----------------------|---------------------|----------------------|-----------------|----------|----------------------------------------------|
| IncFIB-4.1     | pBJ20-tetA   | MN310373         | This study | 139,389           | 146                  | 51.9                | 22,926               | 107,982         | China    | <i>Klebsiella pneumoniae</i><br><b>BJ20</b>  |
|                | p71221-mpH   | MN310374         | This study | 128,170           | 134                  | 51.9                | 24,258               | 97,689          | China    | <i>K. pneumoniae</i> 71221                   |
|                | pW08291-tetA | MN310376         | This study | 130,483           | 135                  | 51.9                | 24,253               | 112,616         | China    | <i>K. Pneumoniae</i><br><b>W08291</b>        |
|                | pA2508-emrE  | MN310379         | This study | 189,898           | 194                  | 52.6                | 21,176               | 168,722         | China    | <i>K. quasipneumoniae</i><br><b>A2508</b>    |
|                | pL21-1NR     | MN423365         | This study | 130,867           | 123                  | 49.7                | 7,290                | 123,577         | China    | <i>Leclercia adcarboxglata</i><br><b>L21</b> |
|                | pSC138       | AY509004         | 57         | 138,742           | 135                  | 51.3                | 7,164                | 131,578         | China    | <i>Salmonella enterica</i><br><b>SC138</b>   |
| IncFIB-4.2     | p10057-catA  | MN423364         | This study | 244,456           | 219                  | 51.6                | 8,818                | 235,638         | China    | <i>K. pneumoniae</i> <b>10057</b>            |
|                | p13294-1NR   | MT549899         | This study | 236,698           | 212                  | 50.1                | 8,735                | 227,963         | China    | <i>K. quasipneumoniae</i><br><b>13294</b>    |
|                | pA1876-NR    | MT570100         | This study | 113,128           | 101                  | 50.4                | 8,566                | 104,562         | China    | <i>K. quasipneumoniae</i><br><b>A1876</b>    |
|                | pA2359-IMP   | MN423363         | This study | 181,765           | 161                  | 51.8                | 7,688                | 174,077         | China    | <i>K. pneumoniae</i> <b>A2359</b>            |
|                | pFB2.3       | CP014778         | un-known   | 140,505           | 130                  | 50.7                | 6,869                | 133,636         | Malaysia | <i>Pluralibacter gergoviae</i><br><b>FB2</b> |

pSC138 and pFB2.3 were derived from GenBank (last accessed Dec 01, 2019), while all the other plasmids were sequenced in this study.

**Table S3. Collection of IncFIB plasmids and *repB*<sub>IncFIB</sub> sequences**

| <b>IncFIB subtype</b> | <b>Plasmid</b>  | <b>Plasmid accession number</b> | <b>Host bacterium</b>        |
|-----------------------|-----------------|---------------------------------|------------------------------|
| IncFIB-1.1            | Plasmid F       | AP001918                        | <i>Escherichia coli</i>      |
| IncFIB-1.1            | pO26_1          | AP010954                        | <i>Escherichia coli</i>      |
| IncFIB-1.1            | pO103           | AP010959                        | <i>Escherichia coli</i>      |
| IncFIB-1.2            | p16F5M1D101 DNA | AP019857                        | <i>Escherichia coli</i>      |
| IncFIB-1.3            | pRHB24-C12_3    | CP058211                        | <i>Escherichia marmotae</i>  |
| IncFIB-1.3            | pRHBSTW-00605_2 | CP056698                        | <i>Escherichia coli</i>      |
| IncFIB-1.3            | pRHBSTW-00300_2 | CP056643                        | <i>Escherichia coli</i>      |
| IncFIB-1.4            | pCFSAN024441_01 | CP024166                        | <i>Salmonella enterica</i>   |
| IncFIB-1.5            | pCFSAN024229    | CP019175                        | <i>Salmonella enterica</i>   |
| IncFIB-1.6            | pCP053580       | CP053580                        | <i>Salmonella enterica</i>   |
| IncFIB-1.6            | pCP054717       | CP054717                        | <i>Salmonella enterica</i>   |
| IncFIB-1.7            | pC51_002        | CP042483                        | <i>Klebsiella pneumoniae</i> |
| IncFIB-1.7            | p12949-FIIY     | MH909344                        | <i>Enterobacter cloacae</i>  |
| IncFIB-1.7            | pE33_002        | CP042519                        | <i>Citrobacter freundii</i>  |
| IncFIB-1.8            | pSLT-BT         | FN432031                        | <i>Salmonella enterica</i>   |
| IncFIB-1.8            | pSVC50          | AY509003                        | <i>Salmonella enterica</i>   |
| IncFIB-1.8            | pKY401053       | KY401053                        | <i>Salmonella enterica</i>   |
| IncFIB-1.9            | pCP050989       | CP050989                        | <i>Salmonella enterica</i>   |
| IncFIB-1.9            | pCP054902       | CP054902                        | <i>Salmonella enterica</i>   |
| IncFIB-1.10           | pS65EC          | CP036244                        | <i>Escherichia coli</i>      |
| IncFIB-1.10           | pMAR2           | CP059841                        | <i>Escherichia coli</i>      |
| IncFIB-1.10           | pM505-a DNA     | AP023221                        | <i>Escherichia coli</i>      |
| IncFIB-1.11           | pCP053317       | CP053317                        | <i>Salmonella enterica</i>   |



|             |               |          |                                   |
|-------------|---------------|----------|-----------------------------------|
| IncFIB-1.12 | pCP046281     | CP046281 | <i>Salmonella enterica</i>        |
| IncFIB-1.13 | pC45-p2       | LT991959 | <i>Enterobacter cloacae</i>       |
| IncFIB-1.14 | pSA20051401.2 | CP030198 | <i>Salmonella enterica</i>        |
| IncFIB-1.15 | pM12X01451    | CP017473 | <i>Enterobacter cloacae</i>       |
| IncFIB-1.16 | pDSMZ16690    | CP017185 | <i>Enterobacter cloacae</i>       |
| IncFIB-1.17 | pYRW13-131    | CP050813 | <i>Yokenella regensburgei</i>     |
| IncFIB-1.18 | p888-76-1     | CP019446 | <i>Kosakonia cowanii</i>          |
| IncFIB-1.19 | pCP045299     | CP045299 | <i>Kosakonia arachidis</i>        |
| IncFIB-1.20 | pMSR2B        | CP024638 | <i>Pantoea</i> sp.                |
| IncFIB-1.21 | pPAT9B02      | CP002435 | <i>Pantoea</i> sp.                |
| IncFIB-1.22 | pPSP-057      | CP010325 | <i>Pantoea</i> sp.                |
| IncFIB-1.22 | pCP060163     | CP060163 | <i>Acinetobacter venetianus</i>   |
| IncFIB-1.23 | pCP032704     | CP032704 | <i>Pantoea dispersa</i>           |
| IncFIB-2.1  | p505108-T6SS  | KY978630 | <i>Cronobacter sakazakii</i>      |
| IncFIB-2.1  | pGW2          | CP028976 | <i>Cronobacter sakazakii</i>      |
| IncFIB-2.1  | pCS2          | CP012255 | <i>Cronobacter sakazakii</i>      |
| IncFIB-2.2  | pCMA1         | CP013941 | <i>Cronobacter malonaticus</i>    |
| IncFIB-2.2  | pCP006732     | CP006732 | <i>Cronobacter malonaticus</i>    |
| IncFIB-2.3  | pCUNV1        | CP012258 | <i>Cronobacter universalis</i>    |
| IncFIB-2.4  | pCTU1         | FN543094 | <i>Cronobacter turicensis</i>     |
| IncFIB-2.5  | pCDU1         | CP012267 | <i>Cronobacter dublinensis</i>    |
| IncFIB-2.6  | pCP017664     | CP017664 | <i>Cronobacter</i> sp.            |
| IncFIB-2.7  | pCCO1         | CP012265 | <i>Cronobacter condimenti</i>     |
| IncFIB-2.8  | pPALTYR11Z    | CP019707 | <i>Pantoea alhagi</i>             |
| IncFIB-2.9  | pSg66741_1    | CP054057 | <i>Scandinavium goeteborgense</i> |

|             |                |          |                             |
|-------------|----------------|----------|-----------------------------|
| IncFIB-2.10 | pEuc2          | CP045722 | <i>Pantoea eucalypti</i>    |
| IncFIB-2.10 | pPant3         | CP022519 | <i>Pantoea vagans</i>       |
| IncFIB-2.10 | pCP061085      | CP061085 | <i>Pantoea</i> sp.          |
| IncFIB-2.11 | pCP048036      | CP048036 | <i>Pantoea agglomerans</i>  |
| IncFIB-2.11 | pCP016892      | CP016892 | <i>Pantoea agglomerans</i>  |
| IncFIB-2.11 | pPagL15_2      | CP034150 | <i>Pantoea agglomerans</i>  |
| IncFIB-2.12 | pPV989-167     | CP028351 | <i>Pantoea vagans</i>       |
| IncFIB-2.12 | pPag1          | CP001893 | <i>Pantoea vagans</i>       |
| IncFIB-2.12 | pVag2          | CP038855 | <i>Pantoea vagans</i>       |
| IncFIB-2.13 | pHS1           | CP006570 | <i>Sodalis praecaptivus</i> |
| IncFIB-2.14 | pHCM2          | AL513384 | <i>Salmonella enterica</i>  |
| IncFIB-2.14 | pG6809-1       | KT345945 | <i>Enterobacter cloacae</i> |
| IncFIB-2.14 | pG8786         | AJ698720 | <i>Yersinia pestis</i>      |
| IncFIB-2.15 | pCP53-113k     | CP033097 | <i>Escherichia coli</i>     |
| IncFIB-2.15 | pP59A-2        | CP044300 | <i>Escherichia coli</i>     |
| IncFIB-2.15 | pTB212         | CP033252 | <i>Escherichia coli</i>     |
| IncFIB-2.16 | pLF82          | CU638872 | <i>Escherichia coli</i>     |
| IncFIB-2.16 | pL100-3        | CP034747 | <i>Escherichia coli</i>     |
| IncFIB-2.16 | pGD31-F25      | CP031294 | <i>Escherichia coli</i>     |
| IncFIB-2.17 | pSA20094620.2  | CP030187 | <i>Salmonella enterica</i>  |
| IncFIB-2.17 | pAR-0407-3     | CP044180 | <i>Salmonella enterica</i>  |
| IncFIB-2.18 | pRHB20-C15_2   | CP057633 | <i>Citrobacter</i> sp.      |
| IncFIB-2.18 | pRHB20-C16_2   | CP057631 | <i>Citrobacter</i> sp.      |
| IncFIB-3.1  | pPagL15_1      | CP034149 | <i>Pantoea agglomerans</i>  |
| IncFIB-3.1  | pCFSAN047153_1 | CP034470 | <i>Pantoea agglomerans</i>  |

|            |              |          |                                   |
|------------|--------------|----------|-----------------------------------|
| IncFIB-3.1 | pASB05p1     | CP046723 | <i>Pantoea agglomerans</i>        |
| IncFIB-3.2 | pVag1        | CP038854 | <i>Pantoea vagans</i>             |
| IncFIB-3.2 | pPag3        | CP001895 | <i>Pantoea vagans</i>             |
| IncFIB-3.2 | pCP014127    | CP014127 | <i>Pantoea vagans</i>             |
| IncFIB-3.3 | pPant1       | CP022517 | <i>Pantoea vagans</i>             |
| IncFIB-3.3 | pCP061084    | CP061084 | <i>Pantoea</i> sp.                |
| IncFIB-3.3 | pEuc1        | CP045721 | <i>Pantoea eucalypti</i>          |
| IncFIB-3.4 | pPANA10      | HE617161 | <i>Pantoea ananatis</i>           |
| IncFIB-3.4 | pEA320 DNA   | CP028034 | <i>Pantoea ananatis</i>           |
| IncFIB-3.4 | pCP035036    | CP035036 | <i>Pantoea ananatis</i>           |
| IncFIB-3.5 | pCP049116    | CP049116 | <i>Pantoea stewartii</i>          |
| IncFIB-3.5 | pDSJ10       | CP017591 | <i>Pantoea stewartii</i>          |
| IncFIB-3.6 | pCP060162    | CP060162 | <i>A. venetianus</i>              |
| IncFIB-3.6 | pPSP-3a9     | CP010326 | <i>Pantoea</i> sp.                |
| IncFIB-3.7 | pEM01        | LN907828 | <i>Erwinia</i> sp.                |
| IncFIB-4.1 | pSC138       | AY509004 | <i>Salmonella enterica</i>        |
| IncFIB-4.1 | pL21-1NR     | MN423365 | <i>Leclercia adcarboxglata</i>    |
| IncFIB-4.1 | pA2508-emrE  | MN310379 | <i>Klebsiella quasipneumoniae</i> |
| IncFIB-4.1 | pBJ20-tetA   | MN310373 | <i>Klebsiella pneumoniae</i>      |
| IncFIB-4.1 | pW08291-tetA | MN310376 | <i>Klebsiella pneumoniae</i>      |
| IncFIB-4.1 | p71221-mphA  | MN310374 | <i>Klebsiella pneumoniae</i>      |
| IncFIB-4.2 | pA2359-IMP   | MN423363 | <i>Klebsiella pneumoniae</i>      |
| IncFIB-4.2 | p13294-1NR   | MT570100 | <i>Klebsiella quasipneumoniae</i> |
| IncFIB-4.2 | pA1876-NR    | MT549899 | <i>Klebsiella quasipneumoniae</i> |
| IncFIB-4.2 | pFB2.3       | CP014778 | <i>Pluralibacter gergoviae</i>    |



|             |                    |          |                                     |
|-------------|--------------------|----------|-------------------------------------|
| IncFIB-4.2  | p10057-catA        | MN423364 | <i>Klebsiella pneumoniae</i>        |
| IncFIB-4.3  | pCP051549          | CP051549 | <i>Phytobacter diazotrophicus</i>   |
| IncFIB-4.3  | pAF18_1            | CP025983 | <i>Enterobacteriaceae bacterium</i> |
| IncFIB-4.4  | p1_090001          | CP036176 | <i>Klebsiella huaxiensis</i>        |
| IncFIB-4.5  | pCP029140          | CP029140 | <i>Klebsiella michiganensis</i>     |
| IncFIB-4.5  | pRHBSTW-00529_3    | CP056420 | <i>Klebsiella oxytoca</i>           |
| IncFIB-4.6  | pN55391            | CP016411 | <i>Salmonella enterica</i>          |
| IncFIB-4.6  | pAUSMDU00010532_01 | CP045959 | <i>Salmonella enterica</i>          |
| IncFIB-4.6  | pCP022140          | CP022140 | <i>Salmonella enterica</i>          |
| IncFIB-4.7  | pC52_001           | CP042546 | <i>Klebsiella michiganensis</i>     |
| IncFIB-4.7  | pCP026049          | CP026049 | <i>Raoultella planticola</i>        |
| IncFIB-4.7  | pK0XM1A            | CP008842 | <i>Klebsiella michiganensis</i>     |
| IncFIB-4.8  | pENT-1ac           | CP017991 | <i>Enterobacter cloacae</i>         |
| IncFIB-4.8  | pSTN0717-53-2 DNA  | AP022500 | <i>Enterobacter kobei</i>           |
| IncFIB-4.9  | pENTAS01           | CP003027 | <i>Enterobacter soli</i>            |
| IncFIB-4.10 | pECLA              | CP001919 | <i>Enterobacter cloacae</i>         |
| IncFIB-4.10 | pCP043854          | CP043854 | <i>Enterobacter hormaechei</i>      |
| IncFIB-4.10 | pLS999207          | LS999207 | <i>Enterobacter hormaechei</i>      |
| IncFIB-4.11 | pRHBSTW-00938_2    | CP055905 | <i>Klebsiella aerogenes</i>         |
| IncFIB-4.12 | pCP017663          | CP017663 | <i>Cronobacter</i> sp.              |
| IncFIB-5.1  | pEC881_2           | CP019027 | <i>Escherichia coli</i>             |
| IncFIB-5.1  | pRHB13-C13_2       | CP057834 | <i>Escherichia coli</i>             |
| IncFIB-5.1  | pECOH89            | HG530657 | <i>Escherichia coli</i>             |
| IncFIB-5.2  | pCFSAN004177P_01   | CP012496 | <i>Escherichia coli</i>             |
| IncFIB-5.2  | pCFSAN004176P_01   | CP012492 | <i>Escherichia coli</i>             |

|            |                  |          |                                   |
|------------|------------------|----------|-----------------------------------|
| IncFIB-5.3 | AnCo3            | KY515226 | <i>Salmonella enterica</i>        |
| IncFIB-5.3 | pSTM_Phi         | KP763470 | <i>Salmonella enterica</i>        |
| IncFIB-5.3 | pSAN1-1735       | CP014707 | <i>Salmonella enterica</i>        |
| IncFIB-5.4 | pCS              | CP012254 | <i>Cronobacter sakazakii</i>      |
| IncFIB-5.4 | pCsaCS931a       | CP027108 | <i>Cronobacter sakazakii</i>      |
| IncFIB-5.5 | pB16KP0177-3     | CP052527 | <i>Klebsiella pneumoniae</i>      |
| IncFIB-5.5 | pC16KP0189-2     | CP052416 | <i>Klebsiella pneumoniae</i>      |
| IncFIB-5.5 | pKPHS1           | CP003223 | <i>Klebsiella pneumoniae</i>      |
| IncFIB-5.6 | pCAV1015-111     | CP017931 | <i>Klebsiella oxytoca</i>         |
| IncFIB-5.6 | pRHBSTW-00909_5  | CP056140 | <i>Klebsiella michiganensis</i>   |
| IncFIB-5.6 | pCAV1752-111     | CP018360 | <i>Klebsiella oxytoca</i>         |
| IncFIB-5.7 | p1761_03         | CP039977 | <i>Klebsiella pneumoniae</i>      |
| IncFIB-5.7 | pCP032196        | CP032196 | <i>Klebsiella pneumoniae</i>      |
| IncFIB-5.7 | pRHB30-C05_4     | CP057316 | <i>Klebsiella pneumoniae</i>      |
| IncFIB-6.1 | pNDM-Mar         | JN420336 | <i>Klebsiella pneumoniae</i>      |
| IncFIB-6.1 | pE20-HI3         | MG288682 | <i>Klebsiella aerogenes</i>       |
| IncFIB-6.1 | pENVA            | HG918041 | <i>Klebsiella pneumoniae</i>      |
| IncFIB-6.2 | pKP18-31-IMP,KPC | MN661402 | <i>Klebsiella quasipneumoniae</i> |
| IncFIB-6.2 | pA324-IMP        | MF344566 | <i>Klebsiella michiganensis</i>   |
| IncFIB-6.2 | pKOX_R1          | CP003684 | <i>Enterobacter cloacae</i>       |
| IncFIB-7.1 | pEC316_2         | CP018955 | <i>Escherichia coli</i>           |
| IncFIB-7.1 | pRHBSTW-00204_2  | CP056656 | <i>Escherichia coli</i>           |
| IncFIB-7.1 | pQil-IT          | JN233705 | <i>Klebsiella pneumoniae</i>      |

*rep*<sub>IncFIB</sub> sequences of the corresponding plasmids were listed below:

>Plasmid F (AP001918)

GTGGATAAGTTCGTCGGGTGAGCTGGTGACACTGACACCAAACAATAACAACACCGTACAACCTGTGGCGCTGATGCGTCTGGGCGTTTTTGTACCGACCCTTA

AATCACTGAAGAACAGTAAAAAATACACTGTCACGTAAGTACTGATGCCACGGAAGAGCTGACTCGTCTTCCCTGGCCCGTGCTGAGGGATTGATAAGGTTGAGATCACCGGCCCGCCTGGATATGGATAACGATTTCAAGACCTGGGTGGGGATCATTATTCTTTGCCCGCCATAACGTGATTGGTGACAAAGTTGAACTGCCTTTTGTGAGTTTGCAAACTGTGTGGTATACTTCAAGCCAGTCATCCCGCAGGCTGCGTGAGCGCATCAGCCCTTCCCTGAAGCGCATTGCCGGTACCGGTATCTCGTTTTCCCGTACCGATGAGAAGCACACCCGGGAATACATCACCCATCTGGTACAGTCAGCCTACTACGATACTGAGCGGGATATTGTTTCAGTTACAGGCTGATCCCCGTCTGTTTGAAGTGTACCAGTTTGACAGAAAAGTCCTTCTCCAGCTTAAGGCGATTAATGCCCTGAAGCGACGGGAGTCCGCCAGGCACTCTACACCTTTATAGAGAGCCTGCCCGGGATCCGGCACCGATATCGCTGGCGCGGCTGCGTGCACGCCTCAATCTGAAGTCTCCTGTATTTCCAGAACAGACGGTCAGACGGGCAATGGAGCAGTTGCGCGAGATTGGATATCTTGATTACACGGAGATCCAGCGGGGGCGGACAAAATTCTTCTGTATTACTACCGGCGTCCCCGGTTAAAAGCGCCGAATGATGAGAGTAAGGAAAATCCGTTGCCACCTTACCTGCGGAAAAAGTCAGTCCGGAGATGGCGGAGAACTTGCCTGCTTGAAAACTGGGCATCACACTGGATGACCTGGAAAACTCTTCAAATCCCGCTGA

>pO26\_1 (AP010954)

GTGGATAAGTTCGTCGGGTGAGCTGGTGACACTGACACCAACAATAACAACACCGTACAACCTGTGGCGCTGATGCGTCTGGGCGTTTTTGTACCGACCCTTAATCACTGAAGAACAGTAAAAAATACACTGTCACGTAAGTACTGATGCCACGGAAGAGCTGACACGTCTTCCCTGGCCCGTGCTGAGGGATTGATAAGGTTGAGATCACCGGCCCGCCTGGATATGGATAACGATTTCAAGACCTGGGTGGGAATCATTATTCTTTGCCCGCCATAACGTAATTGGTGACAAAGTTGAACTGCCTTTTGTGAGTTTGCAAACTGTGTGGTATACTTCAAGCCAGTCATCCCGCAGGCTGCGTGAGCGCATCAGCCCTTCCCTGAAACGCATTGCCGGTACCGGTATCTCCTTTTCCCGCACCGATGAGAAGCACACCCGGGAATATATCACCCATCTGGTACAGTCAGCCTACTACGATACTGAACGGGATATTGTTTCAGTTACAGGCTGATCCCCGCCTTTTTGAAGTGTACCAGTTTGACCGGAAAGTGCTGCTGCAGCTCAAGGCCATCAATGCCCTGAAGCGACGGGAGTCCGCCAGGCACTTTACACCTTTATAGAGAGCCTGCCCGGGATCCGGCACCGATATCGCTGGCGCGGCTGCGTGCCCGCTCAATCTGAAGTCTCCTGTATTTCCAGAACAGACGGTAGACGGGCAATGGAGCAGTTGCGCGAGATTGGATATCTTGATTACACGGAGATCCAGCGGGGGCGGACAAAATTCTTCTGTATTACTACCGGCGTCCCCGGTTAAAAGCGCCGAATGATGAGAGTAAGGAAAATCCGTTGCCACCTTACCTGCGGAAAAAGTCAGTCCGGAGATGGCGGAGAACTTGCCTGCTTGAAAACTGGGCATCACGCTGGATGACCTGGAAAACTCTTCAAATCCCGCTGA

>pO103 (AP010959)

GTGGATAAGTCTCCGGGTGAGCTGGTGACACTGACACCAACAATAACAACACCGTACAACCTGTGGCGCTGATGCGTCTGGGCGTCTTTGTACCGACCCTTAATCACTGAAGAACAGTAAAAAATACACTGTCACGTAAGTACTGATGCCACGGAAGAACTGACACGTCTTCCCTGGCCCGTGAGAGGGATTGATAAGGTTGAGATCACCGGCCCGGCTGGATATGGATAACGATTTCAAGACTTGGGTGGGGATCATTATTCTTTGCCCGCCATAACGTGACTGGTGACAAAGTTGAACTACCTTTTGTGAGTTTGCAAACTGTGTGGTATACTTCAAACCAGTCATCACGCAGGCTGCGTGAGCGCATCAGCCCTTCCCTGAAACGCATTGCCGGTACCGGTGATCTCCTTTTCCCGCACCGATGAGAAGCACACCCGGGAATACATCACTCATCTGGTACAGTCAGCCTACTACGATACTGAACGGGATATTGTTTCAGTTACAGG



CTGATCCCCGCCTTTTTGAACTGTACCAGTTTGACAGAAAAGTTCTTCTCCAGCTTAAGGCGATTAATGCCCTGAAGCGACGGGAGTCCGCCCAGGCACTCTA  
CACATTTATAGAGAGCCTGCCCCGGGATCCGGCACCGATATCGCTGGCGCGGCTGCGTGCACGCCTCAATCTGAAGTCTCCGGTATTTTCCCAGAACCAGACG  
GTCAGACGGGCAATGGAGCAATTGCGTGAGATTGGATATCTTGATTACACTGAGATCCAGCGGGGACGGACAAAACCTCTTCTGTATTCACTACCGGCGTCCCC  
GGTAAAAGCGCCGAATGATGAGAGTAAGGAAAATCCGTTGCCACCTTCACCTGCGGAAAAAGTCAGTCCGGAGATGGCGGAGAAGCTTGCCCTGCTTGAGA  
AACTGGGCATCACGCTGGATGACCTGGAAAACTCTTCAAATCCCGCTGA

>p16F5M1D101 DNA (AP019857)

GTGGATAAGTCCTCCGGTGAGCTGGTGACACTGACACCAAACAATAAACAACACTGTACAACCTGTGGTCTTGATGCGTCTTGGGGTGTGTTGTGCCGACCCTTA  
AGTCACTAAAGAACAGTAAAAAAAATACACTTGCACGCACCGATGCCACGGAAGAAGTACGCGCTCTTCCCTAGCCCCGGGCAGAGGGATTGATAAGGTTG  
AAATCACCGGCCCGACTGGATATGGATAACGATTTCAAACCTGGGTGGGGATCATTCAATCCTTTGCCCGTCATAATGTGATTGGTGATAAAGTTGAACTGC  
CTTTTGTGCAATTTGCAAACTGTGCGGTATACCTTCAAGCCAGTCATCGCGCAGGCTTCGTGAACGAATCAGTTCTTCCCTGAAGCGCATTGCCGGTACAGTG  
ATCTCGTTTTCCCGCACCGATGAGAAGCATACCCGGGAATACATCACCCATCTGGTACAGTCAGCCTACTACGATACTGAACGGGATATTGTTTACAGGCT  
GATCCCCGTCTGTTTGAAGTGTACCAGTTTGATAGAAAAGTGCTTCTTACAGCTTAAGGCGATTAATGCCCTGAAACGGCGGGAGTCTGCCAGGCTCTTTACAC  
CTTTATAGAAAAGTCTGCCGCGGGATCCGGCACCGATATCGCTGGCGCGGCTGCGGGCACGCCTCAATCTTAAATCTCCGGTATTCTCCCAGAACCAGACGGTCA  
GACGGGCAATGGAGCAGTTGCGCGAGATTGGATATCTTGATTACACGGAGATCCAGCGGGGGCGAACAAAATTCTTCTGTATTCACTACCGGCGTCCCCGGTT  
AAAAGCGCCGAATGATGAGAGTAAGGAAAATCCATTACCACTTTCACCTGCGGAAAAAGTCAGTTCGGAGATTGCGGAGAACTTGCCCTGCTTGAAAACT  
TGGCATCACGCTGAATGACTTGAAAACTCTTCAAATCTCGCTCAACATAA

>pRHB24-C12\_3 (CP058211)

GTGGATAAGTCCTCCGGTGAGCTGGTGACACTGACACCAAACAATAACAACACCGTACAGCCTGTGGCGCTGATGCGTCTTGGCGTCTTTGTACCCACCCTTA  
AGTCACTGAAGAACAGTAAAAAAAATACACTGTCACGTACCGATGCCACGGAAGAAGTACGCGCTCTTCTCTGGCACGGGCTGAAGGGTTTGATAAGGTTG  
AGATCACTGGCCCCCGTTGGATATGGATAACGATTTCAAGACCTGGGTGGGGATCATTCAATCCTTTGCCCGCCATAACGTGATTGGAGATAAAGTTGAACTG  
CCTTTTGTGAGTTTGCAAAACCTTTCGCGGTATACCTTCAAGCCAGTCATCACGCAGGCTTCGCGACCGCATCAGTCCTTCCCTGAAGCGTATTGCAGGTACCGT  
GATCTCCTTTTCCCGCACCGACGAGAAGCACACACGGGAATACATCACCCATCTGGTACAGTCAGCCTACTACGATACTGAACGGGATATTGTTTACAGG  
CTGATCCCCGCCTTTTTGAACTGTACCAGTTTGACAGAAAGTCTTCTTTCAGCTTAAGGCGATTAATGCCCTGAAGCGACGGGAGTCCGCCCAGGCACTTTA  
CACCTTTATAGAGAGCCTGCCCCGGGATCCGGCACCGATATCGCTGGCGCGGCTGCGTGCACCGCTCAATCTGAAGTCTCCGGTATTTTCCCAGAACCAGACG  
GTAAGACGGGCAATGGAGCAGTTGCGCGAGATTGGATACCTTGATTACACGGAGATCCTGCGGGGGCGAACAAAATTCTTCTGTATTCACTACCGGCGCCCC  
GGTAAAAGCGCCAAGTATGAGAGTAAGGAAAATCCGTTGCCACCTTCACCTACGGAAAAAGTCAGTCCGGAGATGGCGGAGAAGCTTGCCCTGCTTGAAA

AACTGGGCATCACGCTGGATGACCTGGAAAACTCTTCAAATCCCGCTGA

>pRHBSTW-00605\_2 (CP056698)

GTGGATAAGTCCTCCGGTGAGCTGGTGACACTGACACCAACAATAACAACACCGTACAGCCTGTGGCGCTGATGCGTCTTGGCGTCTTTGTACCCACCCTTA  
AGTCACTGAAGAACAGTAAAAAATACTGTCACGTACCGATGCCACGGAAGAAGTACGCGTCTTTCTCTGGCACGGGCTGAAGGGTTTGATAAGGTTG  
AGATCACTGGCCCCGGTTGGATATGGATAACGATTTCAAGACCTGGGTGGGGATCATTTCATTCCTTTGCCCGCCATAACGTGATTGGAGATAAAGTTGAACTG  
CCTTTTGTGCGAGTTTGCAAACTTTGCGGTATACCTTCAAGCCAGTCATCACGCAGGCTTCGCGACCGCATCAGTCCTTCCCTGAAGCGTATTGCAGGTACCGT  
GATCTCCTTTTCCCGCACCGACGAGAAGCACACACGGGAATACATCACCCATCTGGTACAGTCAGCCTACTACGATACTGAACGGGATATTGTTTCAGTTACAGG  
CTGATCCCCGCCTTTTTGAACTATAACAGTTTGACAGAAAGGTTCTTCTTCAGCTTAAAGGCGATTAATGCCCTGAAGCGACGGGAGTCCGCCAGGCACTTTAC  
ACCTTTATAGAGAGCCTGCCCGGGATCCGGCACCGATATCGCTGGCGCGGCTGCGTGCCCGCCTCAATCTGAAGTCTCCGGTATTTTCCAGAACCCAGACGGT  
AAGACGGGCAATGGAGCAGTTGCGCGAGATTGGATACCTTGATTACACGGAGATCCTGCGGGGGCGAACAAAATTCTTCTGTATTCACTACCGGCGCCCCCGG  
TTAAAAGCGCCAAGTGATGAGAGTAAGGAAAATCCGTTGCCACCTTCACCTACGGAAAAAGTCAGTCCGGAGATGGCGGAGAAGCTTGCCCTGCTTGAAAA  
CTGGGCATCACGCTGGATGACCTGGAAAACTCTTCAAATCCCGCTGA

>pRHBSTW-00300\_2 (CP056643)

GTGGATAAGTCCTCCGGTGAGCTGGTGACACTGACACCAACAATAACAACACCGTACAGCCTGTGGCGCTGATGCGTCTTGGCGTCTTTGTACCCACCCTTA  
AGTCACTGAAGAACAGTAAAAAATACTGTCACGTACCGATGCCACGGAAGAAGTACGCGTCTTTCTCTGGCACGGGCTGAAGGGTTTGATAAGGTTG  
AGATCACTGGCCCCGGTTGGATATGGATAACGATTTCAAGACCTGGGTGGGGATCATTTCATTCCTTTGCCCGCCATAACGTGATTGGAGATAAAGTTGAACTG  
CCTTTTGTGCGAGTTTGCAAACTTTGCGGTATACCTTCAAGCCAGTCATCACGCAGGCTTCGCGACCGCATCAGTCCTTCCCTGAAGCGTATTGCAGGTACCGT  
GATCTCCTTTTCCCGCACCGACGAGAAGCACACACGGGAATACATCACCCATCTGGTACAGTCAGCCTACTACGATACTGAACGGGATATTGTTTCAGTTACAGG  
CTGATCCCCGCCTTTTTGAACTGTACCAGTTTGACAGAAAGGTCCTTCTTCAGCTTAAAGCGATTAATGCCCTGAAGCGACGGGAGTCCGCCAGGCACTTTA  
CACCTTTATAGAGAGCCTGCCCGGGATCCGGCACCGATATCGCTGGCGCGGCTGCGTGCCCGCCTCAATCTGAAGTCTCCGGTATTTTCCAGAACCCAGACG  
GTAAGACGGGCAATGGAGCAGTTGCGCGAGATTGGATACCTTGATTACACGGAGATCCTGCGGGGGCGAACAAAATTCTTCTGTATTCACTACCGGCGCCCC  
GGTAAAAGCGCCAAGTGATGAGAGTAAGGAAAATCCGTTGCCACCTTCACCTACGGAAAAAGTCAGTCCGGAGATGGCGGAGAAGCTTGCCCTGCTTGAAA  
AACTGGGCATCACGCTGGATGACCTGGAAAACTCTTCAAATCCCGCTGA

>pCFSAN024441\_01 (CP024166)

GTGGATAAATCCTCCGGGGAAGTCGTCAATCTCACTCCTAATGCCAGTAATACAGTGCAGCCTGTGGCACTGATGCGGCTTGGGGTGTGTTGTTCTCACTCAA  
ATCACTGAAAAACAGTAAAAAGAACACGCTTTCACGTACTGATGCGACGGAAGAAGTACGCGTCTGTCTCTCGCCAGAGCCGAAGGGTTTGATAAGGTGGA

GATCACCGGTCCCCGCCTGGATATGGATAATGACTTCAAGACCTGGGTAGGGGTGATCCATTCCCTTTGCCCGCCATAAGGTTATCGGGCGATAAGGTTGAACTGC  
CATTTGTCGAGTTCGCCAAACTCTGCGGGATCCCCTCCAGTCAGTCATCACGCAAGCTCCGGGAGCGTATCAGCCCCTCGCTCAAACGCATTGCAGGGACCGT  
GATCTCCTTTTCCCGCACGACCGAAAAGTATACCAAAGAGTACATCACGCATCTTGTGCAGTCGGCCTATTATGATACGGAGAAGGATATCGTTCAGTTGCAGG  
CCGATCCGCGCCTGTTTGAAGTCTACCAGTTTGACCGGAAAGTGTTGCTGCAGCTCAAGGCCATTAATGCCCTGAAACGCCGGGAGTCCGCTCAGGCTCTTTAT  
ACCTTTATAGAGAGTCTGCCTCGGGATCCGGCCCCATATCGCTGGCGCGTCTTCGGGCCCCGCCTGAACCTGAAATCTCCTGTGTTCTCTCAGAATCAGACGGT  
GAGGCGTGCCATGGAGCAGCTCCGGGAGATTGGCTATCTGGATTACACTGAGATCCAGCGGGGACGCACCAAACCTCTTCTGTATTCACTACCGGCGACCCAAG  
TTAAAGCCACCACATGATGAGAGCGCTGAGAACCCTCAGTTGCCTGCCACAACGGCAGGGGATGTCAGTCCGGAGATGACTGAAAAGCTGGCGCTTTTAGAA  
AACTTGGCATCACGCTCGATGACCTAGAAAAACTCTTCAAATCCCGCTGA

>pCFSAN024229 (CP019175)

GTGGATAAATCCTCCGGTGAAGTCGTCAATCTGACTCCTAATGCCGCTAATACAGTGCAGCCTGTGGCACTGATGCGGCTTGGGGTGTGTTGTTCTACGCTCAA  
ATCACTGAAAAACAGTAAAAAAATACGCTTGCCCGGACTGATGCAACGGAAGAACTGACGCGTCTGTCTCTCGCCAGAGCCGAAGGGTTTGATAAGGTGGA  
GATCACCGGTCCCCGCCTGGATATGGATAATGACTTCAAGACTTGGGTTCGGGGTATCCATTCCCTTTGCCCGACATAAAGTTATCGGGCGATAAGGTTGAACTGC  
CGTTTGTGAGTTCGCCAAACTTTGCGGGATCCCCTCGAGTCAGTCATCACGCAAGCTTCGGGAGCGTATCAGCCCCTCACTCAAGCGTATCGCAGGTACCGT  
GATCTCGTTTTCCCGCACGACTGAAAAGCACACAAAAGAGTACATCACTCATCTTGTGCAGTCGGCCTATTATGATACGGAAAAGGATGTCGTCCAGTTACAGG  
CCGATCCGCGCCTGTTTGAAGTGTATCAGTTTGACCGGAAAGTATTGTTGCAGCTCAAGGCCATCAATGCCCTGAAGCGCCGTGAGTCCGCTCAGGCCCTTTAT  
ACCTTTATAGAGAGTCTGCCCCGGGATCCGGCGCCGATATCGCTGGCGCGTCTGCGGGCCCCGCCTGAACCTGAAATCTCCGGTGTGTTCTCTCAGAATCAGACTGT  
AAGGCGTGCAATGGAGCAGCTTCGTGAAATCGGTTATCTTGACTACACCGAGATCCAGCGGGGGCGCTCCAAACTCTTTTGCATTCACTACCGTTCGACCCAAG  
TTAAAGCCACCACATGATGAAAGTGCTGAGAACCCTCAGTTGCCTGCCACACCGGCAGGAGATGTCAGTCCGGAGATGACTGAAAAACTTGGCGCTTTTAGAG  
AACTTGGCATCACGCTCGATGACCTGGAAAAACTCTTCAAATCCCGCTGA

>pCP053580 (CP053580)

CTGTTTGAAGAGGTGGATAAATCCTCCGGTGAGGTTCGTAAATCTGACACCTAATGCCAGTAATACAGTGCAGCCTGTGGCACTGATGCGGCTTGGGGTGTGTTGT  
TCCTACGCTCAAATCACTGAAAAACAGTAAAAAGAACACGCTTTCGCGTACTGATGCGACGGAAGAGCTGACGCGTCTGTGCTCGCCAGAGCCGAAGGGTT  
TGATAAGGTCGAGATCACCGTCCCCGCCTGGATATGGATAATGACTTCAAGACCTGGGTAGGAGTGATCCATTCCCTTTGCCCGCCATAAGGTTATCGGTGATAA  
GGTTGAACTGCCGTTTGTGAGTTCGCCAAACTCTGCGGGATCCCCTCCAGTCAGTCATCCCGCAAGCTCCGGGAGCGTATCAGCCCCTCGCTCAAACGTATT  
GCGGGTACCGTGATCTCGTTTTTCGCGCACGACCGAAAATCACACCAAAGAGTACATCACGCACCTGGTGCAGTCGGCCTACTATGATACGGAGAAGGATATCG  
TCCAGTTGCAGGCCGATCCGCGCCTGTTTGAAGTGTATCAGTTTGACCGCAAAGTGTTGCTGCAGCTCAAGGCCATCAATGCCCTGAAGCGCCGGGAGTCTGC



CCAGGCCCTTTATACCTTTATAGAGAGTCTGCCCCGGGATCCTGCGCCGATATCACTGGCGCGTCTGCGGGCCCGTCTGAATCTGAAGTCTCCTGTGTTTTTCGCA  
GAACCAGACGGTGAGGCGTGCTATGGAGCAGCTCCGGGAGATTGGCTATCTGGATTACACTGAGATCCAGCGGGGACGCACCAAACCTTTTCTGTATTCACTAC  
CGGCGACCCAAGTTAAAGCCACCACATGATGAAAGTGCTGAGAACCCGCAGTTGCCTGCCACACCTGCAGGGGATGTCAGTCCGGAGATGACTGAAAACTT  
GCGCTTTTAGAGAACTTGGCATCACGCTCGATGACTTGGAAAACTCTTCAAATCCCGCTGA

>pCP054717 (CP054717)

CTGTTTGAAGAGGTGGATAAATCCTCCGGTGAGGTCGTAAATCTGACACCTAATGCCAGTAATACAGTGCAGCCTGTGGCACTGATGCGGCTTGGGGTGTGTTGT  
TCCTACGCTCAAATCACTGAAAAACAGTAAAAAGAACACGCTTTCGCGTACTGATGCGACGGAAGAGCTGACGCGTCTGTGCTCGCCAGAGCCGAAGGGTT  
TGATAAGGTCGAGATCACCGGTCCCCGCTGGATATGGATAATGACTTCAAGACCTGGGTAGGAGTGATCCATTCTTTGCCCGCCATAAGGTTATCGGTGATAA  
GGTTGAACTGCCGTTTGTGAGTTTCGCCAAACTCTGCGGGATCCCTTCCAGTCAGTCATCCCGCAAGCTCCGGGAGCGTATCAGCCCCGCTCAAACGTATT  
GCGGGTACCGTGATCTCGTTTTTCGCGCACGACCGAAAATCACACCAAAGAGTACATCACGCACCTGGTGCAGTCGGCCTACTATGATACGGAGAAGGATATCG  
TCCAGTTGCAGGCCGATCCGCGCCTGTTTGAAGTGTATCAGTTGACCGCAAAGTGTGCTGCAGCTCAAGGCCATCAATGCCCTGAAGCGCCGGGAGTCTGC  
CCAGGCCCTTTATACCTTTATAGAGAGTCTGCCCCGGGATCCTGCGCCGATATCACTGGCGCGTCTGCGGGCCCGTCTGAATCTGAAGTCTCCTGTGTTTTTCGCA  
GAACCAGACGGTGAGGCGTGCTATGGAGCAGCTCCGGGAGATTGGCTATCTGGATTACACTGAGATCCAGCGGGGACGCACCAAACCTTTTCTGTATTCACTAC  
CGGCGACCCAAGTTAAAGCCACCACATGATGAAAGTGCTGAGAACCCGCAGTTGCCTGCCACACCTGCAGGGGATGTCAGTCCGGAGATGACTGAAAACTT  
GCGCTTTTAGAGAACTTGGCATCACGCTCGATGACCTGGAAAACTCTTCAAATCCCGCTGA

>pC51\_002 (CP042483)

TTGTTTGAAGAGGTGGATAAATCCTCCGGTGAAGTCGTAAATCTCACTCCTAATGCCAGTAATACAGTGCAGCCAGTGGCACTGATGCGGCTCGGAGTGTGTTGT  
CCCTACTCTCAAATCACTGAAAAACAGTAAAAAGAACACGCTTTCGCGTACTGATGCGACGGAAGAAGTACGCGTCTATCTCTCGCCAGAGCCGAAGGGTT  
TGATAAGGTGGAGATCACCGGTCCCCGCTGGATATGGATAATGACTTCAAGACCTGGGTAGGGGTGATCCATTCTTTGCACGCCATAAGGTTATCGGCGATA  
AGGTTGAACTGCCGTTTGTGAGTTTCGCCAAACTCTGTGGGATCCCTTCCAGTCAGTCATCACGCAAGCTCCGGGAGCGTATCAGCCCCGCTAAAACGTAT  
CGCGGGTACCGTGATCTCGTTTTCCCGCACGACCGAAAAGTACACCAAAGAGTACATCACACACCTGGTGCAGTCGGCCTACTATGATACGGAGAAGGATATC  
GTCCAGTTGCAGGCCGATCCGCGCCTCTTTGAACTCTACCAGTTTACCAGTTTACCAGTTTACCAGTTTACCAGTTTACCAGTTTACCAGTTTACCAGTTTACCAGTTT  
CCCAGGCCCTTTATACCTTTATAGAGAGTCTGCCCCGGGATCCGGCACCGATATCTCTGGCGCGTCTGCGGGCCCGCTGAACCTGAAATCCCTGTGTTCTCG  
CAGAACCAGACGGTGAGGCGTGCCATGGAGCAGCTCCGGGAGATTGGCTATCTGGATTACACGGAGATCCAGCGGGGACGCACTAAACTCTTCTGCATTCAAT  
ACCGGCGGCCCAAGTTAAACCACCGCATGATGAGAGTGCTGAGAACCCTCAACTGCCAGCCGCACCGGGTGTGAGTCCGGAGATGGCTGAGAAATTGG  
CGCTTTTAGAGAACTTGGCATCACGCTCGATGACCTGGAAAACTCTTCAAATCCCGCTGA

>p12949-FIIY (MH909344)

TTGTTTGAAGAGGTGGATAAATCCTCCGGTGAAGTCGTAAATCTCACTCCTAATGCCAGTAATACAGTGCAGCCAGTGGCACTGATGCGGCTCGGAGTGTGTTGT  
CCCTACTCTCAAATCACTGAAAAACAGTAAAAAGAACACGCTTTCGCGTACTGATGCGACGGAAGAACTGACGCGTCTATCTCTCGCCAGAGCCGAAGGGTT  
TGATAAGGTGGAGATCACCGGTCCCCGCCTGGATATGGATAATGACTTCAAGACCTGGGTAGGGGTGATCCATTCTTTGCACGCCATAAGGTTATCGGGCGATA  
AGGTTGAACTGCCGTTTGTGAGTTCGCCAAACTCTGTGGGATCCCCTCCAGTCAGTCATCACGCAAGCTCCGGGAGCGTATCAGCCCCTCGCTAAAACGTAT  
CGCGGGTACCGTGATCTCGTTTTCCCGCACGACCGAAAAGTCACACCAAAGAGTACATCACACACCTGGTGCAGTCGGCCTACTATGATACGGAGAAGGATATC  
GTCCAGTTGCAGGCCGATCCGCGCCTCTTTGAACTCTACCAGTTTGACCGGAAAAGTGTTACTGCAGCTCAAGGCCATCAATGCCCTGAAACGCCGGGAGTCCG  
CCCAGGCCCTTTATACCTTTATAGAGAGTCTGCCCCGGGATCCGGCACCGATATCTCTGGCGCGTCTGCGGGCCCCGCTGAACCTGAAATCCCCTGTGTTCTCG  
CAGAACCAGACGGTGAGGCGTGCCATGGAGCAGCTCCGGGAGATTGGCTATCTGGATTACACGGAGATCCAGCGGGGACGCACTAAACTCTTCTGCATTCAAT  
ACCGGCGGCCCAAGTTAAAACCACCGCATGATGAGAGTGCTGAGAACCCTCAACTGCCAGCCGCACCGGGTGATGTGAGTCCGGAGATGGCTGAGAAATTGG  
CGCTTTTAGAGAACTTGGCATCACGCTCGATGACCTGGAAAAACTCTTCAAATCCCGCTGA

>pE33\_002 (CP042519)

TTGTTTGAAGAGGTGGATAAATCCTCCGGTGAAGTCGTAAATCTCACTCCTAATGCCAGTAATACAGTGCAGCCAGTGGCACTGATGCGGCTCGGAGTGTGTTGT  
CCCTACTCTCAAATCACTGAAAAACAGTAAAAAGAACACGCTTTCGCGTACTGATGCGACGGAAGAACTGACGCGTCTATCTCTCGCCAGAGCCGAAGGGTT  
TGATAAGGTGGAGATCACCGGTCCCCGCCTGGATATGGATAATGACTTCAAGACCTGGGTAGGGGTGATCCATTCTTTGCACGCCATAAGGTTATCGGGCGATA  
AGGTTGAACTGCCGTTTGTGAGTTCGCCAAACTCTGTGGGATCCCCTCCAGTCAGTCATCACGCAAGCTCCGGGAGCGTATCAGCCCCTCGCTAAAACGTAT  
CGCGGGTACCGTGATCTCGTTTTCCCGCACGACCGAAAAGTCACACCAAAGAGTACATCACACACCTGGTGCAGTCGGCCTACTATGATACGGAGAAGGATATC  
GTCCAGTTGCAGGCCGATCCGCGCCTCTTTGAACTCTACCAGTTTGACCGGAAAAGTGTTACTGCAGCTCAAGGCCATCAATGCCCTGAAACGCCGGGAGTCCG  
CCCAGGCCCTTTATACCTTTATAGAGAGTCTGCCCCGGGATCCGGCACCGATATCTCTGGCGCGTCTGCGGGCCCCGCTGAACCTGAAATCCCCTGTGTTCTCG  
CAGAACCAGACGGTGAGGCGTGCCATGGAGCAGCTCCGGGAGATTGGCTATCTGGATTACACGGAGATCCAGCGGGGACGCACTAAACTCTTCTGCATTCAAT  
ACCGGCGGCCCAAGTTAAAACCACCGCATGATGAGAGTGCTGAGAACCCTCAACTGCCAGCCGCACCGGGTGATGTGAGTCCGGAGATGGCTGAGAAATTGG  
CGCTTTTAGAGAACTTGGCATCACGCTCGATGACCTGGAAAAACTCTTCAAATCCCGCTGA

>pSLT-BT (FN432031)

TTGTTTGTAGAGGTGGATAAATCCTCCGGTGAATCGTAAATCTCACTCCTAATGCCAGTAATACCGTGCAGCCTGTAGCTCTGATGCGGCTTGAGTATTTGTT  
CCTACGCTTAAGTCACTGAAAAACCGTAAAAAGAACACGCTTTCGCGTACTGATGCGTCCGGAAGAACTGACGCGTCTGTCTCTCGCCAGGGCCGAGGGGTTT  
GATAAAGTGGAGATCACTGGTCCCCGCCTGGATATGGATAATGACTTCAAGACCTGGGTAGGGGTGATTCAATCCTTTGCCCGGCATAAAGTTATTGGCGATAA

AGTTGAGCTGTCGTTTGTGCGAATTCGCCAAACTCTGTGGGATCCCCTCCAGTCAGTCATCCCGGAAGCTCCGGGAACGTATCAGTCCTTCACTTAAGCGTATCG  
CGGGTACTGTGATCTCGTTTTCCCGCACAAACGGAGAAGCACACCAAAGAGTACATTACGCATCTGGTACAGTCGGCTTACTATGATACGGAAAAAGATATCGTT  
CAGCTGCAAGCCGATCCGCGCCTCTTTGAACTCTACCAGTTTGACCGGAAAGTGCTGCTGCAGCTCAAGGCCATCAATGCCCTGAAGCGCCGGGAGTCCGCT  
CAGGCTCTTTATACCTTTATAGAGAGTCTGCCGCGGGATCCGGCGCCGATATCACTGGCGCGTCTACGGGCCCGTCTGAACCTGAAATCCCCTGTGTTCTCGCA  
GAACCAGACGGTGAGGCGTGCCATGGAGCAGCTCCGGGAGATTGGCTATCTGGATTACACTGAGATCCAGCGTGGGCGTACAAAACCTCTTCTGTATTCACTAC  
CGCCGGCCCAAGTTAAAGCCACCTCATGATGAGAGTGCGGAGAACCCGCAACTGTCAGCCACACCCGGGTGACGTCAGTCCGGAGATGGCTGAAAAAATTGC  
ACTTCTTGATAAACTGGGCATCACACTTGATGACCTGGAGAAACTCTTCAAATCCCCTGA

>pSVC50 (AY509003)

TTGTTTGTAGAGGTGGATAAATCCTCCGGTGAAATCGTAAATCTCACTCCTAATGCCAGTAATACCGTGCAGCCTGTAGCTCTGATGCGGCTTGGAGTATTTGTT  
CCTACGCTTAAGTCACTGAAAAACCGTAAAAAGAACACGCTTTCGCGTACTGATGCGTCCGGAAGAACTGACGCGTCTGTCTCTCGCCAGGGCCGAGGGGTTT  
GATAAAGTGGAGATCACTGGTCCCCGCCTGGATATGGATAATGACTTCAAGACCTGGGTAGGGGTGATTCATTCTTTGCCCGGCATAAAGTTATTGGCGATAA  
AGTTGAGCTGTCGTTTGTGCGAATTCGCCAAACTCTGTGGGATCCCCTCCAGTCAGTCATCCCGGAAGCTCCGGGAACGTATCAGTCCTTCACTTAAGCGTATCG  
CGGGTACTGTGATCTCGTTTTCCCGCACAAACGGAGAAGCACACCAAAGAGTACATTACGCATCTGGTACAGTCGGCTTACTATGATACGGAAAAAGATATCGTT  
CAGCTGCAAGCCGATCCGCGCCTCTTTGAACTCTACCAGTTTGACCGGAAAGTGCTGCTGCAGCTCAAGGCCATCAATGCCCTGAAGCGCCGGGAGTCCGCT  
CAGGCTCTTTATACCTTTATAGAGAGTCTGCCGCGGGATCCGGCGCCGATATCACTGGCGCGTCTACGGGCCCGTCTGAACCTGAAATCCCCTGTGTTCTCGCA  
GAACCAGACGGTGAGGCGTGCCATGGAGCAGCTCCGGGAGATTGGCTATCTGGATTACACTGAGATCCAGCGTGGGCGTACAAAACCTCTTCTGTATTCACTAC  
CGCCGGCCCAAGTTAAAGCCACCTCATGATGAGAGTGCGGAGAACCCGCAACTGTCAGCCACACCCGGGTGACGTCAGTCCGGAGATGGCTGAAAAAATTGC  
ACTTCTTGATAAACTGGGCATCACACTTGATGACCTGGAGAAACTCTTCAAATCCCCTGA

>pKY401053 (KY401053)

TTGTTTGAAGAGGTGGATAAATCCTCCGGTGAAATCGTAAATCTCACTCCTAATGCCAGTAATACCGTGCAGCCTGTAGCTCTGATGCGGCTTGGAGTATTTGTT  
CCTACGCTTAAGTCACTGAAAAACCGTAAAAAGAACACACTTTCGCGTACTGATGCGTCCGGAAGAACTGACGCGTCTGTCTCTCGCCAGGGCCGAGGGGTTT  
GATAAAGTGGAGATCACCGTCCCCGCCTGGATATGGATAATGACTTCAAGACCTGGGTAGGGGTGATCCATTCTTTGCCCGACATAAAGTTATTGGCGATAA  
AGTTGAGCTGCCGTTTGTGCGAATTCGCCAAACTCTGTGGGATCCCCTCCAGTCAGTCATCCCGGAAGCTCCGGGAACGTATCAGTCCTTCACTTAAGCGTATCG  
CGGGTACTGTGATCTCGTTTTCCCGCACAAACGGAGAAGCACACCAAAGAGTACATTACGCATCTGGTACAGTCGGCTTACTATGATACGGAAAAAGATATCGTT  
CAACTGCAAGCCGATCCGCGCCTCTTTGAACTCTACCAGTTTGACCGGAAAGTGCTGCTGCAGCTCAAGGCCATCAATGCCCTGAAGCGCCGGGAGTCCGCT  
CAGGCTCTTTATACCTTTATAGAGAGTCTGCCGCGGGATCCGGCGCCGATATCACTGGCGCGGCTACGGGCCCGTCTGAACCTGAAATCCCCTGTGTTCTCGCA

GAACCAGACGGTGAGGCGTGCCATGGAGCAGCTCCGGGAGATTGGCTATCTGGATTACACTGAGATCCAGCGTGGGCGCACAAAACCTCTTCTGTATTCACTAC  
CGCCGGCCCAAGTTAAAGCCACCTCATGATGAGAGTGC GGAGAACCCGCAACTGCCAGCCACACCGGGTGACGTCAGTCCGGAGATGGCTGAAAACTTGC  
ACTTCTTGATAAACTGGGCATCACACTTGATGACCTGGAGAACTCTTCAAATCCCGCTGA

>pCP050989 (CP050989)

CTGTTTGAAGAGGTGGATAAATCCTCCGGTGAAGTCGTAATCTCACTCCTAATGCCAGTAATACAGTGCAGCCAGTGGCACTGATGCGGCTCGGAGTGTTTGT  
TCCTACACTCAAGTCACTGAAAAACAGTAAAAAGAACACGCTTTCGCGTACTGATGCGACGGAAGAACTGACGCGTCTGTCTCTCGCCAGGGCCGAAGGGTT  
TGATAAGGTCGAGATCACCGGTCCCCGACTGGATATGGATAATGACTTCAAGACCTGGGTAGGGGTGATCCATTCTTTGCCCGGCATAAAGTTATCGGCGATA  
AAGTTGAGCTGCCGTTTGTGCAATTCGCCAAACTTTGCGGCATCCCTCAAGTCAGTCATCACGTAAGCTCCGGGAGCGTATCAGCCCTTCACTCAAGCGTATT  
GCGGGTACAGTGATCTCGTTTTCCCGCACAAACGGAGAAGCACACTAAAGAGTACATCACGCATCTGGTTCAGTCGGCTTACTATGATACGGAGAAGGATATCGT  
TCAGCTGCAGGCCGATCCACGGCTGTTTGA ACTCTACCAGTTTGACCGGAAAGTCCTGCTGCAGCTCAAGGCCATCAATGCCCTGAAGCGCCGGGAGTCCGC  
TCAGGCTCTTTATACCTTTATAGAGAGTCTGCCTCGGGATCCGGCGCCGATATCGCTGGCGCGTCTGCGGGCCCGTCTGAACCTGAAATCCCCAGTGTTTTCGC  
AAAACCAGACGGTAAGGCGTGCGATGGAGCAGCTCCGGGAGATTGGTTATCTGGATTACACTGAGATCCAGCGGGGACGCACCAAACCTCTTCTGCATTCATA  
CCGCCGTCCCAAATTAAGCCACCTCATGATGAGAGTGC GGAGAACCCGCAGCTGCCTGCCACACCGGGTGATGTCAGTCCGGAGATGGCTGAAAACTTGC  
ACTTCTTGAGAACTGGGCATCACGCTTGATGACCTGGAAAACTCTTCAAATCCCGCTGA

>pCP054902 (CP054902)

CTGTTTGAAGAGGTGGATAAATCCTCCGGTGAAGTCGTAATCTCACTCCTAATGCCAGTAATACAGTGCAGCCAGTGGCACTGATGCGGCTCGGAGTGTTTGT  
TCCTACACTCAAGTCACTGAAAAACAGTAAAAAGAACACGCTTTCGCGTACTGATGCGACGGAAGAACTGACGCGTCTGTCTCTCGCCAGGGCCGAAGGGTT  
TGATAAGGTCGAGATCACCGGTCCCCGACTGGATATGGATAATGACTTCAAGACCTGGGTAGGGGTGATCCATTCTTTGCCCGGCATAAAGTTATCGGCGATA  
AAGTTGAGCTGCCGTTTGTGCAATTCGCCAAACTTTGCGGCATCCCTCAAGTCAGTCATCACGTAAGCTCCGGGAGCGTATCAGCCCTTCACTCAAGCGTATT  
GCGGGTACAGTGATCTCGTTTTCCCGCACAAACGGAGAAGCACACTAAAGAGTACATCACGCATCTGGTTCAGTCGGCTTACTATGATACGGAGAAGGATATCGT  
TCAGCTGCAGGCCGATCCACGGCTGTTTGA ACTCTACCAGTTTGACCGGAAAGTCCTGCTGCAGCTCAAGGCCATCAATGCCCTGAAGCGCCGGGAGTCCGC  
TCAGGCTCTTTATACCTTTATAGAGAGTCTGCCTCGGGATCCGGCGCCGATATCGCTGGCGCGTCTGCGGGCCCGTCTGAACCTGAAATCCCCAGTGTTTTCGC  
AAAACCAGACGGTAAGGCGTGCGATGGAGCAGCTCCGGGAGATTGGTTATCTGGATTACACTGAGATCCAGCGGGGACGCACCAAACCTCTTCTGCATTCATA  
CCGCCGTCCCAAATTAAGCCACCTCATGATGAGAGTGC GGAGAACCCGCAGCTGCCTGCCACACCGGGTGATGTCAGTCCGGAGATGGCTGAAAACTTGC  
ACTTCTTGAGAACTGGGCATCACGCTTGATGACCTGGAAAACTCTTCAAATCCCGCTGA

>pS65EC (CP036244)

GTGGATAAATCCTCCGGTGAAGTCGTAATCTTACACCTAATGCCAGTAATACAGTGCAGCCTGTGGCACTGATGCGGCTTGGGGTGTGTTGTTCCCACGCTTAA  
ATCACTGAAGAACAGCAAAAAAACACGCTTTCCCGGACTGATGCGACGGAAGAACTGACGCGCCTGTCTCTCGCCAGAGCCGAAGGTTTTGATAAGGTGG  
AGATCACCGGCCCGCGTCTGGATATGGATAATGACTTCAAGACCTGGGTAGGGGTGATTCATTCCTTTGCCCGCCATAAGGTTATCGGGGATAAAGTTGAGCTG  
CCGTTTGTTCGAGTTCGCCAAACTCTGCGGGATCCCCTCCAGTCAGTCATCACGTAAGCTTCGTGAACGTATAAGCCCCTCACTCAAACGTATCGCGGGTACCGT  
GATCTCATTTCCTCCGCACAACGGAAAAGCACACCAAAGAGTACATCACACATCTGGTGCAGTCGGCTTACTATGATACGGAAAAGGATATCGTCCAGCTGCAG  
GCCGATCCACGCCTGTTTGTAGCTCTACCAGTTTGACCGGAAAGTGCTGCTGCAACTCAAGGCCATCAATGCCCTGAAGCGCCGGGAGTCTGCGCAGGCCCTGT  
ATACCTTTATAGAGAGTCTGCCACGGGATCCGGCGCCGATATCTCTGGCGCGTCTGCGGGCCCGTCTTAACCTGAAATCCCCTGTGTTCTCACAGAACCAGACG  
GTGAGGCGTGCCATGGAGCAGCTACGGGAGATTGGCTACCTGGATTACTGAGATCCAGCGGGGACGCACCAAACCTCTTCTGCATTCAATTACCGCCGGCCCA  
AGTTAAAGCCACCTCATGATGAGAGTGC GGAGAACCCGCAGCTGCCAGCCACAACGGGTGATGTCAGCCCGGAAATGGCTGAAAAACTGAAGCTCCTCGAG  
AAACTGGGCATCACCTTGATGACCTGGAAAAACTCTTCAAATCCCGCTGA

>pMAR2 (CP059841)

GTGGATAAATCCTCCGGTGAAGTCGTAATCTTACACCTAATGCCAGTAATACAGTGCAGCCTGTGGCACTGATGCGGCTTGGGGTGTGTTGTTCCCACGCTTAA  
ATCACTGAAGAACAGCAAAAAAACACGCTTTCCCGGACTGATGCGACGGAAGAACTGACGCGCCTGTCTCTCGCCAGAGCCGAAGGTTTTGATAAGGTGG  
AGATCACCGGCCCGCGTCTGGATATGGATAATGACTTCAAGACCTGGGTAGGGGTGATTCATTCCTTTGCCCGCCATAAGGTTATCGGGGATAAAGTTGAGCTG  
CCGTTTGTTCGAGTTCGCCAAACTCTGCGGGATCCCCTCCAGTCAGTCATCACGTAAGCTTCGTGAACGTATAAGCCCCTCACTCAAACGTATCGCGGGTACCGT  
GATCTCATTTCCTCCGCACAACGGAAAAGCACACCAAAGAGTACATCACACATCTGGTGCAGTCGGCTTACTATGATACGGAAAAGGATATCGTCCAGCTGCAG  
GCCGATCCACGCCTGTTTGTAGCTCTACCAGTTTGACCGGAAAGTGCTGCTGCAACTCAAGGCCATCAATGCCCTGAAGCGCCGGGAGTCTGCGCAGGCCCTGT  
ATACCTTTATAGAGAGTCTGCCACGGGATCCGGCGCCGATATCTCTGGCGCGTCTGCGGGCCCGTCTTAACCTGAAATCCCCTGTGTTCTCACAGAACCAGACG  
GTGAGGCGTGCCATGGAGCAGCTACGGGAGATTGGCTACCTGGATTACTGAGATCCAGCGGGGACGCACCAAACCTCTTCTGCATTCAATTACCGCCGGCCCA  
AGTTAAAGCCACCTCATGATGAGAGTGC GGAGAACCCGCAGCTGCCAGCCACAACGGGTGATGTCAGCCCGGAAATGGCTGAAAAACTGAAGCTCCTCGAG  
AAACTGGGCATCACCTTGATGACCTGGAAAAACTCTTCAAATCCCGCTGA

>pM505-a DNA (AP023221)

GTGGATAAATCCTCCGGTGAAGTCGTAATCTTACACCTAATGCCAGTAATACAGTGCAGCCTGTGGCACTGATGCGGCTTGGGGTGTGTTGTTCCCACGCTTAA  
ATCACTGAAGAACAGCAAAAAAACACGCTTTCCCGGACTGATGCGACGGAAGAACTGACGCGCCTGTCTCTCGCCAGAGTCGAAGGTTTTGATAAGGTGG  
AGATCACCGGCCCGCGTCTGGATATGGATAATGACTTCAAGACCTGGGTAGGGGTGATTCATTCCTTTGCCCGCCATAAGGTTATCGGGGATAAAGTTGAGCTG  
CCGTTTGTTCGAGTTCGCCAAACTCTGCGGGATCCCCTCCAGTCAGTCATCACGTAAGCTTCGTGAACGTATAAGCCCCTCACTCAAACGTATCGCGGGTACCGT

GATCTCATTTTCCCGCACAAACGGAAAAGCACACCAAAGAGTACATCACACATCTGGTGCAGTCGGCTTACTATGATACGGAAAAGGATATCGTCCAGCTGCAG  
GCCGATCCACGCCTGTTTGTAGCTCTACCAGTTTGACCGAAAAGTGCTGCTGCAACTCAAGGCCATCAATGCCCTGAAGCGCCGGGAGTCTGCGCAGGCCCTGT  
ATACCTTTATAGAGAGTCTGCCACGGGATCCGGCGCCGATATCTCTGGCGCGTCTGCGGGCCCGTCTTAACCTGAAATCCCCTGTGTTCTCACAGAACCAGACG  
GTGAGGCGTGCCATGGAGCAGCTACGGGAGATTGGCTACCTGGATTACACTGAGATCCAGCGGGGACGCACCAAACCTTTCTGCATTATTACCGCCGGCCCA  
AGTTAAAGCCACCTCATGATGAGAGTGCGGAGAACCCGCAGCTGCCAGCCACAACGGGTGATGTCAGCCCGGAAATGGCTGAAAAACTGAAGCTCCTCGAG  
AAACTGGGCATCACCTTGATGACCTGGAAAAACTCTTCAAATCCCGCTGA

>pCP053317 (CP053317)

TTGATTTGCAGTTATTGTGAGCAAAAAAGCGGATAAACGCGAGCATGGGGGTTTTCAAACGCGAGCCGCTACAGGTAGGGGTGATCCATTCTTTGCCCGGC  
ATAAGGTTATCGGCGATAAAGTTGAGCTGCCGTTTGTTCGAGTTTCGCCAAACTCTGCGGGATCCCCTCCAGTCAGTCATCACGTAAGCTCCGGGAACGTATCAGC  
CCTTCACTCAAGCGTATTGCGGGTACAGTGATCTCGTTTTCCCGCACAAACGGAGAAGCACACCAAAGAATACATCACGCATCTGGTGCAGTCTGCTTACTATGA  
TACGGAGAAGGATATCGTTTCAGTTGCAGGCCGATCCACGCCTGTTTGAACCTCTATCAGTTTGACCGGAAAGTGCTGTTGCAGCTCAAGGCCATCAATGCCCTG  
AAGCGCCGGGAGTCCGCTCAGGCTCTTTATACCTTTATAGAGAGTCTGCCGCGGGATCCTGCACCGATATCACTGGCGCGCCTGCGGGCCCGTCTGAACCTTAA  
ATCCCCGGTATTCTCACAGAACCAGACAGTCAGGCGTGCCATGGAGCAGCTCCGGGAGATTGGCTATCTGGATTACACTGAGATCCAGCGGGGACGTACAAAA  
CTCTTCTGCATTACTACCGCCGGCCCAAGTTAAAGCCACCTCATGATGAGAGTGCGGAGAACCCGCAGCTGCCTGCCGCAACTGGTGAAGTCAGTCCGGAG  
ATGGCCGAAAAACTGAAACTTCTCGAGAAACTGGGCATCACGCTTGATGACCTGGAGAAACTCTTTAAATCCCGCTGA

>pCP046281 (CP046281)

CTGTTTGAAGAGGTGGATAAATCCTCGGGTGAAGTGGTTACCCTTACGCCAAATGCAGCCAATACAGTGCAGCCAGTGGCACTGATGCGGCTGGGAGTGTTTG  
TTCCTACGCTTAAATCACTGAAAAACAGCAAAAGAAATACACTTTCCCGGACTGATGCGACGGAAGAACTGACACGCCTGGCTCTCGCCAGAGCTGAAGGGT  
TTGATAATGTTGAAATCAACGGCCCTCGCCTGGATATGGATAATGACTTCAAGACATGGGTAGGAGTACTCCATTCTTTGCCCGGCATAAGGTTATCGGCGACA  
AAGTTGAACTGCCGTTTGTGCAATTCGCCAAACTCTGCGGGATCCCCTCGAGTCAGTCATCACGTAAGCTCCGGGAGCGTATCGGCCCTTCGCTCAAGCGTATT  
GCGGGTACAGTGATCTCTTTTTCCCGCACACGAGGAGCAGCAACCAAAGAGTACATCACGCATCTGGTGCAGACGGCTTACTATGATACGGAAAAGATATTG  
TTCAGTTGCAGGCCGATCCACGCCTGTTTGAACCTCTACCAGTTTGACCGGAAAGTCTGCTGCAGCTCAAGGCCATCAACGCCCTGAAGCGCCGGGAGTCCG  
CTCAGGCCCTTTATACCTTTATAGAGAGCTGCCACGGGATCCGGCGCCGATATCACTGGCGCGTCTGCGGGCCCGTCTGAACCTGAAATCCCCTGTGTTCTCG  
CAGAACCAGACGGTGAGGCGTGCCATGGAGCAGCTCCGGGAGATTGGCTACCTGGATTACACCGAGATCCAGCGGGGACGTACCAAACCTTTCTGCATCCAC  
TACCGGCGCCCCAAGTTAAAGCCACCTCATGATGAGAGTGACAGAGAATCCGCAGCTGCCTGCCGACACAGGTGATGTCAGTCCGGAGATGACTGAAAAACTG  
AAAGTCCTCGAGAAACTGGGCATCACGCTTGATGACCTGGAGAAACTCTTCAAATCCCGCTGA

>pC45-p2 (LT991959)

GTGGATAAATCCTCCGGTGAAGTCGTAACCTGACGCCTAATGCCAGTAATACAGTGCAACCTGTGGCATTGATGAGGCTTGGAGTGTTTGTTCCTACGCTTAA  
ATCGCTGAAAAACAGCAAAAAAACACACTTCCCGTACTGATGCTACGGAAGAACTAACGCGCCTGTCTCTCGCCAGAGCTGAAGGATTTGATAAGGTGGA  
GATCACTGGTCCCCGCCTGGACATGGATAATGACTTTAAGACTTGGGTAGGGGTGATTCATTCCTTTGCCCGTCATAAAGTTATCGGTGATAAAGTTGAACTGCC  
GTTTGTTCGAGTTCGCAAACTATGCGGGATCCCTTCAAGTCAGTCTTCACGCAGGCTCCGGGAGCGTATCAGCCCTTCGCTTAAACGAATTGCGGGTACCGTTA  
TCTCGTTTTACGCCTAATGAAAAGCACACCAAAGAGTACATCACACATCTGGTGCAGTCTGCTTACTACGATACTGAGAAAGATATCGTCCAGTTGCAGGCT  
GACCCACGCCTGTTTGAGCTTTATCAGTTCGACCGTAAAGTACTTTTGCAGCTGAAAGCCATCAATGCTCTGAAGCGCAGGGAGTCCGCGCAGGCTTTATATAC  
TTTTATAGAGAGCCTGCCACGGGATCCTGCGCCAATATCTCTTGCAGTCTTCGGGCACGACTGAACCTGAAGTCCCCTATATTCTCGCAGAACCAGACGGTAA  
GGCGTGCTATGGAGCAGCTCCGGGAGATTGGCTATCTGGATTACACTGAGATCCAGCGGGGACGTACAAAACCTTCTGCACTTACTATCGCAGGCCCAAATTA  
CAGCCACCTCATGATGCAAGCGCAGAGAACCCGAAGCTGCCTGCCACACCTGGTGATGTCAGTCCAGAGATGGCTGAGAACTGGCCCTACTCGCGAAGCTG  
GGCATCACTCTTGATGACCTGGAAAACTCTTCAAACTCGCTGA

>pSA20051401.2 (CP030198)

GTGGACAAATCCTCCGGCGAAGTGGTCAACCTCGTACCAAACAGCAATAATACCGTACAGCCGGTGGCGTTAATGCGTCTGGGGATGTTTGTTCACGCTTA  
AGTCGCTGAAGAACAGTAAAAAATACGTTTTCTGTACGGATGCAAGTGACGAGCTGACGCGTCTTCTCTTGCCAGGGCTGAAGGTTTTGATAAGGTGCA  
GATCACCGGCCACGGCTGGATATGGATAACGATTTCAAGACCTGGGTGGGGATCATTATTCTTTTGCCAGACATAACCTTATCGGCGATAAGGTGGAGCTTC  
CGTTCGTCGAGTTCGTAAACTCTGCGGGATCCCTTCAAGTCAGTCTCTCGTAAGCTTCGTGAACGTATCAGTCTTCCCTTAAACGTATCGCCGGGACGGTC  
ATCTCATTTTCACGTACGACCGAAAAGCACACCAAAGAGTACATTACGCATCTGGTACAGTCGGCTTACTATGATACGGAGAAGGATATCGTGCAGCTGCAGGC  
CGACCCACGCCTGTTTGAAGTGTACCAGTTTGACCGGAAGGTACTTCTGCAGCTCAAGGCGATCAATGCCCTTAAAGCGCAGGGAATCGGCTCAGGCACTTTAT  
ACTTTTATAGAAAGTCTTCTCAGAATCCGGCACCGATATCGCTGGCTCGCCTGAGGGCCCGTCTTAACCTGAGGTCACCGGTTTTTTCACAGAACCAGACGGT  
GAGGCGTGCCATGGAACAGCTCCGGGAGATTGGCTATCTGGATTACACAGAAATCCAGCGGAGACGCACAAAACCTTCTGCACTTACTACCGCCGTCCCAAA  
TTAAAGCCACCTCATGATGAGAGTGCAGGAGAACCCGCAGCTGCCTGCCACACCGGGTATGTCAGTCCGGAGATGGCTGAAAACTGAAACTTCTCGAGAAA  
CTTGGCATCACCTCGATGACCTGGAAAACTCTTCAAATCCCGCTGA

>pM12X01451 (CP017473)

ATGCGGCTTGGTGTTTTCGTTCCCACGCTCAAATCTCTGAAAAACAGTAAAAAGAATACGCTTTCCCGTACGGATGCTACTGAAGAGCTGACGCGGCTTTCTCT  
TGCCAGAGCTGAAGGCTTTGATAAGGTGAGATCACCGGCCACGGCTTGATATGGATAACGATTTCAAGACCTGGGTGCGGATCGTCCATTCTTTGCCCGG  
ATAAGGTTATTGGGGATAAAGTGGAACTTCCGTTCGTCGAGTTCGCTAAACTGTGTGGTATCCCTTCAAGCCAGTCGTCCCGCAAACCTTCGGGAGCGCATTAGC



CCATCGCTTAAACGCATTGCGGGTACCGTGATTTCCCTTTTCCCGCACTACCGAAAAGCACACCAAAGAGTACATCACGCACCTGGTCCAGTCTGCCTACTACGA  
TACGGAGAAAGACGTGGTTCAGTTACAGGCAGATCCGCGTTTATTTGAACTTTATCAGTTTGACCGCAAAGTACTTCTGCAACTCAAGGCTATCAATGCCCTGA  
AGCGCAGGGAATCAGCTCAGGCACTCTACACTTTTATTGAGAGTCTTCCGCGGGATCCGGCTCCTATCTCGCTGTGCGGCCTCCGAGCCCGTCTGAATCTGAAA  
TCTCCGGTCTTTTCTCAGAACCAAACGGTAAGGCGTGCCATGGAGCAGCTGCGTGACATAGGATACCTGGATTACACCGAGATCCAGCGCGGCCGGACAAAAG  
CTTTTCTGTATCCACTACCGGCGTCCCAAGCTGAAGGCACCTAACGATGAAAGTGCAGAAAACCCGCAGCTGCCAGCGGCGAAGCGGGATGTTAGTCCGGAA  
ATGGCTGAAAACTGGCTGTCCTGGAAAAGCTGGGGATCACGCTTGATGATCTGGAGAAGTTGTTCAAAACATCCTGA

>pDSMZ16690 (CP017185)

GTGGATAAGTCCTCTGGCGAAATAGTTAACCTTACGCCTAACGGCAGCAACACGGTACAGCCCCTGGCGCTGATGCGGCTTGGTGTTTTCGTTCCAACGCTCA  
AGTCTCTGAAAAACAGTAAAAAGAATACGCTTTCCCGTACGGATGCTACGGAAGAGCTGACGCGCCTTTCCCTTGCCAGAGCTGAAGGTTTTGATAAGGTCGA  
GATCACAGGCCCGCGGCTTGATATGGATAATGATTTCAAACTTGGGTCCGGATCGTCCATTCCTTTGCCCGGCATAAGGTTATCGGCGATAAGGTGGAACCTCC  
GTTTCGTCGAGTTTCGCTAAATTGTGCGGTATCCCTTCAAGCCAGTCGTCCCGTAAACTTCGGGAGCGCATCAGTCCCTCGCTTAAACGCATCGCGGGCACCGTGA  
TCTCATTTTTCCCGCACTACCGAAAAGCATAACCAAAGAGTACATCACGCACCTGGTCCAGTCTGCCTACTACGATACGGAGAAAAGACGTGGTTCAGTTACAGGC  
GGATCCACGTTTATTCGAGCTTTATCAGTTTGACCGCAAAGTACTTCTGCAGCTCAAGGCTATCAATGCCCTGAAGCGCAGGGAATCTGCTCAGGCACTATATAC  
CTTTATTGAGAGTCTTCCGCGTGATCCGGCTCCTATCTCGCTGGCGCGCCTCCGGGCCCGCTGAATCTGAAATCACCTGTCTTTTACAGAACCAGACGGTAA  
GGCGTGCGATGGAGCAGCTGCGTGACATTGGATACCTGGACTACACTGAGATCCAGCGTGGCCGGACAAAGCTTTTCTGTATCCATTACCGGCGACCCAAGCT  
GAAGGCACCCAACGATGCAAGTGCGGAGAACCCGCAGCTGCCGCGGCGAAGCGGGATGTCAGTCCGGAAATGGCTGAAAACTCGCTGTCCTGGAAAAGC  
TGGGTATCACGCTTGATGATCTGGAGAAGCTGTTCAAAACATCATGA

>pYRW13-131 (CP050813)

ATGGATAGTGATAACTTCGATCTGAAAAAGTTGTTTGAGGAAGTGGATAAGTCTTCCGGGCGAAGTGGTTCAGCTCACTCCAAACAGCAATAATACCGTGCAAC  
CTGTGGCTCTGATGCGTCTTGGAGTATTCGTTCCGACGCTGAAGTCTCTGAAAAACAGTAAAAAGAACACTTTATCTACAACGGATGCAACGGAAGAGCTGAC  
TCGTCTTTCTCTGGCGAAAGCAGAGGGATTCGATAAGGTAGAAATTACCGGGCCTCGTCTGGATATGGATAATGATTTTAAAACCTGGGTAGGGATCATCCATTC  
CTTTGCAAAACATAAAGTCATTGGTGATAAAGTTCAGCTGCCTTTTGTGAGTTTGCCAAGCTGTGTGGGATCCCTTCCAGCCAGTCGTCCCGTAAACTCAGAG  
AGCGCATCAGCCCATCGCTGAAGCGTATTGCCGGTACCGTGATATCCTTTTCAAGAACAACCGATAAGCATAACGAAAGAGTACATCACCCACCTTGTGCAATCC  
GCCTATTACGACACTGAGAAAGATATCGTGCAGTTGCAGGCGGATCCAGATTGTTTGAATTGTATGAATTTGATAAAAAAGTGTCTTTTACAGCTGAAAGCTATT  
AATGCGCTGAAGCGGCGTGAGTCTGCTCAGGCGCTTTATACCTTATTGAAAGCCTCCCTAAGGATCCGGCGCCAATCTCACTCGCCCGCCTTCGTGCTAGGCT  
CAGCCTCAGGTCTCCTGTGTTCTCCAGAATCAGACGGTACGTAAGGCCATGGCCCAGCTTAAAGAAATCGGTTATCTCGATTACACGGAGATACAGCGGGGC

CGTAGCGTGCTCTTCAGCGTCCACTACCGGAGACCTAAGCTGAAAAGCACCAAAGGATGCCAGCGAGGAAAACCCCTTCAACACCCGGGAAGCCCACAGATCTC  
AGCCCTGAAATGGCCGAGAAGCTGGAAGTCCTTAAGAAGCTTGGTATCAGTCTTGAAGACCTGGAGAAGTTGTTTCGGAAACAAGTAG

>p888-76-1 (CP019446)

ATGGATAAGTCTACTGGTGAACCTATTACCCTCACCCCAAATTCTAACAATACGGTTCAGCCAGTCGCGCTAATGCGACTTGGTGTTCGTTCCAACACTCAAG  
TCACTGAAAAATAGTAAAAATAATACGTTATCAAAAAGCTGATGCGACCGAAGAGCTGACGCGTTTGTCTTGGCCAAAGCGGAGGGTTTCGACAAAGTCGAG  
ATCACAGGTCCGAGGCTGGATATGGATAATGACTTTAAAAGCTGGGTTCGGTATTATCCACTCCTTTGCCAAACATAAAGTGATAGGCGATAAGGTTTCAGCTATCA  
TTTGTTGAATTTGCCAAACTCTGTGGGATCCCATCAAGCCAGTCCTCACGCAAGCTCAGGGAGCGCATCAGCCCCTCACTCAAGCGTATAGCAGGCACGGTAA  
TATCATTTTTCCCGCACGACTGAAAAGCATACAAAAAGAGTATATAACTCATCTGGTACAGTCCGCGTCTATGATACCGAACGTGATATCGTGGTTCTTCAGGCGG  
ATCCGCGGTTATTGAACTTTATGAGTTTGATAAAAAAGTACTTCTTCAGCTTAAGGCTATAAACGCGTTGAAGCGCCGCGAGTCTGCTCAGGCGCTATATACT  
TTATAGAGAGTCTGCCAAAAGATCCTGCCCCATATCGCTGGCACGCTTAAGAGCAAGACTGAGCCTGAAATCACAGTATTTTCACAAAATCAGACCGTTCGC  
CGGGCTATGCAGCAGCTCAAAGAGATTGGCTACCTTGATTATACCGAGATGCAGCGCGGACGCAGCGTGCTGTTTAAAGTACATTATCGTCGTCCCAAGCTCAA  
AGCACCTAAAGACGCTAGCGAAGAGAATCCTAAGCTGACTGGCAGTCCAGCAAGCCCTCCCGATCAAGAGCTTACCGAAAAGCTCCAGGTTCTTGAAAAGCT  
TGGCATCACCATGGACGACTTGAAAAACTCTCCGTAATAAGTAA

>pCP045299 (CP045299)

TTGGAAAACGAAAATAAAGATCTAAAAAAGCTGTTTGAAGAAGTGGATAAATCCACTGGCGAGCTGATCACGCTCACTCCAAATGCTAATAATACGGTTCAGC  
CAGTTGCACTGATGCGGCTGGGTGTTTTCGTCCCAACGCTTAAGTCTTTGAAAATAGTAATAAAAATACATTATCTAAGACTGATGCCACTGATGAGCTTACTC  
GTTTGTCAATCGCTAAAGCGGAGGGTTTCGATAAAGTCGAGATCACGGGTCCAAGGCTGGACATGGATAATGATTTTAAAAGCTGGATCGGTATTATTCCTCC  
TTCGCTAAATATAAAGTGATTGGTGATAAGGTTTCAGTTGTCGTTTGTGAAATTTGCCAAACTTTGTGGTATCCCATCCAGTCAGTCCTCACGAAAGCTTAGGGAG  
CGTATCAGCCCCTCATTAAAACGTATCGCGGGTACTGTAATATCATTCTCACGCACGACTGAAAACATACCAAAGAATACATAACGCATTTGGTACAGTCCGCA  
TTTTACGATACTGAGCGTGATATCGTGGTGCTGCAGGCAGACCCTCGCTTATTCGAGCTCTATGAATTTGATAAAAAAGTTCTTCTCCAGCTTAAGGCAATCAAT  
GCATTGAAACGCCGCGAATCAGCGCAGGCGTTATATACATTCATTGAAAGCCTACCAAAGATCCTGCTCCTATATCATTGGCTCGCTTACGTGCAAGGCTGAG  
CCTGAAATCACCTATTTCTCGCAAAAATCAGACCGTTCGACGGGCGATGGAGCAACTTAAAGAGATTGGTTATCTTGATTACACTGAGATGCAACGGGGTTCGTA  
GCGTGCTGTTCAACGTACATTATCGCCGCCCTAAGCTAAAAGCCCCCAAAGACGAAAGCGAAGAGAATCCCAGACAGTCAGTGAGCTCTACGAGCATCCTTGA  
TCCTGAACTCAGCGAAAAACTCCAGCTCCTTAAAAAGTTAGGAATCACGATGGACGATCTGAAAAACTATTCCGTAGTAAGTAA

>pMSR2B (CP024638)

TTGTTTGAAGAAACGGACAAAATTACAGGTGAGGTGATCACGCTAACGCCGAATGCAAATAATACCGTTCAACCCGTTGCATTGATGAGGCTCGGTGTATTGT

CCCTACGCTTAAGTCATTGAAAAACAGTAAAAATAAAACCTTTTCTACCACTGATGCAACGGAAGAATTGACCCGACTTTCGCTGGCTAAAGCAGAGGGATTT  
GACAAAGTCGAGATAGTCGGTCCGCGCCTGGATATGGACAATGATTTCAAGACCTGGGTTCGGGATCATTCACTCTTTTGCCAAACATAAAGTCATCGGTGACA  
AGGTACAGCTTCCCTTCGTTGAATTTGCCAAACTCTGCGGAATCCCCTCCAGCCGTTCTTCCAAAAAACTCAGAGAGCGCATCAGTCCGTCTCTGAAGCGTATC  
GCAGCGACAACGATCTCCTTTACCAGCAATATGGGGGAAGATGGTAAGGAATACATCACGCATTTGGTTTCAGTCAGCCTATTACGATACCAAAAAAGATATCGT  
GATTTTACAAGCGGATCCCAAACCTGTTTGAGCTGTATGAGTTTGATCGTAAGGTGCTTTTGCAGCTTAAAGCGATTAATGCGCTAAAGCGACGTGAGTCTGCTC  
AGGCGCTGTACACCTATATCGAAAGCCTGCCAAAGAATCCGGCACCGATCTCACTGGCTCGCTTGCCTGACAGGCTGAACCTGAAGTCACCGGTGTTTTCGCA  
AAACCAGACGGTACGGCGTGCTATGGAGCAACTTAAGGAGATTGGATATCTCGATTACTCCGAGGTGCAACGGGGGCGTAGCGTCTATTTAATGTGCATTATC  
GTCGGCCAAAGCTGAAAGCGCCCAGGAACGAGAGTGCTGAAAACGCACAACCACAGTGCCTGTACACCTGCTGAACCTGTTGATGTGGAGCTTCAGGAA  
AAGCTCAACCTTCTGAGTAAGTTAGGCATTTCTATGGCCGATCTCGAAAAACTCTTCAAAGGCAAATAA

>pPAT9B02 (CP002435)

GTGGACAGCGAAAATCTTGACCTCAAAAACTGTTTGAAGAAACGGACAAAAATACAGGTGAGGTGATCACGCTAACGCCGAACGCGAATAATACCGTTCAA  
CCGGTTGCGTTGATGAGGCTCGGCGTATTTGTTCTACTCTTAAGTCACTGAAAAATAGTAAAAATAAAACCTTCTCGACGACAGATGCGACGGAGGAATTAAC  
CCGACTGTCTCTGGCTAAGGCCGAGGGGTTGATAAAGTTGAGATCGTGGTCCACGACTTGATATGGATAATGATTTCAAGACATGGGTTCGGGATCATTCAAT  
CCTTTGCCAAGCATAAAGTCATCGGAGACAAGGTACAGCTTCCCTTCGTCGAATTTGCCAAACTCTGCGGTATCCCCTCCAGTCGTTCCCTCTAAGAAGCTCAGA  
GAGCGTATTAGCCCGTCTTTAAAGCGTATCGCGGCGACAACCTATCTCCTTCGCCAGCAATATGGGTGAAGATAGTAAGGAATACATCACCCATTTAGTGCAGTCA  
GCTTATTACGATACCAAAAAGGATATCGTGATTTTGCAGGCGGATCCTAAGCTGTTTGAGCTATATGAGTTTGATCGTAAAGTACTTTTACAGCTTAAAGCGATC  
AATGTTCTGAAACGCCGGGAATCAGCCCAGGCGCTATATACGTATATCGAAAGCCTGCCGAGGAATCCCGCTCCCATCTCTCTGGCTCGCTTGCCTGACAGGTT  
GAATCTCAAGTCACCCGTTTTTTTCGAAAACCAGACGGTACGACGGGCGATGGAGCAACTTAAGGAGATTGGTTATCTCGATTACTCTGAGGTTTCAGCGGGGG  
CGTAGCATCTATTTTCATGTGCATTATCGCCGGCCAAAGCTGAAAGCGCCGAAGAACGAGAGTGCTGAAAACCCACAACCGCCAGTGCCCGTCACACCTGCA  
GAACCGGTTGATGCTGAGCTTCAGGAAAAACTCAATCTATTGAATAAATTAGGAATTTCCATGGCTGACCTCGAGAAGCTCTTCAAAGGAAAATGA

>pPSP-057 (CP010325)

ATCGTTACTCTGACGCCGAATGCCAACAATACTGTGCAGCCTGTGGCACTGATGCGCCTAGGCGTATTTGTCCCTACGCTTAAAGTCCTTAAAAAACAGTAAGAA  
AAACACATCTTCAATAACCGATGCGACCGAGGAACTGACGCGTCTGTCTCTTGCAAAGCAGAAAGGCTATGAAAAGGTTGAGATAGTCGGTCCGCGCTTGGAT  
ATGGATAACGATTTCAAGACCTGGGTTGGGATCATCCATTCCTTTGCAAAGCACAAAGACAAGGTCATTGGCGACAAGGTACAGCTCTCATTGTAGAGTTTGC  
TAAGCTCTGCGGCATCCCCTCAAGCCGCTCCTCAAAGCAGCTCAGAGAACGTATCAGCCGCTCTCTGAAGCGTATTGCCAGCACCACCATCTCTTTCTTTCAA  
AAAGCGGCGACGACGAAAAGAATACATCACGCATTTGGTCCAGTCTGCTTTTTACGATACCAAAAAAGATATTGTTATCCTGCAGGCTGACCCAAAGCTTTTT

GAGCTCTATGAGTTTGATCACAAGGTGTTACTGCAGCTCAAGGCGATCAACGCGCTTAAACGCCGTGAGTCCGCTCAGGCGCTCTATACCTACATTGAAAGCCT  
TCCAAAGAACCCGGTTCTATCTCCCTGGCGCGTCTTCGCGAAAGGCTGAATCTGCGCTCTCCTGTGTTTTTCGAGAACCAGACAGTACGCCGTGCGATGGAG  
CAGCTTAAAGAGATTGGTTATCTGGACTATAGCGAAGTTCAGAAGGGACGCAGCGTCTACTTCCAGGTCCATAATCGCTATCCAAAGCTCAGAGCGCCCAAGA  
CGGAGCAGCTGGAATCACCGAAGGTAACAACGAAAACAAAAGAGCTACTCGACCCGCAACTGCAGGAAAAGATTGAACTTCTCGATAAGCTCGGTATTTCTC  
TTCAAGATCTGGAAAAGATTTTTAAGTCTCAGTAA

>pCP060163 (CP060163)

ATCGTACTCTGACGCCGAATGCCAACAATACTGTGCAGCCTGTGGCACTGATGCGCCTAGGCGTATTTGTCCCTACGCTTAAGTCCTTAAAAAACAGTAAGAA  
AAACACATCTTCAATAACCGATGCGACCGAGGAAGTACGCGTCTGTCTTTGCAAAGCAGAAGGCTATGAAAAGTTGAGATAGTCGGTCCGCGCTTGGAT  
ATGGATAACGATTTCAAGACCTGGGTTGGGATCATCCATTCCTTTGCAAAGCACAAAGACAAGGTCATTGGCGACAAGGTACAGCTCTCATTGTAGAGTTTGC  
TAAGCTCTGCGGCATCCCCTCAAGCCGCTCCTCAAAGCAGCTCAGAGAACGTATCAGCCCGTCTCTGAAGCGTATTGCCAGCACCACCATCTCTTTCTCTTCAA  
AAAGCGGCGACGACGCAAAGAATACATCACGCATTTGGTCCAGTCTGCTTTTTACGATAACAAAAAGATATTGTTATCCTGCAGGCTGACCCAAAGCTTTTT  
GAGCTCTATGAGTTTGATCACAAGGTGTTACTGCAGCTCAAGGCGATCAACGCGCTTAAACGCCGTGAGTCCGCTCAGGCGCTCTATACCTACATTGAAAGCCT  
TCCAAAGAACCCGGTTCTATCTCCCTGGCGCGTCTTCGCGAAAGGCTGAATCTGCGCTCTCCTGTGTTTTTCGAGAACCAGACAGTACGCCGTGCGATGGAG  
CAGCTTAAAGAGATTGGTTATCTGGACTATAGCGAAGTTCAGAAGGGACGCAGCGTCTACTTCCAGGTCCATAATCGCTATCCAAAGCTCAGAGCGCCCAAGA  
CGGAGCAGCTGGAATCACCGAAGGTAACAACGAAAACAAAAGAGCTACTCGACCCGCAACTGCAGGAAAAGATTGAACTTCTCGATAAGCTCGGTATTTCTC  
TTCAAGATCTGGAAAAGATTTTTAAGTCTCAGTAA

>pCP032704 (CP032704)

GTGGCCAGCGACAATCTTGACTTAACAAAGCTTTTTGAAGAAAAAGACACGAAATCCGGGGAAATCGTAACCCTGACGCCGAATGCCAATAATACCGTGCAG  
CCGGTGGCACTGATGCGCCTGGGCGTATTTGTCCCTACGCTTAAGTCGTTAAAAAACAGCAAGAAAAACACCTCTTCAACAACCGATGCGACCGAGGAGTTG  
ACGCGTCTGTCACTTGCGAAAGCGGAAGGTTATGAAAAGTTGAGATAGTCGGCCCGCGCCTGGATATGGATAATGATTTCAAGACCTGGGTCCGGATCATCC  
ATTCCTTTGCAAAGCACAAAGACAAGGTCATTGGCGACAAGGTACAGCTCTCATTGTAGAGTTTGCCAAGCTCTGCGGCATTCCCTCAAGTCGCTCCTCAA  
GCAGCTCAGAGAGCGTATCAGCCCGTCTTTGAAGCGTATTGCCAGCACTACCATCTCTTTCTCTTCAAAAAGCGGCGACGACGCAAAGAATACATCACGCAT  
CTGGTCCAGTCTGCTTTTTACGATAACAAAAAGGACATTGTTATCCTGCAGGCTGACCCGAAGCTTTTCGAGCTCTACGAGTTTGATCACAAGGTGTTACTGCA  
GCTTAAGGCGATCAACGCGCTTAAACGCCGTGAGTCCGCTCAGGCGCTCTATACCTACATCGAAAGCCTTCCCAAGAACCCGGCCCTATCTCCCTGGCGCGC  
CTTCGCGAAAGGCTGAATCTGCGTTCTCCTGTGTTTTTCGAGAACCAGACAGTGCGCCGTGCGATGGAGCAGCTCAAAGAGATTGGTTATCTGGACTATAGCG  
AAGTTCAGAAGGGACGCAGCGTCTACTTCCAGGTGCATAATCGTTATCCAAAGCTCAGAGCGCCCAAGACGGAGCAGCTGGAAGCACCGAAGGCAACAACG

AAAACAAAAGAGCCACTCGATCCGCAACTGCAGGAAAAGATTGAACTTCTGGATAAGCTCGGTATTTCACTTCAGGATCTGGAGAAGATTTTTAAGTCTCAGTGA

>p505108-T6SS (KY978630)

GTGGCTGATGAAGAGAACATCAATATCAACGATGCCTTCAGTGAAGTGGATCGTAAAACCGGCCGAAGTGGTCACGCTGATGCCGAACCGTAACAACACGGTACAGCCGGTCGCGCTGATGCGCCTTGGCCTGTTTGTCCCGACGCTGAAATCCACCGCCCGTGGCCGTAAAGGGCAGATGTCCTCGATGGATGTGACAGAAGAGCTGAAACAGCTCTCGCTCGTTAAATCTGAAGGCTACGAGAATATCAAAATCACCGGTGCCCGCCTGGACATGGATAACGACTTCAAAACCTGGGTCGGGATCATCCATGCTTTCGCCAAATACAACGTGCTTGGCGACAGCGTGACGCTGCCGTTTGTGGAGTTCGTGAAGCTGTGCGGTATTCCTTCGGCGCGTTCGTTCGGCAAAAGCTGCGTAAACGTCTTGATGCCTCGCTGACCCGTATCGCCACTAATACCATCTCCTTCAGCAATAAAGAAGGGGAGTATTACGTACGCACCTGGTGCAGTCCGCCAAGTACAGTGCCAAAAGGATGAAGTGACGCTGCAGGCCGATCCGAAAATCTTTGAGCTATAACCAGTTCGATAAAAAAGTTCTGCTGCAGCTGCGGGCCATTAAATGAGCTGTTCGCGTAAGGAATCGGCTCAGGCGCTGTATACGTTTATTGAGAGCTTGCCGCCTAACCTGCGCCTGTCTCCCTTGACGCCTGCGCGCGCGCC TGAATCTCACCTCCCGCACCATCACGCAGAACTCCACCGTGCGTAAGGCGATGGAGCAGCTCAAGGAGATTGGCTATCTCGATTACACCGAGATCAAGCGCGG GCGGGTAGTCTACTTTCATATCCACTACAGAAGGCCAAAACCTTCGCCACAAAGCCTGCCAGGCGCGCTGCCTGCCGGTGACGAGTTGCCGGTAGAAAACAG CGCTGTACCGGAAGAGCAGGGCGAAATGGTGATGCTGACCAAAGAAGAGCTGGCGCTGCTGGAAAAAATCCGTAAAGGCCAGATCTGA

>pGW2 (CP028976)

GTGGCTGATGAAGAGAACATCAATATCAACGATGCCTTCAGTGAAGTGGATCGTAAAACCGGCCGAAGTGGTCACGCTGATGCCGAACCGTAACAACACGGTACAGCCGGTCGCGCTGATGCGCCTTGGCCTGTTTGTCCCGACGCTGAAATCCACCGCCCGTGGTCGTAAAGGGCAGATGTCCTCGATGGATGTGACAGAAGAGC TGAAACAGCTCTCGCTCGTTAAATCTGAAGGCTACGAGAATATCAAAATCACCGGTGCCCGCCTGGACATGGATAACGACTTCAAAACCTGGGTCGGGATCAT CCATGCTTTCGCCAAATACAACGTGCTTGGCGACAGCGTGACGCTGCCGTTTGTGGAGTTCGTGAAGCTGTGCGGTATTCCTTCTGCGCGTTCGTTCGGCAAAG CTGCGTAAACGTCTTGATGCCTCGCTGACCCGTATCGCCACTAACACCATCTCCTTCAGTAATAAAGAAGGGGAGTATTACGTTACGCACCTCGTGCAGTCTGC CAAATACAGCGCCAAAAGGATGAGGTGACGCTGCAGGCCGATCCGAAAATCTTTGAGCTATAACCAGTTCGATAAAAAAGTTCTGCTGCAGCTGCGGGCCATT AATGAGCTGTTCGCGTAAGGAATCTGCTCAGGCGCTGTATACGTTTATTGAGAGCTTGCCGCCTAACCTGCGCCTGTCTCCCTTGACGCCTGCGCGCGCGCCT GAATCTCACCTCCCGCACCATCACGCAGAACTCCACCGTGCGTAAGGCGATGGAGCAGCTCAAGGAGATTGGCTATCTCGATTACACCGAGATCAAGCGCGGG CGGGTAGTCTACTTTCATATCCACTACAGAAGGCCAAAACCTTCGCCCGCAAAGCCTGCCAGGCGCGCTGCCTGCCGGTGACGAGTTGCCGGTAGAAAACAGC GCTGTACCGGAAGAGCAGGGCGAAATGGTGATGCTGACCAAAGAAGAGCTGGCGCTGCTGGAAAAAATCCGCAAAGGGAAGATCTGA

>pCS2 (CP012255)

GTGGCTGATGAAGAGAACATCAATATCAACGATGCCTTCAGTGAAGTGGATCGTAAAACCGGCCGAAGTGGTCACGCTGATGCCGAACCGTAACAACACGGTAC

CAGCCGGTTCGCGCTCATGCGCCTTGGCCTGTTTGTCCCGACGCTGAAATCCACCGCCCGTGGCCGTAAAGGGCAGATGTCCTCGATGGATGTGACAGAAGAGC  
TGAAACAGCTCTCGCTCGTTAAATCTGAAGGCTACGAGAATATCAAAATCACCGGTGCCCGCTGGACATGGATAACGACTTCAAACCTGGGTTCGGGATCAT  
CCATGCTTTCGCCAAATACAACGTGCTTGGCGACAGCGTGACGCTGCCGTTTGTGGAGTTCGTGAAGCTGTGCGGTATTCTTCGGCGCGTTCGTTCGGCAAAG  
CTGCGTAAACGTCTTGATGCCTCGCTGACCCGTATCGCCACTAATACCATCTCCTTCAGCAATAAAGAAGGGGAGTATTACGTCACGCACCTGGTGCAGTCCGC  
CAAGTACAGTGCCAAAAAGGATGAAGTGACGCTGCAGGCCGATCCGAAAATCTTTGAGCTGTACCAGTTCGATAAAAAAGTTCTGCTGCAGCTGCGGGCCAT  
AAATGAGCTTTCGCGTAAGGAATCCGCTCAGGCGCTGTATACGTTTATTGAGAGCCTGCCGCCTAACCCGGCGCCGGTCTCGCTTGCACGCCTGCGCGCGCGC  
CTGAATCTCACCTCCCGCACCATCACGCAGAACTCCACCGTGCGTAAGGCGATGGAGCAGCTCAAGGAGATTGGCTATCTCGATTACACCGAGATCAAGCGCG  
GGCGGGTAGTCTACTTTCATATCCACTACAGAAGGCCAAAACCTCGCCACAAAGCCTGCCAGGCGCGCTGCCTGCCGGTGACGAGTTGCCGGTAGAAAACA  
GCGCTGTACCGGAAGAGCAGGGCGAAATGGTGATGCTGACCAAGAAGAGCTGGCGCTGCTGGAAAAAATCCGCAAAGGGAAGATCTGA

>pCMA1 (CP013941)

GTGGCTGATGAAGAGAGCATCAATATCAACGACGCCTTCAGTGAGCTGGACCGTAAAACCGGCGAAGTGGTCACGCTGATGCCGAACCGCAATAACACCGTG  
CAGCCGGTTCGCGCTGATGCGTCTTGGCCTGTTTGTCCCGACGCTGAAATCCACCGCCCGGGCCGCAAAGGCCAGATGTCCTCGATGGACGTAACGGAAGAG  
CTTAAACAGCTCTCGCTCGTTAAATCCGAAGGCTACGAGAATATCAAAATCACCGGCGCCCGCCTGGATATGGATAATGATTTCAAACCTGGGTTCGGGATCAT  
CCATGCCTTCGCCAAATATAATGTGCTTGGCGACAGCGTCACGCTGCCGTTTGTGGAGTTCGTGAAGCTGTGCGGCATTCTTCGGCCCGTTCATCTGCAAAGC  
TGCGTAAGCGTCTCGATGCTTCGCTGACCCGTATCGCCACCAATACCATCTCTTTCAGCAACAAGGAAGGAGAGTACTACGTTACGCACCTTGTGCAGTCTGCC  
AAATACAGCGCCAAAAAGGATGAAGTGACGCTGCAGGCCGATCCGAAAATCTTCGAGCTGTACCAGTTCGACAAAAAAGTTCTGCTGCAGCTGCGTGCCATT  
AATGAATTGTGCGCAAAGAGTCCGCCAGGCGCTGTATACGTTTATTGAGAGCCTGCCGCCTAACCCCTGCGCCGGTCTCGCTTGCACGCCTGCGCGCGCGCC  
TGAATCTCACCTCCCGCACCATCACGCAGAACTCCACCGTGCGTAAGGCGATGGAGCAGCTCAAGGAGATCGGTTATCTCGATTACACCGAGATTAAGCGCGG  
GCGGGTGGTCTACTTTCATATCCACTACAGAAGGCCAAAACCTCGCCACAAAGCCTGCCAGGCGCGCTGCCTGCCGGTGATGAACTGCCGGTGGAAAACAG  
CCCCGTAGCGGAAGAGCAGGGCGAAATGGTGATGCTGACCAAGAAGAGCTGGCGCTGCTGGAAAAAATCCGCAAAGGGACAGATCTGA

>pCP006732 (CP006732)

GTGGCTGATGAAGAGAGCATCAATATCAACGACGCCTTCAGTGAGCTGGACCGTAAAACCGGCGAAGTGGTCACGCTGATGCCGAACCGCAATAACACCGTG  
CAGCCGGTTCGCGCTGATGCGTCTTGGCCTGTTTGTCCCGACGCTGAAATCCACCGCCCGGGCCGCAAAGGCCAGATGTCCTCGATGGACGTAACGGAAGAG  
CTTAAACAGCTCTCGCTCGTTAAATCCGAAGGCTACGAGAATATCAAAATCACCGGCGCCCGCCTGGATATGGATAATGATTTCAAACCTGGGTTCGGGATCAT  
CCATGCCTTCGCCAAATATAATGTGCTTGGCGACAGCGTCACGCTGCCGTTTGTGGAGTTCGTGAAGCTGTGCGGCATTCTTCGGCCCGTTCATCTGCAAAGC  
TGCGTAAGCGTCTCGATGCTTCGCTGACCCGTATCGCCACCAATACCATCTCTTTCAGCAACAAGGAAGGAGAGTACTACGTTACGCACCTTGTGCAGTCTGCC

AAATACAGCGCCAAAAAGGATGAAGTGACGCTGCAGGCCGATCCGAAAATCTTCGAGCTGTACCAGTTCGACAAAAAAGTTCTGCTGCAGCTGCGTGCCATT  
AATGAATTGTCGCGCAAAGAGTCCGCCAGGCGCTGTATACGTTTATTGAGAGCCTGCCGCCTAACCCCTGCGCCGGTCTCGCTTGCACGCCTGCGCGCGCGCC  
TGAATCTCACCTCCCGCACCATCACGCAGAACTCCACCGTGCCTAAGGCGATGGAGCAGCTCAAGGAGATCGGTTATCTCGATTACACCGAGATTAAGCGCGG  
GCGGGTGGTCTACTTTCATATCCACTACAGAAGGCCAAAACTTCGCCACAAAGCCTGCCAGGCGCGCTGCCTGCCGGTGATGAACTGCCGGTGAAAAACAG  
CCCCGTAGCGGAAGAGCAGGGCGAAATGGTGATGCTGACCAAAGAAGAGCTGGCGCTGCTGGAAAAAATCCGCAAGGGACAGATCTGA

>pCUNV1 (CP012258)

GTGGCCGATGAAGAGAGCATCAATATCAACGACGCCTTCAGTGAGCTGGACCGTAAAACCGGCGAAGTGGTCACGCTGGTTCCCAACCGTAACAACACGGTG  
CAACCGGTGCGGCTGATGCGACTGGGCCTGTTTGTTCGACGCTGAAATCCACCGCCCGTGGCCGCAAAGGCCAGATGTCTCGATGGACGTGACGGAAGAG  
CTTAAGCAGCTTTCGCTGGTCAAATCGGAAGGCTACGAAAATATCAAGATCACCGGCGCCCGTCTGGACATGGATAACGACTTCAAAACCTGGGTGCGGATCA  
TCCATGCCTTCGCCAAATATAATGTGCTTGGCGACAGCGTCACGCTGCCTTTTGTGGAGTTCGTGAAGCTGTGCGGTATTCCGTCGGCCCGTTCGTCAGCAAAA  
CTGCGTAAGCGTCTTGATGCCTCGCTGACCCGTATCGCCACCAACAATCTCCTTCAGTAATAAAGAAGGGGAGTATTACGTCACGCATCTGGTGCAGTCCGC  
CAAGTACAGCGCTAAAAAGGATGAGGTGACGCTACAGGCCGATCCAAAAATCTTCGAACTGTATCAGTTCGACAAAAAAGTTCTGCTGCAGCTGCGCGCCATT  
AATGAATTGTCGCGCAAAGAGTCCGCCAGGCGCTGTATACGTTTATTGAAAGCCTGCCGCCAACCCGGCGCCGGTCTCGCTGGCACGCCTGCGCGCGCGTC  
TGAATCTCACCTCACGCACCATCACGCAAAACTCCACCGTGCCTAAGGCAATGGAACAGCTCAAGGAGATCGGTTATCTCGATTACACCGAAATCAAGCGCGG  
ACGGGTGGTGTACTTTCATATCCACTACAGAAGGCCAAAGCTGCGTCCACAGAGCCTGCCAGGGGCGCTGCCTGCCGGTGATGAACTGCCGGTGAAAAACAG  
CCCCGTAGCGGAAGAGCAGGGCGAAATGGTGATGCTGACCAAAGAAGAGCTGGCGCTTCTGGAAAAAATCCGCAAGGGACAGATCTGA

>pCTU1 (FN543094)

CTGGACCGTAAAACCGGCGAGGTGGTCACGCTGGTTCCCAACCGTAACAACACGGTGCAGCCGGTTCGCGCTGATGCGCCTTGGCCTGTTTGTACCGACGCTG  
AAGTCCACCGCCCGCGGCCGAAAAGGCCAGATGTCTCAATGGACGTGACGGAAGAGCTTAAGCAGCTTTCGCTGGTAAAATCGGAAGGCTACGAAAATATC  
AAGATAACCGGCGCCCGTCTGGACATGGACAATGATTTTAAAACCTGGGTGCGGATCATTATGCCTTCGCCAAATATAATGTCCTTGGCGACAGCGTCACGCT  
GCCTTTTGTGGAGTTCGTGAAGCTGTGCGGTATTCTTCGCCCCGTTTATCTGCAAAGCTCCGTAAGCGACTTGATGCCTCGCTGACCCGTATCGCCACCAACA  
CCATCTCCTTCAGTAACAAAGAAGGAGAGTACTACGTCACGCACCTTGTGCAGTCTGCCAAGTACAGCGCCAAAAAGGATGAGGTGACGCTGCAGGCCGATC  
CAAAAATCTTCGAGCTCTATCAGTTCGACAAGAAAGTCCCTGCTGCAGCTGCGCGCCATTAATGAACTGTGCGTAAAGAATCCGCGCAGGCGCTGTATACGTTT  
ATTGAAAGCCTGCCGCCAACCCCGCCCCGATCTCGCTTGGCCGCTGCGCGCACGTCTGAATCTTACGTCCCGCACCATCACGCAAAACTCCACGGTGCCTA  
AAGCCATGGAGCAGCTCAAAGAGATCGGTTATCTGGATTACACCGAAATCAAACGCGGGGCGGGTGGTGTACTTTCATATCCACTACAGAAGGCCAAAACTTCG  
ACCACAAAGCCTGCCTGGCGCGCTGCCAGCCGGTGAAGAGTTACCGGTAGAAAACAGCGTCGTAGCGGAAGAGCAGGGCGAAATGGTGATGCTGACCAAAG



AAGAGCTGGCATTGCTGGAAAAATCCGCAAGGGCCAGATCTGA

>pCDU1 (CP012267)

ATGGTGAGTAAGCACCGGACATTAAGGACAGGAGACCCGCACGTGGCTGATGACGAGAGCATTAAATATCAATGACGCCTTCAGTGAGCTGGACCGTAAACT  
GGCGAACTCGTGACGCTGGTACCGAACCGCAATAACACGGTGCAGCCGGTTCGCGCTGATGCGCCTTGGCCTGTTCGTCCCAGCGCTGAAATCCACGGCCCGT  
GGTCGTAAGGGCCAGATGTCCTCTATGGATGTCCTGAAGAGCTTAAACAGCTCTCGCTGGTGAAGTCCGAAGGCTATGAGAATATTTAAATCACCAGCGCGC  
GCCTGGATATGGACAATGATTTTAAGACCTGGGTTGGGATCATCCATGCCTTCGCCAATAACAATGTCCTCGGTGACAGTGTGACGCTGCCGTTTGTGGAATTT  
GTGAAGCTGTGTGGTATCCCTTCTGCGCGTTCGTCCGCGAAGCTTCGCAAGCGTCTTGACGCTTCTCTACCCGCATCGCCACCAATACCATCTCCTTCAGTAA  
CAAAGAAGGGGAGTACTACGTCACGCACCTGGTGCAGTCCGCCAAGTACAGCGCCAAAAAGGATGAGGTGACGTTACAGGCCGACCCGAAAATCTTCGAGC  
TTTATCAGTTCGACAAAAAGGTACTGCTGCAGCTTCGCGCCATTAACGAGCTGTGCGGTAAGGAGTCTGCCAGGGCGCTCTATACCTTTATTGAAAAGTCTGCC  
CCTAACCCGGCACCCGTCTCGCTGGCACGTCTGCGAGCACGACTGAATCTCACCTCGCGCACCATCACGCAAACTCTACGGTGCGTAAGGCGATGGAGCAG  
CTCAAAGAGATAGGCTATCTCGACTACACCGAAATCAAACGCGGGCGGGTGGTGTACTTTCATATCCACTACAGAAGGCCGAACTGCGCCCGCAAAGTTTG  
CTGGCGCGCTGCCTGCGGGTGAAGAGTTGCCGGCAGATAATGCCGCCGCGGTGGAAGAGCAGGGCGAAATGGTGATGTTGACCAAAGAAGAGCTGGCGCTG  
CTGGAGAAAATACGCAAGGGGCAGATCTGA

>pCP017664 (CP017664)

CTGGACCGTAAACCCGGGAGGTCGTGACGCTGGTACCGAACCGTAATAATACGGTGCAGCCGGTTCGCGCTGATGCGCCTTGGTCTGTTCCGACGCTGA  
AATCCACGGCCCGTGGCCGTAAGGGCCAGATGTCCTCAATGGATGTCACGGAGGAGCTTAAACAGCTCTCGCTGGTAAATCTGAAGGCTACGAGAATATTAA  
AATCACCGGCGCGCTCTGGATATGGACAATGATTTCAAGACCTGGGTCCGGATCATTCATGCCTTCGCCAATAACAATGTTCTCGGAGACAGCGTACGCTGC  
CGTTTGTGGAGTTCGTGAAGCTGTGCGGTATTCCTTCCGCGCGTTCGTCTGCAAAGCTTCGCAAGCGCCTCGACGCCTCGCTCACCCGTATCGCCACTAACACC  
ATCTCGTTCAGTAACAAAGAAGGGGAGTATTACGTGACGCACCTGGTGCAGTCCGCCAATAACAGCGCCAAAAAGGATGAGGTGACGTTACAGGCCGACCCG  
AAAATTTTCGAGCTCTATCAGTTCGACAAAAAAGTACTGCTGCAACTGCGCGCCATTAACGAACTGTGCGGTAAGGAATCAGCGCAGGCGCTCTATACCTTTAT  
CGAAAGCCTGCCGCCAACCCGGCACCAGTCTCGCTGGCACGTCTGCGAGCACGACTGAATCTGACCTCCCGCACCATTACGCAAACTCAACGGTGCGTAA  
GGCGATGGAACAGTTGAAAGAGATTGGCTACCTCGACTACACCGAAATCAAGCGCGGGCGTGTAGTGTACTTCCATATCCACTACAGAAGGCCAAAACTGCG  
CCCGCAAAGTTTGCCTGGCGCGCTGCCTGCGGGTGAAGAGTTGCCGGCAGATAATGCCGCCGCGGTGGAGGAGCAGGGCGAGATGGTGATGCTGACCAAAG  
AAGAGCTGGCATTGCTTGAGAAAATCCGCAAGGGGCAGATCTGA

>pCCO1 (CP012265)

GTGGCTGATGAAGAGAGCATTAAATATTAATGACGCTTTCAGTGAGCTGGATCGCAAAACCCGGCGAGGTTGTCACGCTGGTCCCTAACCGTAATAACACGGTGC

AGCCGGTTGCGCTGATGCGCCTTGGTCTGTTTGTACCGACGCTTAAATCCACGGCCCGTGGGCGTAAAGGGCAGATGTCTTCGATGGATGTGACGGAAGAACT  
GAAGCAACTGTCGCTGGTCAAATCCGAAGGATATGAAAATATCAAAATCACCGGCGCGCGTCTGGATATGGATAACGACTTTAAGACGTGGGTTCGGTATTATTC  
ACGCCTTCGCCAAATATAACGTTCTTGGCGACAGCGTGACGCTCCCTTTTGTGGAGTTTGTAAACTCTGCGGCATCCATCAGCCCGCTCTTCGCCAAACTG  
CGTAAACGCCTTGATGCCTCGCTGACACGCATCGCCACCAATACCATCTCCTTCAGTAATAAAGAAGGTGAGTACTACGTACGCACCTCGTGCAGTCAGCTAA  
ATACAGCGCCAAAAAGGATGAGGTGACGCTACAGGCCGATCCTAAAATCTTTGAGCTCTACCAGTTCGACAAGAAAGTGTGTTGCAGTTGCGCGCCATTAAT  
GAGCTGTGCGGTAAGGAATCGGCGCAGGCGCTCTATACCTTTATAGAAAGCCTGCCGCTAACCCGGCACCGGTCTCGCTTGCCCGTCTGCGGGCCCGTCTGA  
ATCTGACGTACGCACAATTACGCAGAACTCCACGGTGCCTAAGGCGATGGAGCAGCTCAAAGAGATTGGGTATCTCGATTACCCGAAATCAAACGCGGCC  
GCGTGGTCTATTTTCATATCCACTACAGAAGGCCAAAGCTTCGTCCGAGAGTCTTCTGGTGCCTGCCCTCCGGAGAAGATTTGCCCGTTGAAAATACCGTT  
GCTCCTGAAGAGCAGGGTGAGATGGTGTGACCAAGAAGAACTGGCGCTGCTGGAGAAAATCCGCAAAGGCCAGATCTGA

>pPALTyr11Z (CP019707)

ATGGAACATGATAAGGATTTGATCGCAGAATCTTTCAGTGAGCAGGATAAGGCGACCGGTAGTGTAGTGGCGCTGGTGCCGAATTCAAACAATACCGTCCAGC  
CAGTCGCGTTAATGCGACTTGGTCTCTTTGTGCCGACGCTGAAATCAACCGCGCGCGGCAGGACCGGTGAGATGGCGTCCATGGATGTGACCGATGAGCTGAA  
GCAGCTTTCGCTGGTGCCTCTGAGGGGTATGAGAACATTCGTATCACTGGCGCTCGTCTCGATATGGATAACGATTTTAAAACCTGGGTTCGGCATTATCCATGC  
TTTCGCCCGTTATAAGGTAAGTACTGGGCGATACTGTCACTACCGTTTGTGGAGTTTGTAAACTCTGTGGTATTCCTTCCGCCCGTTCTTCTGCCCGGCTGCGTAA  
GCGTCTGGACGCATCCCTGACGCGTATCGGACTAATACCATCTCGTTCACTAACAAGCCGGCGACTACTATGTGACGCACCTTGTGCAGTCAGCTAAGTACA  
GTCCCAGAACGGATGAAGTACTCTACAAGCCGATCCTAAAATATTTGAGCTTTACCAGTTCGACCGCAAAGTGCTGCTGCAACTGCGTGCATTAAACGCTCT  
GTCACGCAAGGAGTCTGCGCAGGCTCTTACACCTTTATTGAGAGCTTACCTTCCAACCCGGCGCCAGTGTGCTGGCCCGGCTGCGTGCCTCGTCTGAACCTG  
ACTTCCCGCACAAATCACGCAAAACGCCACGGTACGCAAAGCAATGGAACAATTGAGAGATATTGGCTATCTCGATTACAGCGAACTGAAGCGAGGGGCGGACT  
GTTTATTTCCATATCCACTATCGGCGGCCAAAGCTGCGGCCCGATCATATAACCACTGAGTTTGGCGCTGAACTTGAAGCAGAGCTGTCTGAAGACGACACTGA  
TACACTGCCTGAGCCGGAGGGGGAAATGGTCCGCCTTTCTCCAGAGGAAAGGTTACTGCTGGAAAAAATCCGTCGTGGCGAGTTCAGGTAA

>pSg66741\_1 (CP054057)

ATGAATGATAAAGGATCCGACATGGAGCAGGATAACGATCTGATTAAGAGTTCATTGAGTACGACGAACAAGAAACGGGTAAGTGTGTTACACTGACACCAA  
ATTCTGGTAACACAGTGCAACCTGTAGCGCTTATGCGGCTTGGTCTTTTTGTGCCGACATTGAAATCCACAGCCCGTGGAAGGACAGGGCTGATGGCCTCTATG  
GATGTGACCAGTGTGAGCTTAGTCAGCTTTCTCTGGTTAAGGCTGAAGGTTATGAAAACATTAATAACTGTTGTTGTTAAACTTTGTGGAATTCCTTCCGCACGA  
TTGGGTGCGAATTATCCATGCTTTTGGCCGCCATAAACTATTGGTGATAGTGTGAGCTTACCTTTTGTGTTGTTAAACTTTGTGGAATTCCTTCCGCACGA  
TCATCAGCAAACTTCGTAAGCGTCTCGATTCTTCCCTGACACGTATTGCGACTAATACCATCTCCTTCTCCAACAAGGCTGGTGATTACTACGTGACACACTTA

GTTCAATCAGCTAAGTATAGTCCTAAGACAGATCAGGTTACGATCCAGGCAGATCCTAAAATTTTCGAGCTTTATCAATTCGATAGAAAGGTCTTGTTGCAACTG  
AGAGCTATCAACGTCTTGTACGGAAAGAATCAGCACAGGCTCTTTATACCTATATTGAAAGCCTGCCCTCCAGCCCTGCGCCAGTGTCTCTTGCTAGACTACG  
AGCGCGCTTAAATTTGACCTCGAGACCCATCACCCAAAATGCTACTGTTTCGTAAAGCTATGGAGCAGCTGCGTGATATTGGTTATCTCGATTATTCAGAGTTAA  
GCGTGGCAGGACAGTCTATTTTCATCATTATGAGCGTCGACCAAAGCTTCATCCTGATGGTCTTCCACTTGGCTTACCGCTTGCTAGTGAAGAAGATATTGAGAT  
TGAGGAGGGTAGTGACTCAGGAGAGGGTGAGCTTGTGCGACTGTCAGCTGAAGAAAAGCAACTTTTGGATCGCATTGCGCCGTGGTGAAGTAAAGTAA

>pEuc2 (CP045722)

ATGCCAAGAAAAGAACCAGATATCCTGAACATAGCCGATGCGTTTAGCGAAACAGACAAACGCACAGGTGAAGTTGTTACTCTTACCCCCAACAGTAACAAC  
ACCGTGCAGCCGGTAGCGCTGATGCGGCTCGGCTTATTTGTTCCGACGCTCAAATCTACGGCGCGCAGTCAGAAAAACCAGATGAATGCCATGGATGTGACAC  
AGGATCTTAAGCAGTTATCCCTGGTCAGGTCAGAAGGCTATGACAACATTAAGATTCTGGGTGCCCGGTTGGATATGGATAATGATTTTAAAACTGGGTTCGGG  
ATCATTGAGCATTGCCACGCATGAGTGTCTGGGAGACACTGTAACGCTCTCTTTTCGTTGAATTCGCAAAACTCTGTGGCATACTTCGGTACGACTCTCCTC  
GAAGCTCAGGAGCCGCCTGGACGCATCCTTGACGCGTATCGCATCGAATACTCTGACCTTTACCAGTAAAGGCGGAGAAAACTACACGACGCATCTGGTGCAG  
TCGGCTAAATACAGCATCAAGAAAGATACAGTAACGCTGCAGGCTGACCCCAAATCTTTGAGTTGTATCAGTTCGACAGAAAGGTTTTGCTGCAGCTGAAAG  
CTATCAATGAGCTGGCCCGCAAAGAATCCGCTCAGGCACTCTACACCTTCATTGAAAGCCTTCCTCCTAAGCCTGCCCGATATCAATGGCGCGTCTGCGTGCC  
AGACTAAACCTGACGTCACGCGTGATTACCCAGAATGCGACTGTCAGAAAGGCCATGGAGCAGTTAAAAGAGATTGGTTATCTTGATTACACCGAAACACGGC  
GGGGCTCGTCAGTCTACTTTTGGGTGCATTATCGTCATCCTAAGCTGCGTCCGGCCGAAGTCCACTCAGCAACTCTGACCTGATCGATGATGAGATCGACGAT  
TATGACGATCTTGATCTTGACCCCGCGTATTGATGTCAGCCTGCCTGAACCGATGATCGAAGAAGAGAACAGTGAAGTGGTCATGGTGTCTCGTGAGGAAA  
AAGAATTACTCAACAAAATCAGAAAGCAGAAGAAGCTGTGA

>pPant3 (CP022519)

ATGCCAAGAAAAGAACCAGATATCCTGAACATAGCCGATGCGTTTAGCGAAACAGACAAACGCACAGGTGAAGTTGTTACTCTTACCCCCAACAGTAACAAC  
ACCGTGCAGCCGGTAGCGCTGATGCGGCTCGGCTTATTTGTTCCGACGCTCAAATCTACGGCGCGCAGTCAGAAAAACCAGATGAATGCCATGGATGTGACAC  
AGGATCTTAAGCAGTTATCCCTGGTCAGGTCAGAAGGCTATGACAACATTAAGATTCTGGGTGCCCGGTTGGATATGGATAATGATTTTAAAACTGGGTTCGGG  
ATCATTGAGCATTGCCACGCATGAGTGTCTGGGAGACACTGTAACGCTCTCTTTTCGTTGAATTCGCAAAACTCTGTGGCATACTTCGGTACGACTCTCCTC  
GAAGCTCAGGAGCCGCCTGGACGCATCCTTGACGCGTATCGCATCGAATACTCTGACCTTTACCAGTAAAGGCGGAGAAAACTACACGACGCATCTGGTGCAG  
TCGGCTAAATACAGCATCAAGAAAGATACGTAACGCTGCAGGCTGACCCCAAATCTTTGAGTTGTATCAGTTCGACAGAAAGGTTTTGCTGCAGCTGAAAG  
CTATCAATGAGCTGGCCCGCAAAGAATCCGCTCAGGCACTCTACACCTTCATTGAAAGCCTTCCTCCTAAGCCTGCCCGATATCAATGGCGCGTCTGCGTGCC  
AGACTAAACCTGACGTCACGCGTGATTACCCAGAATGCGACTGTCAGAAAGGCCATGGAGCAGTTAAAAGAGATTGGTTATCTTGATTACACCGAAACACGGC

GGGGCTCGTCAGTCTACTTTTGGGTGCATTATCGTCATCCTAAGCTGCGTCCGGCCGAACTGCCACTCAGCAACTCTGACCTGATCGATGATGAGATCGACGAT  
TATGACGATCTTGATCTTGACCCCGGCGTTATTGATGTCAGCCTGCCTGAACCGATGATCGAAGAAGAGAACAGTGAAGTGGTTCATGGTGTCTCGTGAGGAAA  
AAGAATTACTCAACAAAATCAGAAAGCAGAAGAAGCTGTGA

>pCP061085 (CP061085)

ATGCCAAGAAAAGAACCAGATATCCTGAACATAGCCGATGCGTTTACGCGAAACAGACAAACGCACAGGTGAAGTTGTTACTCTTACCCCCAACAGTAACAAC  
ACCGTGCAGCCGGTAGCGCTGATGCGGCTCGGCTTATTTGTTCCGACGCTCAAATCTACGGCGCGCAGTCAGAAAAACCAGATGAATGCCATGGATGTGACAC  
AGGATCTTAAGCAGTTATCCCTGGTCAGGTCAGAAGGCTATGACAACATTAAGATTCTGGGTGCCCGGTTGGATATGGATAATGATTTTAAACCTGGGTCCGG  
ATCATTGAGCATTGCCACGCATGAGTGTCTGGGAGATACTGTAACGCTCTCTTCGTTGAATTCGAAAACCTCTGTGGCATACTTCGGTACGACTCTCCTCG  
AAGCTCAGGAGCCGCTGGACGCATCCTTGACGCGTATCGCATCGAATACTCTGACCTTTACCAGTAAAGGCGGAGAAAACCTACACGACGCATCTGGTGCAGT  
CGGCTAAATACAGCATCAAGAAAGATACGGTAACGCTGCAGGCTGACCCCAAATCTTTGAGTTGTATCAGTTCGACAGAAAGGTTTTGCTGCAGCTGAAAGC  
TATCAATGAGCTGGCCCGCAAAGAATCCGCTCAGGCACTCTACACCTCATTGAAAGCCTTCTCCTAAGCCTGCCCGATATCAATGGCGCGTCTGCGTGCCA  
GACTAAACCTGACGTCACGCGTGATTACCCAGAATGCGACTGTCAGAAAGGCCATGGAGCAGTTAAAAGAGATTGGTTATCTTGATTACCCGAAACACGGCG  
GGGCTCGTCAGTCTACTTTTGGGTGCATTATCGTCATCCTAAGCTGCGTCCGGCCGAACTGCCACTCAGCAACTCTGACCTGATCGATGATGAGATCGACGATT  
ATGACGATCTTGATCTTGACCCCGGCGTTATTGATGTCAGCCTGCCTGAACCGATGATCGAAGAGGAGAACAGTGAAGTGGTTCATGGTGTCTCGTGAGGAAA  
AGAATTACTCAACAAAATCAGAAAGCAGAAGAAGCTGTGA

>pCP048036 (CP048036)

ATGCCAAGAAAAGAACCAGATATCCTGAACATAGCTGATGCGTTTACGCGAAACAGATAAACGTACAGGTGAAGTTGTTACTCTTACCCCCAACAGTAACAATA  
CCGTCCAGCCGGTAGCATTGATGCGACTCGGTTTATTTGTTCCGACGTTAAAATCCACAGCACGCAGTCAGAAAAACCAGATGAACGCCATGGATGTGACCCA  
GGATCTTAAACAGTTATCCCTGGTCAGGTCAGAAGGCTATGACAACATCAAGATTCTGGGTGCCCGCCTGGATATGGATAATGATTTCAAACCTGGGTCCGGGA  
TCATTGCTGCTTTCGCTACGCATGAGTGTCTGGGAGACACGGTAACGCTCTCATTGCTTGAATTTGCCAAAACCTATGCGGCATACCCTCAGTGCAGGCTCTCCTCG  
AAGCTCAGAAGCCGCTGGACGCTTCGCTGACCCGATTGCCTCTAACACCCTGACTTTTACCAGTAAGGGCGGAGAGAACCTACACGACGCATCTGGTGCAGT  
CTGCGAAATACAGCATCAAGAAGGACACGGTGACGCTGCAGGCCGATCCCAAGATCTTTGAGCTGTATCAGTTCGACAGAAAGGTTCTGCTGCAGCTTAAAG  
CCATCAATGAGCTGGCACGCAAAGAGTCTGCTCAGGCGCTCTACACCTCATTGAAAGCCTTCCGCCAAAGCCTGCGCCGATATCTATGGCGCGCTTGCAGCGC  
CAGACTTAATCTGACCTCGCGCGTGATAACGCAGAATGCCACCGTCAGAAAGGCCATGGAGCAGTTGAAAGAGATCGGTTATCTCGACTACCCGAAACCCG  
ACGTGGTTTCATCAGTCTACTTCTGGGTTTATTACCGTCATCCTAAGCTGCGTCCGGCCGAACTGCCGCTCAGTAAAGTCAGGCCTGATCGATGATGAGATGGATG  
AGTTTGACGATCTTGATATCGATTCCGACGTAATTGACGTCACCCTGCCTGAACCGGTGATTGAAGAGGATAGCAGTGAGCTGGTGTGGTCTCGCGTGAGGA

AAAAGAGCTACTGAATAAAATCAGGAAGCAGAAGAAGCAGTGA

>pCP016892 (CP016892)

ATGCCAAGAAAAGAACCAGATATCCTGAACATAGCTGATGCGTTTATGTAACAGATAAACGTACAGGTGAAGTTGTTACTCTTACCCCCAACAGTAACAACA  
CCGTCCAGCCGGTAGCATTGATGCGACTCGGTTTATTTGTTCCGACGTTAAAATCCACAGCAGCAGTCAGAAAAACCAGATGAACGCCATGGATGTGACCCA  
GGATCTTAAACAGTTATCCCTGGTCAGGTCAGAAGGCTATGACAACATCAAGATTCTGGGTGCCCGCTGGATATGGATAATGATTTCAAAACCTGGGTCGGGA  
TCATTTCGTGCTTTCGCTACGCATGAGTGTCTGGGAGACACGGTAACGCTCTCATTTCGTTGAATTTGCCAAACTATGCGGCATACCCTCAGTGC GGCTCTCCTCG  
AAGTCAGAAGCCGCTGGACGCTTCGCTGACCCGATTGCCTCTAACACCCTGACTTTTACCAGTAAGGGCGGAGAGAACTACACGACGCATCTGGTGCAGT  
CTGCGAAATACAGCATCAAGAAGGACACGGTAACGCTGCAGGCCGATCCCAAGATCTTTGAGCTGTATCAGTTCGACAGAAAGGTTCTGCTGCAGCTTAAAG  
CCATAAATGAGCTGGCAGCAAAGAGTCTGCTCAGGCGCTCTACACCTTCATTGAAAGCCTTCGCGCAAAGCCTGCGCCGATATCTATGGCGCGCCTGCGCGC  
CAGACTTAATCTGACCTCGCGCGTGATAACGCAGAATGCCACCGTCAGAAAGGCCATGGAGCAGTTGAAAGAGATCGGTTATCTCGACTATAACCGAAACCCGA  
CGTGGTTCATCAGTCTACTTCTGGGTTTCATTACCGTCATCCTAAGCTGCGTCCGGCCGAAGTCCGCTCAGTAAGTCAGGCCTGATCGATGATGAGATGGATGA  
GTTTGACGATCTTGATATCGATTCCGACGTAATTGACGTCACCCTGCCTGAACCGGTGATTGAAGAGGATAGCAGTGAGCTGGTGATGGTCTCGCGTGAGGAA  
AAAGAGCTGCTGAACAAAATCAGGAAGCAGAAGAAGCAATGA

>pPagL15\_2 (CP034150)

ATGCCAAGAAAAGAACCAGATATCCTGAACATAGCTGATGCGTTTATGCGAAAACAGATAAACGTACAGGTGAAGTTGTTACTCTTACCCCCAACAGTAACAACA  
CCGTCCAGCCGGTAGCATTGATGCGACTCGGTTTATTTGTTCCGACGTTAAAATCCACAGCAGCAGTCAGAAAAACCAGATGAACGCCATGGATGTGACCCA  
GGATCTTAAACAGTTATCCCTGGTCAGGTCAGAAGGCTATGACAACATTAAGATTCTGGGTGCCCGCTGGATATGGATAATGATTTCAAAACCTGGGTCGGGA  
TCATTTCGTGCAATTCGCTACGCATGAGTGTCTGGGAGACACGGTAACGCTCTCTTTTCGTTGAATTTGCCAAACTATGCGGCATACCCTCAGTGCCTCTCTCCTCGA  
AGCTCAGGAGCCGTCTGGATGCTTCGCTGACGCGTATTGCCTCTAACACCCTGACTTTTACCAGCAAGGGCGGAGAGAACTACACGACGCACCTGGTGCAGT  
CTGCGAAATACAGCATCAAGAAGGACACGGTAACGCTGCAGGCCGATCCCAAGATCTTTGAGCTGTATCAGTTCGACAGAAAGGTTCTGCTGCAGCTTAAAG  
CCATCAATGAGCTGGCAGCAAAGAGTCTGCTCAGGCGCTCTACACCTTCATTGAAAGCCTTCGCGCGAAGCCTGCGCCGATATCTATGGCGCGTCTGCGCGC  
AAGACTTAACCTGACATCGCGTGTGATTACCCAGAATGCCACCGTCAGAAAGGCCATGGAGCAGTTAAAAGAGATCGGCTATCTCGACTACACCGAAACCCGA  
CGTGGTTCATCAGTCTACTTCTGGGTTTCATTATCGTCATCCTAAGCTGCGCCCGGCCGAAGTCCGCTCAGTAAGTCAGGCCTGATCGATGATGAGATGGATGA  
GTTTGACGATCTTGATATCGATTCCGACGTAATTGACGTCAGCCTGCCTGAACCGGTGATTGAAGAGGATAGCAGTGAGCTGGTGATGGTCTCGCGTGAAGAA  
AAAGAGCTACTGAACAAAATCAGGAAGCAGAAGAAGCAATGA

>pPV989-167 (CP028351)

ATGCCAAGAAAAGAACCAGATATCCTGAACATAGCTGATGCGTTTAGCGAAACAGACAAGCGTACAGGCGAAGTTGTTACTCTAACGCCAACAGTAATAACA  
CCGTGCAGCCAGTCGCGTTGATGCGTCTCGGCTTGTTTGTTCACAGCTGAAATCCACAGCGCGCAGTCAGAAAAACCAGATGAATGCGATGGATGTGACTCA  
GGATCTGAAACAGTTATCTCTGGTCAGATCGGAAGGGTATGACAACATCAAGATTCTGGGTGCCCGGCTGGATATGGATAATGATTTAAGACCTGGGTTGGGA  
TCATTGCGCATTCGCCACGCATGAGTGTCTGGGAGACACGGTAACGCTCTCGTTCGTAGAATTTGCAAACTCTGCGGCATACCTTCTGCGCGCCTCTCATCG  
AAGCTCAGGAGCCGTCTGGACGCTTCGCTGACGCGGATTGCGTCTAATACCCTGACTTTTACCAGCAAGGGCGGAGAGAACTACACAACGCATCTGGTGCAG  
TCCGCCAAATACAGCGTCAAAAAGGACACGGTGACCTTACAGGCCGATCCCAAAATCTTTGAGCTATATCAGTTCGACAGAAAGGTTCTGCTGCAGCTTAAGG  
CTATTAACGAGCTGGCACGCAAAGAATCCGCTCAGGCGCTTTATACGTTTATTGAAAGCCTTCCGCTAAACCTGCACCAATATCCATGGCACGCCTGCGTGCA  
AGGCTTAACCTTACGTCGCGCGTGATCACCCAGAATGCGACAGTCAGGAAAGCGATGGAGCAGTTAAAAGAGATTGGTTATCTCGATTATACCGAGACCCGCC  
GCGGCTCTTCCGTGTACTTCTGGGTCCATTATCGTCACCCCAACTGCGCCCGGCCGAACTGCCGCTCAGCAAGGCAGACCTGATCGATGATGAGATGGACGA  
GTTTGACGATATGGACAACGATCTCACTATTATTGATGTCAATCTGCCTGAACCGGTGGGTGAAGATGAAAGCAGTGAACCTTGTCATGGTATCGCGTGAGGAAA  
AAGAGTTACTGAATAAAATCAGGAAACAGAAAAAGCGTTAG

>pPag1 (CP001893)

ATGCCAAGAAAAGAACCAGATATCCTGAACATAGCTGATGCGTTTAGCGAAACAGACAAGCGTACAGGCGAAGTTGTTACTCTAACGCCAACAGTAATAACA  
CCGTGCAGCCAGTCGCGTTGATGCGTCTCGGCTTGTTTGTTCACAGCTGAAATCCACAGCGCGCAGTCAGAAAAACCAGATGAATGCGATGGATGTGACTCA  
GGATCTGAAACAGTTATCTCTGGTCAGATCGGAAGGGTATGACAACATCAAGATTCTGGGTGCCCGGCTGGATATGGATAATGATTTAAGACCTGGGTTGGGA  
TCATTGCGCATTCGCCACGCATGAGTGTCTGGGAGACACGGTAACGCTCTCGTTCGTAGAATTTGCAAACTCTGCGGCATACCTTCTGCGCGCCTCTCATCG  
AAGCTCAGGAGCCGTCTGGACGCTTCGCTGACGCGGATTGCGTCTAATACCCTGACTTTTACCAGCAAGGGCGGAGAGAACTACACAACGCATCTGGTGCAG  
TCCGCCAAATACAGCGTCAAAAAGGACACGGTGACCTTACAGGCCGATCCCAAAATCTTTGAGCTATATCAGTTCGACAGAAAGGTTCTGCTGCAGCTTAAGG  
CTATTAACGAGCTGGCACGCAAAGAGTCCGCTCAAGCGCTTTATACGTTTATTGAAAGCCTTCCGCTAAACCTGCACCAATATCCATGGCACGCCTGCGTGCA  
AGGCTTAACCTTACGTCGCGCGTGATCACCCAGAATGCGACAGTCAGGAAAGCGATGGAGCAGTTAAAAGAGATTGGTTATCTCGATTATACCGAGACCCGCC  
GCGGCTCTTCCGTGTACTTCTGGGTCCATTATCGTCACCCCAACTGCGCCCGGCCGAACTGCCGCTCAGCAAGGCAGACCTGATCGATGATGAGATGGACGA  
GTTTGACGATATGGACAACGATCTCACTATTATTGATGTCAATCTGCCTGAACCGGTGGGTGAAGATGAAAGCAGTGAACCTTGTCATGGTATCGCGTGAGGAAA  
AAGAGTTACTGAATAAAATCAGGAAACAGAAAAAGCGTTAG

>pVag2 (CP038855)

ATGCCAAGAAAAGAACCAGATATCCTGAACATAGCTGATGCGTTTAGCGAAACAGACAAGCGTACAGGCGAAGTTGTTACTCTGACGCCAACAGTAATAATA  
CCGTGCAGCCAGTCGCGTTGATGCGACTTGCTTGTTTGTTCACAGCTGAAATCCACAGCGCGTAGTCAGAAAAACCAGATGAATGCGATGGATGTGACTCA

GGATCTGAAACAGTTATCCCTGGTCAGATCGGAAGGGTATGACAACATCAAGATTCTGGGTGCCCGGCTGGATATGGATAATGATTTTAAGACCTGGGTCTGGGA  
TCATTTCGCGCATTTCGCCACGCATGAGTGTCTGGGAGACACGGTAACGCTCTCATTTCGTAGAATTTGCAAACTCTGCGGCATACCTTCTGCGCGCCTCTCATCG  
AAGCTCAGGAGCCGTCTGGACGCTTCGCTGACGCGGATTGCGTCTAATACCCTGACTTTTACCAGCAAGGGCGGAGAGAAGTACACAACGCATCTGGTGCAG  
TCCGCCAAATACAGCGTCAAAAAGGATACGGTGACCTTACAGGCCGATCCCAAGATCTTTGAGCTGTATCAGTTCGACAGAAAAGTTCTGCTGCAGCTTAAGG  
CTATTAACGAGCTGGCACGCAAAGAGTCCGCTCAGGCGCTTTATACGTTTCATTGAAAGCCTTCCGCCTAAACCTGCACCGATATCTATGGCACGCCTGCGTGCA  
AGGCTTAATCTTACGTCGCGCGTGATCACCCAGAATGCGACAGTCAGAAAGGCGATGGAGCAGTTAAAAGAGATTGGTTATCTCGACTACACCGAGACCCGAC  
GCGGCTCTTCCGTGTACTTCTGGGTCCATTATCGTCAACCCAAAGCTGCGCCAGCCGAACGCCGCTCAGCAAGGCAGGCCTGATCGATGATGAGATGGACGA  
GTTTGACGATCTGGACAACGATCCCCTATTATTGATGTCAATCTGTCCGAATCGGTGAGTGAGGATGAAAGCAGTGAACCTTGTTCATGGTATCGCGTGAGGAAA  
AAGAATTACTTAATAAAATCAGGAAACAGAAAAAGCGTTAG

>pHS1 (CP006570)

ATGCCGAAAAAAGAACAAGAAAACAAAATGATAGCTGAAGCTTTTAGCGAGACGGATAAACGGACCGGCGAGGTTATTAACCTAACGCCAAACAGTAACAAC  
ACGGTCCAGCCTGTCGCGTTGATGAGGCTTGGACTCTTTGTGCCAACACTGAAGTCCACCAGCCGCGGTTCGCAAAAACCAAATGTCTACCATGGACGTGACC  
GATGAATTAACAGCTTTCACTCGTCAAATCAGAAGGTTATGAAAACATCAAATTACCGGCGCCCGGCTGGATATGGACAACGATTTTAAACATGGGTTCG  
GTATCATACATGCCTTTGCAAAGTACAAGGTGCTGGGTGACAGCGTAACACTCCCTTTTGTGGATTTTGCCAAGCTATGCGGTATCCCCTCTGTACGTTCCCTCTG  
CTAAGCTCAGAAGCCGTCTGGATGCATCCCTCACGCGTATCGCGACTAACACGATCGCTTTTAGCAATAGGGAAGGGGAGTACTATGTCACTCACCTGGTGCAA  
TCAGCAAATACAGCACGAAAAACGACTCGGTGACCCTTCAAGCGGATCCCAAAATTTTCGAGTTATATCAATTTGATAAAAAGGTGTTATTGCAGCTTAGGGC  
TATCAATGAACTGTCTCGGAAAAGTCTGCACAAGCGCTCTATACCTTTATTGAAAGCCTTCCCTACCGATCCCCTCCGATATCAATGGGGCGCCTGCGAGCCC  
GATTAACCTGACTTCGCGCACAATCACTCAGAACGCCACGGTAAGAAAAGCCATGGAGCAACTGAAAGAGATTGGCTACTTGGATTACACGGAGATAAAAC  
GGGGGCAAACCGTTTACTTTGTTATTCATCTATCGACGCCCCGAAACTCAGACCTGCAGATATCCCTCTGAGCCTGCCTGATATCACCGATGAAGACTTAGAAAAC  
ATGAAAGAGCCCGCGGATCAAGGCGGTGAAATGGTGTGCTGTCCAAGGAAGAGATGGAATTACTTGAGAAAATCCGCAAGAGCAAAAAAAGACCTAA

>pHCM2 (AL513384)

ATGAGCGAAAACGGCAATAAAAACATAGCGATCGTTGAAGCATTCTCAGAAACAGACAAAAAGACCGGTGAAGTTGTTACGTTAGTTCCTAACACCAACAAC  
ACAGTTCAGCCTGTTGCTCTGATGCGTCTTGGTCTCTTCGTTCCGACGCTGAAATCGACCGCCAGGGGCAGAAAGGGGCAAATGGTCTCTATGGACGCCTCTG  
CTGAACTCAAACAGCTGTCTCTGGCCAAAGCCGAAGGGTACGAGGACATAAGGATCTCCGGCGTTCGTCTGGATATGGATAACGACTTCAAACGTGGGTAG  
GCATCATCCACGCGTTCGCCAAGCACAAGGTTGTTGGCGACACCGTACGTTACCGTTTCGTCGAGTTCGTCAGGCTCTGTGGCATAACACGGCCAGATCGTC  
CGCGAAGTTACGCAAGCGCCTGGACAGTTCTCTAACTCGTATTGCCACAAACACTATCTCATTCCGCAGTAAAGGCTCTGATGAGTATTACGTGACGCACCTTG



TGCAGACAGCAAAGTACAGCACAAAGAACGACACGGTCTCGCTGCAGGCTGATCCTAAGATTTTCGAACTCTACCAGTTCGACAAAAAGGTTCTTCTGCAAC  
TCCGGGCAATTAACGAACTCTCCAGAAAAGAATCCGCGCAGGCGCTCTACACCTTCATCGAAAGTTTGCCACCTGACCCGGCACCAATCTCGCTGGCTCGCTT  
ACGCGCCAGACTTAACTTAACCAGCCGCACCATTACCCAGAACGCGACAGTCAGGAAGGCGATGGAGCAGTTGCGTGAGATCGGCTATCTCGATTACACCGA  
AGTGAAGCGCGGCAGCTCGGTCTACTTCATCATCCACTATAGGCGGCCGAAATTACGCCCAGCACTGCCACCAACTAAAGCTGCGCCTGAAGAACCAGAAGA  
CATCTTGCCTGGTGATGATCAGGAGGACATTATCGATGTTGTTCTGAAGAAAAAGAGGGTGAGATGGTCATGTTGAGCAAGGAAGAACTGGCGATTCTCGAA  
GAGCTACGCAAGGCAAAAAGCTCGCAAATAA

>pG6809-1 (KT345945)

ATGAGCGAAAACGGCAATAAAAACATAGCGATCGTTGAAGCATTCTCAGAAACAGACAAAAAGACCGGCGAAGTTGTTACGTTAGTTCCTAACACCAACAAC  
ACAGTTCAGCCTGTTGCTCTGATGCGTCTTGGTCTCTTCGTTCCGACGCTGAAATCGACCGCCAGGGGCAGAAAGGGGCAAATGGTCTCTATGGACGCCTCTG  
CTGAACTCAAACAGCTGTCTCTGGCCAAAGCCGAAGGGTACGAGGACATAAGGATCTCCGGCGTTCGTCTGGATATGGATAACGACTTCAAACCGTGGGTAG  
GCATCATCCACGCGTTCGCCAAGCACAAGGTTGTTGGCGACACTGTCACGTTACCGTTCGTCGAGTTCGTCAGGCTCTGTGGCATAACCAACGGCCAGATCGTC  
CGCGAAGTTACGTAAGCGCCTGGACAGTTCTCTGACTCGTATTGCCACAAACACTATCTCATTTTCGAGTAAAGGCTCTGATGAGTATTACGTGACGCACCTTG  
TGCAGACAGCAAAGTACAGCACAAAGAACGACACGGTCTCGCTGCAGGCTGATCCTAAGATTTTCGAACTCTATCAGTTCGACAAAAAGGTTCTTCTGCAAC  
TCCGGGCAATCAACGAACTCTCCAGAAAAGAATCCGCGCAGGCGCTCTACACCTTCATCGAAAGTTTGCCACCTGACCCGGCACCAATCTCGTTAGCTCGCTT  
ACGCGCCAGACTTAACTTAACCAGCCGCACCATTACCCAGAATGCGACAGTCAGGAAGGCGATGGAGCAGCTGCGGGAGATCGGCTATCTCGATTACACCGA  
AGTGAAGCGCGGCAGCTCGGTCTACTTCATCATCCACTATAGGCGGCCGAAGTTACGCCCGCATTGCCACCAGTTAAAGCTGCGCCGGAAGAACCAGAAGAT  
ATCTTGCCCTGGTGATGATTCGGAGGACATTATCGATGTTGTTCTGAAGAAAAAGACGGTGAGATGGTCATGTTAAGCAAGGAAGAACTGGCGATTCTCGAAG  
AGCTGCGCAAAGCTAAAACCTCGTAAATAG

>pG8786 (AJ698720)

ATGAGCGAAAACGGCAATAAAAACATAGCGATCGTTGAAGCATTCTCAGAAACAGACAAAAAGACAGGCGAAGTTGTTACGTTAGTTCCTAACACCAACAAC  
ACTGTTACAGCCGTTGCTCTGATGCGTCTTGGTCTCTTCGTTCCGACGCTGAAATCGACGTCAGGGGCAGGAAGGGGCAAATGGTCTCTATGGACGCCTCTG  
CTGAACTCAAACAGCTGTCTCTGGCCAAAGCCGAAGGGTATGAGGACATAAGGATCTCCGGCGTTCGTCTGGATATGGATAACGACTTTAAAACGTGGGTAGG  
CATCATCCACGCGTTCGCCAAGCACAAGGTTGTTGGCGACACTGTCACGTTACCGTTCGTCGAGTTCGTCAGGCTCTGTGGCATAACCAACGGCCAGATCGTCC  
GCGAAGTTACGTAAGCGCCTGGACAGTTCTCTAACTCGTATCGCCACAAACACTATCTCATTCGCGAGTAAAGGCTCTGATGAGTATTACGTAACCTCACCTTGT  
GCAGACAGCAAAGTACAGCACTAAGAACGACACGGTCTCGCTGCAGGCTGATCCTAAGATTTTCGAACTCTACCAGTTCGACAAAAAGGTTCTTCTGCAACT  
CCGGGCAATCAACGAACTCTCCAGAAAAGAATCCGCCAGGCACTCTACACATTTCATCGAAAGTTTGCCACCTGACCCGGCACCAATCTCGTTGGCTCGCTTA

CGCGCCAGACTTAACTTAACCAGCCGCACCATTACCCAGAACGCGACTGTCAGGAAGGCGATGGAGCAGCTGCGGGAGATCGGCTATCTCGATTACACCGAA  
GTGAAGCGCGGCAGCTCGGTCTACTTCATCATCCACTATAGGCGGGCCGAAGTTACGCCCGGCATTGCCACCAACTAAAGCTGCGCCGGAAGAACCAGAAGAG  
CAGGAAGATAACTTGCCTGGCGATGGTCAGGAGGACATCATCGATGTTGTTCTGAAGAAAAAGACGGTGAGATGGTCATGTTGAGCAAGGAAGAACTGGCG  
ATTCTCGAAGAGCTGCGCAAGGCAAAGGCTCGCAAATAG

>pCP53-113k (CP033097)

ATGAGCGTAAACGACAATAAAAAACATTGCGATAAGCGAAGCATTTCGAAACAGACAAAAAGACCGGCGAAGTTGTTACGTTAGTTCCTAACACCAACAAC  
ACAGTTCAGCCTGTTGCTCTGATGCGTCTTGGTCTCTTCGTTCCGACGCTGAAATCGACATCCAGGGGTAGAAAGGGGCAAATGGTCTCTATGGACGCCTCCG  
CTGAACTCAAACAGCTGTCTCTGGCCAAAGCCGAAGGGTACGAGGATATAAGGATTGCTGGTCTTCGTTGATATGGATAACGATTTCAAACATGGGTGGG  
CATCATCCACGCGTTCGCCAAGCACAAGGTTGTTGGTGACACCGTCACGTTGCCGTTTCGTCGAGTTCGTCAGACTTTGTGGCATAACCAACAGCCAGATCGTCC  
GCGAAGTTACGTAAGCGCCTGGACAGCTCTCTAAGTCGTATCGCCACAAACACCATCTCATTCCGCAGCAAAGGCTCTGAAGAGTATTACGTTACGCACCTTGT  
GCAGACGGCAAAGTACAGTACCAAGAATGACACGGTCGAACTGAAGGCCGATCCTAAGATTTTCGAACTTTACCAGTTCGACAAAAAGGTGCTTTTGCAACT  
TCGGGCCATCAACGAACTCTCCAGAAAAGGAATCCGCGCAGGCGCTCTACACCTTCATTGAAAGTTTGCACCAGACCCGGCGCCAATCTCATTGGCTCGTTA  
CGCGCCAGACTTAACTTAACCAGCCGTACCATTACCCAGAATGCGACAGTCAGGAAGGCGATGGAGCAACTGCGAGAGATCGGCTATCTCGATTACACTGAAG  
TGAAACGCGGCAGCTCGGTCTACTTCGTCATCCACTATAGACGGCCGAAGTTACGTTTCGGCACTGCCGCCATCTATGGCCACGCCTGAAGATCCAGAAGATATC  
TTGTCAGGTGATGATCCGGAGGACATTATCGATGTTGCTCCTGAAGAAAAAGACGGGGAAATGGTCATGTTGAGCAAGGAAGAACTGGCGATTCTCGAAGAG  
CTGCGCAAGGCAAAGGCTCGCAAATAG

>pP59A-2 (CP044300)

ATGAGCGTAAACGACAATAAAAAACATTGCGATAAGCGAAGCATTTCGAAACAGACAAAAAGACCGGCGAAGTTGTTACGTTAGTTCCTAACACCAACAAC  
ACAGTTCAGCCTGTTGCTCTGATGCGTCTTGGTCTCTTCGTTCCGACGCTGAAATCGACATCCAGGGGTAGAAAGGGGCAAATGGTCTCTATGGACGCCTCCG  
CTGAACTCAAACAGCTGTCTCTGGCCAAAGCCGAAGGGTACGAGGATATAAGGATTGCTGGTCTTCGTTGATATGGATAACGATTTCAAACATGGGTGGG  
CATCATCCACGCGTTCGCCAAGCACAAGGTTGTTGGTGACACCGTCACGTTGCCGTTTCGTCGAGTTCGTCAGACTTTGTGGCATAACCAACAGCCAGATCGTCC  
GCGAAGTTACGTAAGCGCCTGGACAGCTCTCTAAGTCGTATCGCCACAAACACCATCTCATTCCGCAGCAAAGGCTCTGAAGAGTATTACGTTACGCACCTTGT  
GCAGACGGCAAAGTACAGTACCAAGAATGACACGGTCGAACTGAAGGCCGATCCTAAGATTTTCGAACTTTACCAGTTCGACAAAAAGGTGCTTTTGCAACT  
TCGGGCCATCAACGAACTCTCCAGAAAAGAATCCGCGCAGGCGCTCTACACCTTCATTGAAAGTTTGCACCAGACCCGGCGCCAATCTCATTGGCTCGTTA  
CGCGCCAGACTTAACTTAACCAGCCGCACCATTACCCAGAATGCGACAGTCAGGAAGGCGATGGAGCAACTGCGAGAGATCGGCTATCTCGATTACACTGAA  
GTGAAACGCGGCAGCTCGGTCTACTTCGTCATCCACTATAGACGGCCGAAGTTACGTTTCGGCACTGCCGCCATCTATGGCCACGCCTGAAGATCCAGAAGATAT

CTTGCCAGGTGATGATCCGGAGGACATTATCGATGTTGCTCCTGAAGAAAAAGACGGGGAAATGGTCATGTTGAGCAAGGAAGAACTGGCGATTCTCGAAGA  
GCTGCGCAAGGCAAAGGCTCGCAAATAG

>pTB212 (CP033252)

ATGAGCGTAAACGACAATAAAAAACATTGCGATAAGCGAAGCATTTTCCGAAACAGACAAAAAGACCGGCGAAGTTGTTACGTTAGTTCCTAACACCAACAAC  
ACAGTTCAGCCTGTTGCTCTGATGCGTCTTGGTCTCTTCGTTCCGACGCTGAAATCGACATCCAGGGGTAGAAAGGGGCAAATGGTCTCTATGGACGCCTCCG  
CTGAACTCAAACAGCTGTCTCTGGCCAAAGCCGAAGGGTACGAGGATATAAGGATTGCTGGTCTTCGTCTTGATATGGATAACGATTTCAAACATGGGTGGG  
CATCATCCACGCGTTCGCCAAGCACAAGGTTGTTGGTGACACCGTCACGTTGCCGTTTCGTTCGAGTTCGTTCAGACTTTGTGGCATTCCAACAGCCAGATCGTCC  
GCGAAGTTACGTAAGCGCCTGGACAGCTCTCTAAGTCGTATCGCCACAAACACCATCTCATTCCGCAGCAAAGGCTCTGAAGAGTATTACGTTACGCACCTTGT  
GCAGACGGCAAAGTACAGTACCAAGAATGACACGGTCGAACTGAAGGCCGATCCTAAGATTTTCGAACTTTACCAGTTCGACAAAAAGGTGCTTTTTGCAACT  
TCGGGCCATCAACGAACTCTCCAGAAAAGAATCCGCGCAGGCGCTCTACACCTTATTGAAAGTTTGCCACCAGACCCGGCGCCAATCTCATTGGCTCGCTTA  
CGCGCCAGACTTAACTTAACCAGCCGCACCATTACCCAGAATGCGACAGTCAGGAAGGCGATGGAGCAGCTGCGAGAGATCGGCTATCTCGATTACACTGAA  
GTGAAACGCGGCAGCTCGGTCTACTTCGTTCATCCACTATAGACGGCCGAAGTTACGTTTCGGCACTGCCGCCATCTATGGCCACGCCTGAAGATCCAGAAGATAT  
CTTGCCAGATGATGATCCGGAGGACATTATCGATGTTGCTCCTGAAGAAAAAGACGGGGAAATGGTCATGTTGAGCAAGGAAGAACTGGCGATTCTCGAAGA  
GCTGCGCAAGGCAAAGGCTCGCAAATAG

>pLF82 (CU638872)

ATGAGCGAAAACGGCAATAAAAAACATAGCGATCGTTGAAGCATTTTCAGAAACAGATAAAAAGACAGGCGAAGTTGTTACGTTGGTTCCTAACACTAATAACA  
CTGTTTCAGCCTGTTGCTTTGATGCGTCTGGGCCTCTTCGTTCCGACGCTGAAATCGACATCCAGAGGAAGAAAGGGGCAAATGGTCTCTATGGATGCCTCTGCT  
GAACTCAAACAGCTGTCTCTGGCAAAAAGCCGAAGGGTACGAAGACATAAGGATCTCTGGCCTTCGGCTTGATATGGATAACGACTTTAAAACGTGGGTGGGAA  
TAATCCACGCGTTTGCCAAACACAAGGTCGTTGGCGATACTGTCACGTTGCCGTTTCGTTGAGTTTGTAAAGGCTGTGTGGCATTCCGACCGCCAGGTCATCAGC  
GAAGTTACGCAAACGCCTGGACAGTTCGCTAAGCCGTATTGCCACAAATACCATCTCGTTCCGTAGCAAAGGCTCTGATGAGTTTTACGTAACGCATCTTGTGC  
AAACGGCAAATATAGTGTCAAGCACGATACGGTCGAACTGAAAGCAGATCCCAAGATTTTCGAACTCTACCAGTTCGACAAAAAGGTTCTTCTGCAACTCCG  
GGCTATAAACGAACTCTCAAGAAAAGAATCCGCTCAGGCGCTTTATACTTTTATTGAAAGTTTGCCGCTGATCCGGCACCAATATCACTAGCCCGTTTACGCG  
CCAGACTTAATCTGACAAGTCGCACTATTACTCAGAATGCGACGGTAAGAAAGGCTATGGAACAGCTGCGAGAGATAGGATATCTCGATTACACGGAAGTTAA  
GCGCGGAAACTCGGTCTACTTCGTTCATCCACTATAGGCGGCCAAAGTTACGCCAGGCACAAATATCAACAAAAATCGATAATGATGAGACGGAATATAGCCTCC  
CAGATGAGAATCAAGATGACATTATCGACGTTGTGCCTGACGAAAAAGAAGGCAAATGGTCATGTTGAGTAAAGAAGAACTGGCGCTTCTCGAAGAGTTGC  
GCAAGGCAAAGACTCGCAAATAG

>pL100-3 (CP034747)

ATGAGCGAAAACGGCAATAAAAACATAGCGATCGTTGAAGCATTTCAGAAACAGATAAAAAGACAGGCGAAGTTGTTACGTTGGTTCCTAACACTAATAACA  
CTGTTTCAGCCTGTTGCTTTGATGCGTCTGGGCCTCTTCGTTCCGACGCTGAAATCGACATCCAGAGGAAGAAAGGGGCAAATGGTCTCTATGGATGCCTCTGCT  
GAACTCAAACAGCTGTCTCTGGCAAAAAGCCGAAGGGTACGAAGACATAAGGATCTCTGGCCTTCGGCTTGATATGGATAACGACTTTAAAACGTGGGTGGGAA  
TAATCCACGCGTTTGCCAAACACAAGGTCGTTGGCGATACTGTCACGTTACCATTTCGTTGAGTTTGTAAGGCTGTGTGGCATTCCGACCGCCAGGTCATCAGCG  
AAGTTACGCAAACGCCTGGACAGTTCGCTAAGCCGATTGCCACAAATACCATCTCGTTCGGTAGCAAAGGCTCTGATGAGTTTTACGTAACGCATCTTGTGCA  
AACGGCAAAAATATAGTGTCAAGCACGATACGGTCGAACTGAAAGCAGATCCCAAGATTTTCGAACTCTACCAGTTCGACAAAAAGGTTCTTCTGCAACTCCGG  
GCTATAAACGAACTCTCAAGAAAAGAATCCGCTCAGGCGCTTTATACTTTTATTGAAAGTTTGCCGCCTGATCCGGCACCAATATCACTAGCCCCTTACGCGCC  
AGACTTAATCTGACAAGTCGCACTATTACTCAGAATGCGACGGTAAGAAAGGCTATGGAACAGCTGCGAGAGATAGGATATCTCGATTACACGGAAGTTAAGC  
GCGGAAACTCGGTCTACTTCGTCATCCACTATAGGCGGCCAAAGTTACGCCAGGCACAAATATCAACAAAAATCGATAATGATGAGACGGAATATAGCCTCCCA  
GATGAGAATCAAGATGACATTATCGACGTTGTGCCTGACGAAAAAGAAGGCAAATGGTCATGTTGAGTAAAGAAGAAGTGGCGCTTCTCGAAGAGTTGCGC  
AAGGCAAAGACTCGCAAATAG

>pGD31-F25 (CP031294)

ATGAGCGAAAACGGCAATAAAAACATAGCGATCGTTGAAGCATTTCAGAAACAGATAAAAAGACAGGCGAAGTTGTTACGTTGGTTCCTAACACTAATAACA  
CTGTTTCAGCCTGTTGCTTTGATGCGTCTGGGCCTCTTCGTTCCGACGCTGAAATCGACATCCAGAGGAAGAAAGGGGCAAATGGTCTCTATGGATGCCTCTGCT  
GAACTCAAACAGCTGTCTCTGGCAAAAAGCCGAAGGGTACGAAGACATAAGGATCTCTGGCCTTCGGCTTGATATGGATAACGACTTTAAAACGTGGGTGGGAA  
TAATCCACGCGTTTGCCAAACACAAGGTTGTTGGCGATACTGTCACGTTGCCGTTTCGTTGAGTTTGTAAGGCTGTGTGGCATTCCGACCGCCAGGTCATCAGCG  
AAGTTACGCAAACGCCTGGACAGTTCGCTAAGCCGATTGCCACAAATACCATCTCGTTCGGTAGCAAAGGCTCTGATGAGTTTTACGTAACGCATCTTGTGCA  
AACGGCAAAAATATAGTGTCAAGCACGATACGGTCGAACTGAAAGCAGATCCCAAGATTTTCGAACTCTACCAGTTCGACAAAAAGGTTCTTCTGCAACTCCGG  
GCTATAAACGAACTCTCAAGAAAAGAATCCGCTCAGGCGCTTTATACTTTTATTGAAAGTTTGCCGCCTGATCCGGCACCAATATCACTAGCCCCTTACGCGCC  
AGACTTAATCTGACAAGTCGCACTATTACTCAGAATGCGACGGTAAGAAAGGCTATGGAACAGCTGCGAGAGATAGGATATCTCGATTACACGGAAGTTAAGC  
GCGGAAACTCGGTCTACTTCGTCATCCACTATAGGCGGCCAAAGTTACGCCAGGCACAAATATCAACAAAAATCGATAATGATGAGACGGAATATAGCCTCCCA  
GATGAGAATCAAGATGACATTATCGACGTTGTGCCTGACGAAAAAGAAGGCAAATGGTCATGTTGAGTAAAGAAGAAGTGGCGCTTCTCGAAGAGTTGCGC  
AAGGCAAAGACTCGCAAATAG

>pSA20094620.2 (CP030187)

ATGAGCGAAAACGACAATAAAAACATTGCGATAAGCGAAGCATTTCAGAAACAGACAAAAAACCGGCGAACTTGTACGTTAGTTCCTAACACCAACAAC

ACAGTCCAGCCCGTTGCTCTCATGCGTTTAGGACTCTTTGTACCCACGCTTAAATCCACAGCAAGGGGTAGAAAGGGACAAATGGTCTCAATGGATGCCACAG  
CTGAACTCAAACAACCTTTCTCTGGCCAAAGCCGAAGGGTATGAGGACATACGGATCTCCGGGATGCGCCTGGATATGGATAATGACTTCAAAAACCTGGGTCGG  
CATCATTTCATGCCTTTGCCAAACATAAGGTAGTTGGCGACACTGTCACGTTATCGTTTGTGCGAGTTCGTCAGGCTTTGCGGCATCCCGACTGCAAGGTCATCAG  
CGAGGCTGCGTAAGCGTCTTGAAGACTCTCTCAACCGTATTGCCACAAACACCATCAAGTTCCGAAGCAAAGGCTCTGAAGAGGTTTACGTAACGCACCTGG  
TGCAAACAGCGAAGTACAGCACCAAGAAAGACACAGTCGAGCTGAAGGCTGATCCTAAAATTTTCGAACTCTACCAATTCGACAAAAAGGTCCTTCTTCAAC  
TACGAGCGATCAACGAACTTTCCAGAAAAGAATCCGCGCAGGCGCTCTACACTTTTCATCGAAAGTTTGCCTCCTGACCCGGCGCCTATCTCAATGGCCCGCTT  
ACGCGCCAGGCTCAATCTAACCAGTCGCACCATTACCCAGAACGCGACAGTCAGGAAGGCGATGGAGCAGCTGCGGGAGATCGGCTATCTCGACTACACAGA  
AGTGAAACGCGGTAGTTCTGTTTATTTTCATTATCCACTATAGACGGCCAAAGTTGCGACCGGCTCAGATACCGGTCAAAGTCGGGCCAGACGAGCCTGAAGAT  
AATTTCCCTGATGAAACTCAGGAGGACATCATCGATGTTGTCCCGGAAGAAAAAGAATGCAAGATGGTCATGTTGAGCAAAGAAGAAGTGGCGATTCTCGAA  
GAACTGCGTAAGGCAAAGCGCTTAAATGA

>pAR-0407-3 (CP044180)

ATGAGCGAAAACGACAATAAAAACATTGCGATAAGCGAAGCATTTCGAAACAGACAAAAAACCGGCGAACTTGTTACGTTAGTTCCTAACACCAACAAC  
ACAGTCCAGCCCGTTGCTCTCATGCGTTTAGGACTCTTTGTACCCACGCTTAAATCCACAGCAAGGGGTAGAAAGGGACAAATGGTCTCAATGGATGCCACAG  
CTGAACTCAAACAACCTTTCTCTGGCCAAAGCCGAAGGGTATGAGGACATACGGATCTCCGGGATGCGCCTGGATATGGATAATGACTTCAAAAACCTGGGTCGG  
CATCATTTCATGCCTTTGCCAAACATAAGGTAGTTGGCGACACTGTCACGTTATCGTTTGTGCGAGTTCGTCAGGCTTTGCGGCATCCCGACTGCAAGGTCATCAG  
CGAGGCTGCGTAAGCGTCTTGAAGACTCTCTCAACCGTATTGCCACAAACACCATCAAGTTCCGAAGCAAAGGCTCTGAAGAGGTTTACGTAACGCACCTGG  
TGCAAACAGCGAAGTACAGCACCAAGAAAGACACAGTCGAGCTGAAGGCTGATCCTAAAATTTTCGAACTCTACCAATTCGACAAAAAGGTCCTTCTTCAAC  
TACGAGCGATCAACGAACTTTCCAGAAAAGAATCCGCGCAGGCGCTCTACACTTTTCATCGAAAGTTTGCCTCCTGACCCGGCGCCTATCTCAATGGCCCGCTT  
ACGCGCCAGGCTCAATCTAACCAGTCGCACCATTACCCAGAACGCGACAGTCAGGAAGGCGATGGAGCAGCTGCGGGAGATCGGCTATCTCGACTACACAGA  
AGTGAAACGCGGTAGTTCTGTTTATTTTCATTATCCACTATAGACGGCCAAAGTTGCGACCGGCTCAGATACCGGTCAAAGTCGGGCCAGACGAGCCTGAAGAT  
AATTTCCCTGATGAAACTCAGGAGGACATCATCGATGTTGTCCCGGAAGAAAAAGAATGCAAGATGGTCATGTTGAGCAAAGAAGAAGTGGCGATTCTCGAA  
GAACTGCGTAAGGCAAAGCGCTTAAATGA

>pRHB20-C15\_2 (CP057633)

ATGAGTGA AACGACAATAAAAACATAGCGATAATTGAGGCTTTCTCCGAAACCGATAAAAAGACCGGGGAAGTTGTTACGTTAGTTCCTAACACCAACAACA  
CTGTCCAGCCTGTCGCTCTGATGCGTTTAGGACTATTGTTCCAACATTGAAATCCACTGCGAGGGGCAGAAAGGGACAAATGGTGTGATGGACGCCACCGA  
AGA ACTGAAGCAACTGTCGCTGGCCAAAGCTGAAGGCTATGAGGATATCCGCATCTCAGGTCTCAGGCTGGACATGGATAATGATTTTAAGACGTGGGTAGGG

ATTATCCATGCCTTCGCCAAGCACAAAGGTCGTAGGCGGACACTGTCACGTTGCCATTCGTTGAGTTCGTCCGACTGTGCGGTATTCTACCGCCAGGTCTTCCGC  
AAAGCTGCGTAAGCGACTGGACAGCTCACTCAGCCGTATCGCCACGAACACCATTTCTTTTCGTAGCAAAGGTTTACGTAACGCACCTGGTA  
CAGACGGCAAAGTACAGTACCAAGAACGACACGGTAGAGCTGAAGGCTGACCCGAAGATTTTCGAACTCTACCAGTTCGACAAGAAGGTACTGCTACA  
GCGAGCCATCAACGAACTCTCAAGAAAAGAGTTCGGCCAGGCGCTCTACACGTTTCATCGAGAGTTTGCCACCTGATCCGGCACCGATATCACTCGCACGTTT  
CGTGCCAGACTTAATCTCACCAGCCGTACCATTACCCAGAATGCGACAGTCAGGAAGGCAATGGATCAGCTCAAAGAGATTGGTTATCTCGATTTACCCGAAG  
TGAAGCGCGGAAGCTCTGTGTATTTTATTATCCACTATAGACATCCGAAATTACGCCCGGCCAGATACCGACCAACGCAGGTGTCGATGAGTCGGATGATGATA  
TCCCAGATGACGTAGTGGAAGGACAGCAGGATGAGCAGGGGGAAATGGTAATGTTGAGCAAGGAAGAAGTGGCGATCCTCGAAGAGCTGCGCAAGGCCAAA  
TCGAAAAAGTGA

>pRHB20-C16\_2 (CP057631)

ATGAGTGAAAACGACAATAAAAACATAGCGATAATTGAGGCTTTCTCCGAAACCGATAAAAAGACCGGGGAAGTTGTTACGTTAGTTCCTAACACCAACAACA  
CTGTCCAGCCTGTCGCTCTGATGCGTTTAGGACTATTCGTTCCAACATTGAAATCCACTGCGAGGGGCAGAAAGGGACAAATGGTGTGATGGACGCCACCGA  
AGAAGTGAAGCAACTGTCGCTGGCCAAAGCTGAAGGCTATGAGGATATCCGCATCTCAGGTCTCAGGCTGGACATGGATAATGATTTTAAGACGTGGGTAGGG  
ATTATCCATGCCTTCGCCAAGCACAAAGGTCGTAGGCGGACACTGTCACGTTGCCATTCGTTGAGTTCGTCCGACTGTGCGGTATTCTACCGCCAGGTCTTCCGC  
AAAGCTGCGTAAGCGACTGGACAGCTCACTCAGCCGTATCGCCACGAACACCATTTCTTTTCGTAGCAAAGGTTTACGTAACGCACCTGGTA  
CAGACGGCAAAGTACAGTACCAAGAACGACACGGTAGAGCTGAAGGCTGACCCGAAGATTTTCGAACTCTACCAGTTCGACAAGAAGGTACTGCTACA  
GCGAGCCATCAACGAACTCTCAAGAAAAGAGTTCGGCCAGGCGCTCTACACGTTTCATCGAGAGTTTGCCACCTGATCCGGCACCGATATCACTCGCACGTTT  
CGTGCCAGACTTAATCTCACCAGCCGTACCATTACCCAGAATGCGACAGTCAGGAAGGCAATGGATCAGCTCAAAGAGATTGGTTATCTCGATTTACCCGAAG  
TGAAGCGCGGAAGCTCTGTGTATTTTATTATCCACTATAGACATCCGAAATTACGCCCGGCCAGATACCGACCAACGCAGGTGTCGATGAGTCGGATGATGATA  
TCCCAGATGACGTAGTGGAAGGACAGCAGGATGAGCAGGGGGAAATGGTAATGTTGAGCAAGGAAGAAGTGGCGATCCTCGAAGAGCTGCGCAAGGCCAAA  
TCGAAAAAGTGA

>pPagL15\_1 (CP034149)

ATGGCAGATAAAGACAACGAAAACAAAGCGTTACTTGAACCTTTCTGTACAGTGACAAAAACAGCGGTGAAGTTATTTCAGCTTCATCCCAACAAGAATAATA  
CCGTTACGCCTGTCGCTTTAATGCGTCTTGGGCTGTTTCGTGCCGACGCTGAAATCTACTGCACGCGGTAAATCCGGTGCGATGGCATCAACGGATGCGACGAA  
AGAGCTGAAGAATCTGACGCTGGTGAAAGCGGAAGGCTACGAAAAGATTACCATTACCGGCGCGCGGCTGGATATGGATAACGATTTCAAACCTGGGCGGG  
TATTATTCAATCGTTTTCCCGCTATCCGACCAAGGCGATACTGTCACGCTGCCGTTTATCGACTTTGTTAAGATGTGTGGCATTCCCTCTGCCAACTCTTCAGCC  
GCCCTGCGCAAGCGTCTTGATGCCTCTCTGCGCCGTATCGCGACCAATACGCTCTCTTTTGAAGGTAACGGCAAGGCCTATCACACCCACCTTGTTCACTCTGC

TTATTACGATCGCGAAAAAGATATTGTGCGCATCCAGGCCGACCCCAAGCTGTTCGAACTCTATAACTTCGACCACAAGGTCCTGCTTCAGCTCCGTGCAATAT  
CCCGTTTGAAGCGTAAAGAGTCTGCGCAGGCGCTTTACACCTTCTGGAAAGCCTGCCAACCAATCCGGCGCCTATCTCGCTTGACGCCTGCGTATGCGCCT  
GAACCTCGGCTCTAAGACCACCACGCAGAACCATGTCGTGCGGCGCGGATGGAGCAGCTGAAAGAGATCGGTTATCTGGATTACTCAGAAGTGAAGCGTGG  
CCGCTCAGTCTTTTTTATTATCCACAGCCGTACGCCTAAGCTTGATGGCATCAGTAATCTTGAGAGCATCGATTGCTGGATGAGATCGAGTTTGATGATTAA

>pCFSAN047153\_1 (CP034470)

ATGGCAGATAAAGACAACGAAAACAAAGCGTTACTTGAACCTTTTCTGTCAGTGACAAAAACAGCGGTGAAGTTATTCAGCTTCATCCAACAAGAATAATA  
CCGTTTCAGCCTGTCGCTTTAATGCGTCTTGGGCTGTTTCGTACCGACGCTGAAATCTACTGCACGCGGTAAATCCGGTGCTATGGCATCAACGGATGCGACGAAA  
GAGCTGAAGAATCTGACGCTGGTAAAAGCGGAAGGCTACGAAAAGATTACCATTACCGGCGCGCGGCTGGATATGGATAACGATTTCAAACCTGGGCGGGT  
ATTATTCAATCTTTTTCCCGCTATCCGACCAAAGGCGATAACCGTCACGCTGCCGTTTATCGATTTTGTGAAGATGTGTGGCATTCCCTCTGCCAACTCTTCAGCTG  
CCCTGCGCAAGCGTCTTGATGCCTCTCTGCGCCGTATCGCGACCAATACGCTCTCTTTGAAGGCAACGGCAAGGCCTATCACACCCACCTTGTTTCAGTCTGCT  
TATTACGATCGCGAAAAAGATATTGTGCGCATCCAGGCCGACCCCAAGCTGTTTCGAACTCTATAACTTCGACCACAAGGTCCTGCTTCAGCTCCGTGCGATATC  
CCGTCTGAAGCGTAAAGAGTCTGCGCAGGCGCTTTACACTTTTCTGGAAAGCCTGCCAACCAATCCAGCGCCTATCTCGCTTGACGCCTGCGTATGCGCCTG  
AACCTCGGCTCTAAGACCACCACGCAGAACCATGTCGTGCGGCGCGGATGGAGCAGCTGAAAGAGATCGGTTATCTGGATTACTCAGAAGTGAAGCGTGGC  
CGCTCAGTCTTTTTTATTATCCACAGCCGTACGCCTAAGCTTGATGGCATCAGTAATCTGGAGAGCATCGATTGCTGGATGAGATCGAGTTTGATGATTAA

>pASB05p1 (CP046723)

ATGGCAGATAAAGACAACGAAAACAAAGCGTTACTTGAACCTTTTCTGTCAGTGACAAAAACAGCGGTGAAGTTATTCAGCTTCATCCAACAAGAATAATA  
CTGTTTCAGCCCCTGCGCTTTAATGCGTCTTGGGCTGTTTCGTGCCGACGCTGAAATCTACTGCACGCGGTAAATCCGGTGCGATGGCATCAACAGATGCGACGAA  
AGAGCTGAAGAATCTGACGCTGGTAAAAGCGGAAGGCTACGAAAAGATTACCATTACCGGCGCGCGGCTGGATATGGATAACGATTTCAAACCTGGGCGGG  
TATTATTCAATCGTTTTCCCGCTATCCGACCAAAGGCGATAACCGTCACGCTGCCGTTTATCGATTTTGTGAAGATGTGTGGCATTCCCTCTGCCAACTCTTCAGCC  
GCCCTGCGCAAGCGTCTTGATGCCTCTCTGCGCCGCATCGCGACCAATACGCTCTCTTTTGAAGGCAACGGCAAGGCCTATCATACCCACCTTGTTTCAGTCTGC  
TTATTACGATCGCGAAAAAGATATTGTGCGCATCCAGGCCGACCCCAAGCTGTTTCGAACTCTATAACTTCGACCACAAGGTCCTGCTTCAGCTCCGTGCGATAT  
CCCGTCTGAAGCGTAAAGAGTCTGCGCAGGCGCTTTACACCTTCTGGAAAGCCTGCCAACTAATCCAGCGCCTATCTCGCTTGACGCCTGCGTATGCGCCT  
GAATCTCGGCTCTAAGACCACCACGCAGAACCATGTCGTGCGGCGCGGATGGAGCAGCTGAAAGAGATCGGTTATCTGGATTACTCAGAAGTGAAGCGTGG  
CCGCTCAGTCTTTTTTATTATCCACAGCCGTACGCCTAAGCTTGATGGCATCAGTAATCTTGAGAGCATCGATTGCTGGATGAGATCGAGTTTGATGATTAA

>pVag1 (CP038854)

ATGGCAGATAAAGACAACGAAAACAAAGCGTTACTTGAACCTTTTCTGTCAGTGACAAAAACAGTGGTGAAGTTATTCAGCTTCATCCAACAAGAATAATA

CCGTTTCAGCCGGTGGCGCTGATGCGTCTTGGACTGTTTCGTGCCGACGCTGAAATCAACCGCACGGGGTAAATCCGGTGCATGGCATCAACGGATGCGACGA  
AAGAGCTGAAGAATCTGACGCTGGTAAAGGCGGAAGGCTACGAAAAGATTACCATTACCGGCGCTCGGCTGGATATGGATAACGATTTCAAACCTGGGCAG  
GTATTATTCAGTCCTTTTCGCGTTATCCGACCAAAGGCGATACCGTCACTGCGTTTATCGATTTTGTGAAGATGTGCGGCATTCCCTCTGCTAACTCGTCTGC  
CGCACTGCGTAAGCGTCTTGATGCCTCTCTGCGCCGATTGCAACTAACACGCTCTCTTTTGAAGGTAACGGCAAGGCGTATCATACCCACCTTGTCCAGTCAG  
CCTATTACGACCGCGAAAAAGATATTGTGCGGATTCAGGCGGATCCCAAACCTGTTTGAACCTCTACAACCTTCGATCACAAGGTACTGCTGCAGCTTCGTGCAATA  
TCCCGCCTTAAGCGTAAAGAGTCTGCACAGGCGCTCTATACCTTCCTTGAGAGTCTGCCGACCAATCCGGCACCGATATCGCTGGCACGCCTGCGTATGCGCCT  
TAATCTCGGCTCTAAGACCACTACGCAGAACCATGTGGTGCGGCGTGCAATGGAGCAACTGAAGGAGATTGGTTATCTGGATTATTCAGAAGTGAAGCGTGGC  
CGCTCAGTCTTTTTTCATTATCCATAGTCGCACACCTAAGCTTGATGGCATCGGTAATCTGGAGAGCATCGATTTCGCTGGACGAGATCGAGTTTGAGGATTAA

>pPag3 (CP001895)

ATGGCAGATAAAGACAACGAAAACAAAGCGTTACTTGAACCTTTTCTGTCAGTGACCAAAAACAGTGGTGAAGTTATTCAGCTTCATCCCAACAAGAATAATA  
CCGTTTCAGCCGGTGGCACTGATGCGTCTTGGACTGTTTCGTTCGACGCTGAAATCAACCGCACGGGGTAAATCCGGTGCATGGCATCAACGGATGCGACGAA  
AGAGCTGAAGAATCTTACGTTGGTAAAGGCGGAAGGCTACGAAAAGATTACCATTACCGGCGCACGGCTGGATATGGATAACGATTTCAAACCTTGGGCAGGT  
ATTATTCAGTCCTTTTCGCGCTATCCGACTAAAGGCGATACCGTCACTGCGTTTATCGATTTTGTGAAGATGTGCGGCATTCCCTCTGCCAACTCGTCTGCC  
GCACTGCGTAAGCGTCTTGATGCCTCTCTGCGCCGATTGCAACTAACACGCTCTCTTTTGAAGGCAACGGCAAGGCGTATCATACCCACCTTGTCCAGTCAGC  
CTATTACGACCGCGAAAAAGATATTGTGCGGATTCAGGCAGATCCCAAACCTGTTTGAACCTCTACAACCTTCGATCACAAGGTACTGCTGCAGCTTCGTGCAATAT  
CCCGCCTTAAGCGTAAAGAGTCTGCACAGGCGCTCTATACTTTCCTTGAGAGCCTGCCGACCAATCCGGCACCGATATCACTGGCACGCCTGCGTATGCGCCTT  
AATCTCGGCTCTAAGACCACCACGCAGAACCATGTGGTGCGGCGTGCAATGGAGCAACTGAAGGAGATTGGTTATCTGGATTATTCAGAAGTGAAGCGTGGCC  
GCTCAGTCTTTTTTCATTATCCATAGTCGCACACCTAAGCTTGATGGCATCGGTAATCTGGAGAGCATCGATTTCGCTGGACGAGATCGAGTTTGAGGATTAA

>pCP014127 (CP014127)

ATGGCAGATAAAGACAACGAAAACAAAGCGTTACTTGAACCTTTTCTGTCAGTGACAAAAACAGTGGTGAAGTTATTCAGCTTCATCCCAACAAGAATAATA  
CCGTTTCAGCCGGTGGCATTGATGCGTCTTGGACTGTTTCGTGCCGACGCTGAAATCAACCGCACGGGGTAAATCCGGTGCATGGCATCAACGGATGCGACGAA  
AGAGCTAAAGAATCTGACGCTGGTAAAGGCGGAAGGCTACGAAAAGATTACCATTACCGGCGCACGCCTGGATATGGATAACGATTTCAAACCTGGGCAGGT  
ATTATTCAGTCCTTTTCGCGCTATCCTACCAAAGGCGATACCGTCACTGCGTTTATCGATTTTGTGAAGATGTGCGGCATTCCCTCTGCTAACTCGTCTGCCG  
CACTGCGTAAGCGTCTTGATGCCTCTCTGCGCCGATTGCAACTAACACGCTCTCTTTTGAAGGCAACGGCAAGGCGTATCATACCCACCTTGTCCAGTCAGCT  
TATTACGACCGTGAAAAAGATATTGTTTCGATTTCAGGCGGATCCCAAACCTGTTTGAACCTCTACAACCTTTGATCACAAGGTGCTGCTTCAGCTTCGTGCAATATCC  
CGCCTTAAGCGTAAAGAGTCTGCACAAGCCCTCTATACCTTCCTTGAGAGCCTGCCTACCAATCCGGCTCCGATATCGCTGGCACGCCTACGTATGCGCCTTAAT



CTCGGCTCTAAGACCACCACGCAGAACCATGTGGTGCGGGCTGCGATGGAGCAATTGAAGGAAATTGGTTATCTGGATTATTCAGAAGTTAAACGTGGCCGCT  
CAGTCTTTTTTATTATCCATAGCCGCACACCTAAGCTTGATGGCATCGGTAATCTGGAGAGTATCGATTTCGCTGGATGAGATCGAGTTTGAGGATTA

>pPant1 (CP022517)

ATGGCAGATAAAGACAACGAAAACAAAGCGTACTAGAACCTTTTCTGTCTGTGACAAAAACAGTGGTGAAGTTATCCAGCTTCATCCCAACAAGAATAATA  
CCGTTTCAGCCCGTCGCATTAATGCGTCTCGGGCTCTTTGTGCCAACGCTGAAATCGACCGCTCGCGGGAAATCCGGGGCGATGGCCTCAACAGATGCGACGAA  
AGAGCTAAAGAACCTGACGCTGGTGAAGCGGAGGGTTACGAAAAGATTACCATTACCGGCGCGCGGCTGGATATGGATAACGATTTCAAACCTGGGCAGG  
TATTATTCAGTCATTCTCGCGTTATCCGACCAAAGGCGACACGGTCACCCTGCCGTTTATTGATTTTGTGAAGATGTGCGGCATTCCCTCTGCTAACTCTTCTGCT  
GCGCTACGAAAACGCCTTGATGCCTCGCTACGACGTATTGCGACCAATACCCTCTCCTTTGAAGGCAATGGCAAGGCGTATCATACCCACCTGGTGCAGTCTGC  
TTATTACGACCGTGAAAAAGATATCGTCCGCATTCAGGCTGATCCTAAGCTGTTTCGAACTTTATAATTTTCGACCACAAAGTACTGCTTCAGCTCCGGGCCATCTC  
CCGCCTCAAGCGTAAAGAGTCTGCGCAGGCGCTCTACACCTTCCCTGGAGAGTCTGCCGACCAATCCGGCACCCATCTCCCTTGCACGTTTGCATGCGTCTT  
AACCTCGGTTCAAAGACCACTACGCAGAACCACGTGGTAAGGCGCGCGATGGAGCAGCTAAAAGAGATCGGTTATCTGGATTATTCAGAAGTGAAGCGCGGC  
CGCTCTGTGTTTTTTCATTATTCACAGTCGCACGCCTAAGCTTGATGGTATCGGTAATCTGGAGAGCATTGATTCGCTGGATGAGATCGAGTTTGAAGATTA

>pCP061084 (CP061084)

ATGGCAGATAAAGACAACGAAAACAAAGCGTACTAGAACCTTTTCTGTCTGTGACAAAAACAGTGGTGAAGTTATCCAGCTTCATCCCAACAAGAATAATA  
CCGTTTCAGCCCGTCGCATTAATGCGTCTCGGGCTCTTTGTGCCAACGCTGAAATCGACCGCTCGCGGGAAATCCGGGGCGATGGCCTCAACAGATGCGACGAA  
AGAGCTAAAGAACCTGACGCTGGTGAAGCGGAGGGTTACGAAAAGATTACCATTACCGGCGCGCGGCTGGATATGGATAACGATTTCAAACCTGGGCAGG  
TATTATTCAGTCATTCTCGCGTTATCCGACCAAAGGCGACACGGTCACCCTGCCGTTTATTGATTTTGTGAAGATGTGCGGCATTCCCTCTGCTAACTCTTCTGCT  
GCGCTACGAAAACGCCTTGATGCCTCGCTACGACGTATTGCGACCAATACCCTCTCCTTTGAAGGCAATGGCAAGGCGTATCATACCCACCTGGTGCAGTCTGC  
TTATTACGACCGTGAAAAAGATATCGTCCGCATTCAGGCTGATCCTAAGCTGTTTCGAACTTTATAATTTTCGACCACAAAGTACTGCTTCAGCTCCGGGCCATCTC  
CCGCCTCAAGCGTAAAGAGTCTGCGCAGGCGCTCTACACCTTCCCTGGAGAGTCTGCCGACCAATCCGGCACCCATCTCCCTTGCACGTTTGCATGCGTCTT  
AACCTCGGTTCAAAGACCACTACGCAGAACCACGTGGTAAGGCGCGCGATGGAGCAGCTAAAAGAGATCGGTTATCTGGATTATTCAGAAGTGAAGCGCGGC  
CGCTCTGTGTTTTTTCATTATTCACAGTCGCACGCCTAAGCTTGATGGTATCGGTAATCTGGAGAGCATTGATTCGCTGGATGAGATCGAGTTTGAAGATTA

>pEuc1 (CP045721)

ATGGCAGATAAAGACAACGAAAACAAAGCGTACTAGAACCTTTTCTGTCTGTGACAAAAACAGTGGTGAAGTTATCCAGCTTCATCCCAACAAGAATAATA  
CCGTTTCAGCCCGTCGCATTAATGCGTCTCGGGCTCTTTGTGCCAACGCTGAAATCGACCGCTCGCGGGAAATCCGGGGCGATGGCCTCAACAGATGCGACGAA  
AGAGCTAAAGAACCTGACGCTGGTGAAGCGGAGGGTTACGAAAAGATTACCATTACCGGCGCGCGGCTGGATATGGATAACGATTTCAAACCTGGGCAGG

TATTATTCAGTCATTCTCGCGTTATCCGACCAAAGGCGACACGGTCACCCTGCCGTTTATTGATTTTGTGAAGATGTGCGGCATTCCCTCTGCTAACTCTTCCGCT  
GCGCTACGAAAACGCCTTGATGCCTCGCTACGACGTATTGCGACCAATACCCTCTCCTTTGAAGGCAATGGCAAGGCGTATCATACCACCTGGTGCAGTCTGC  
TTATTACGACCGTGAAAAAGATATCGTCCGCATTACAGGCTGATCCTAAGCTGTTTGAACCTTTATAATTTGACCACAAAGTACTGCTTCAGCTCCGGGCCATCTC  
CCGCCTCAAGCGTAAAGAGTCTGCGCAGGCGCTCTACACCTTCCCTGGAGAGTCTGCCGACCAATCCGGCACCCATCTCCCTTGCACGTTTGGCGCATGCGTCTT  
AACCTCGGTTCAAAGACCACTACGCAGAACCACGTGGTAAGGCGCGCGATGGAGCAGCTAAAAGAGATCGGTTATCTGGATTATTCAGAAGTGAAGCGCGGC  
CGCTCTGTGTTTTTTCATTATTCACAGTCGCACGCCTAAGCTTGATGGTATCGGTAATCTGGAGAGCATTGATTCGCTGGATGAGATCGAGTTTGAAGATTAA

>pPANA10 (HE617161)

ATGGCAGATAAAGATAGTGAAAACAAAGCGTTACTAGAGCCTTTTCTGTCTGTGACCAAAAACAGTGGTGAAGTTATTCAGCTTCATCCCAACAAAATAATA  
CCGTTTACGCCCCTGGCCTTAATGCGTCTGGGACTCTTTGTTCCACGCTTAAATCCACAGCGCGGGGCATTTCTGGTGCTATGGCTTCAACCGATGCCACCAAA  
GAGCTTAAAAACCTCTCTCTGGTTAAAGCGGAAGGCTATGAAAAGATTACCATCACCGGTGCCAGACTGGATATGGATAATGACTTTAAGACCTGGGCCGGTAT  
TATTCAGTCTTTTTCCCGTTACCCACACAGGGTGATACGGTAACCCTGCCTTTTATTGATTTTCGTGAAGATGTGCGGTATTCCCTCCGCCAACTCCTCTGCCGCA  
TTGCGTAAGCGACTCGACGCTTCGTTACGCCGATTGCGACGAACACTCTCTCTTTTGAAGGTAACGGTAAGGCCTATCATAACGCATCTGGTACAGTCAGCTTAT  
TACGATCGTGAAAAAGACATTGTCCGCATACAGGCTGATCCCAAGCTCTTTGAGCTGTATAACTTCGACCACAAGGTTTTACTGCAGCTGAGGGCTATCTCCCG  
CCTTAAGCGTAAAGAATCGGCTCAGGCGCTTATACGTTCCCTGGAGAGCCTGCCGACCAACCCTGCGCCCATTTCTCTTGCCCCGCTTACGTATGCGGCTCAATC  
TTGGCTCAAAGATTACCACGCAGAATCACGTGGTACGACGCGCGATGGAACAGCTTAAAGAGATTGGCTACCTTGATTACTCTGAAGTCAAACGAGGCCGCTC  
CGTATTTTTTCATCATTACAGCAGAACACCGAAACTCGATGGAATCAGTAACCTGGAAGGAATCGATACGCTCGATGACATCGATTTTGAAGACTGA

>pEA320 DNA (CP028034)

ATGGCAGATAAAGATAGTGAAAACAAAGCGTTACTAGAGCCTTTTCTGTCTGTGACCAAAAACAGTGGTGAAGTTATTCAGCTTCATCCCAACAAAATAATA  
CCGTTTACGCCCCTGGCCTTAATGCGTCTGGGACTCTTTGTTCCACGCTTAAATCCACAGCGCGGGGCATTTCTGGTGCTATGGCTTCAACCGATGCCACCAAA  
GAGCTTAAAAACCTCTCTCTGGTTAAAGCGGAAGGTTATGAAAAGATTACCATCACCGGTGCCAGACTGGATATGGATAATGACTTTAAGACCTGGGCCGGTAT  
TATTCAGTCTTTTTCCCGTTACCCACACAGGGTGATACGGTAACCCTGCCTTTTATTGATTTTCGTGAAGATGTGCGGTATTCCCTCCGCCAACTCCTCTGCCGCA  
TTGCGTAAGCGACTCGACGCTTCGTTACGCCGATTGCGACGAACACTCTCTCTTTTGAAGGTAACGGTAAGGCCTATCATAACGCATCTGGTACAGTCAGCTTAT  
TACGATCGTGAAAAAGACATTGTCCGCATACAGGCTGATCCCAAGCTCTTTGAGCTGTATAACTTCGACCACAAGGTTTTACTGCAGCTGAGGGCTATCTCCCG  
CCTTAAGCGTAAAGAATCGGCTCAGGCGCTTATACGTTCCCTGGAGAGCCTGCCGACCAACCCTGCGCCCATTTCTCTTGCCCCGCTTACGTATGCGGCTCAATC  
TTGGCTCAAAGATTACCACGCAGAATCACGTGGTACGACGCGCGATGGAACAGCTTAAAGAGATTGGCTACCTTGATTACTCTGAAGTCAAACGAGGCCGCTC  
CGTATTTTTTCATCATTACAGCAGAACACCGAAACTCGATGGAATCAGTAACCTGGAAGGAATCGATACGCTCGATGACATCGATTTTGAAGACTGA

>pCP035036 (CP035036)

ATGGCAGATAAAGATAGTGAAAACAAAGCGTTACTAGAGCCTTTTCTGTCTGTGACCAAAAACAGTGGTGAAGTTATTCAGCTTCATCCCAACAAAAATAATA  
CCGTTTCAGCCCGTGGCCTTAATGCGTCTGGGACTCTTTGTTCCACGCTTAAATCCACAGCGCGGGGCATTTCTGGTGCTATGGCTTCAACCGATGCCACCAAA  
GAGCTTAAAAACCTCTCTCTGGTTAAAGCGGAAGGCTATGAAAAGATTACCATCACCGGTGCCAGACTGGATATGGATAATGACTTTAAGACCTGGGCCGGCAT  
TATTCAGTCTTTTTCCCGTTACCCTACACAGGGTGATACGGTAACCCTGCCTTTTATTGATTTTCGTGAAGATGTGCGGTATTCCCTCCGCCAACTCCTCTGCCGCA  
TTGCGTAAGCGACTCGACGCTTCGTTACGCCGATTGCGACGAACACTCTCTTTTTGAAGGTAACGGTAAGGCCTATCATACGCATCTGGTACAGTCAGCTTAT  
TACGATCGTGAAAAAGACATTGTTTCGCATACAGGCTGATCCCAAGCTCTTTGAGCTGTATAACTTCGACCACAAGGTTTTACTGCAGCTGAGGGCTATCTCCCG  
CCTTAAGCGTAAAGAATCGGCTCAGGCGCTTTATACGTTCCCTGGAGAGCCTGCCGACCAACCCTGCGCCCATTTCTCTTGCCCGCTTACGTATGCGGCTCAATC  
TTGGCTCAAAGATTACCACGCAGAATCACGTGGTACGACGCGGATGGAACAGCTTAAAGAGATTGGCTACCTTGATTACTCTGAAGTCAAACGAGGCCGCTC  
CGTATTTTTTCATCATTACAGCAGAACACCGAAACTCGATGGAATCAGTAACCTGGAAGGAATCGATACGCTCGATGAGATCGATTTTGAAGACTGA

>pCP049116 (CP049116)

ATGGCAGATAAAGATAGTGAAAACAAAGCGTTACTAGAGCCTTTTCTGTCTGTGACTAAAAACAGCGGTGAAGTTATTCAGCTTCATCCCAATAAAAAATAACAC  
TGTTTCAGCCTGTTGCCTTGATGCGACTGGGACTGTTTGTACCAACGCTTAAATCCACCGCGCGCGGGATTTTCAGGCGCGATGGCGTCCACGGATGCGACGAAA  
GAACTTAAAAACCTCTCGCTGGTGAAAAGCGGAAGGGTATGAAAAGATTACCATCACCGGTGCCAGGCTGGATATGGATAATGATTTCAAGACATGGGCAGGCA  
TCATCCAGTCTTTTTTCGCGTTATCCTACTCAGGGCGATACGGTACGCTGCCCTTTATCGATTTTCGTAAAATGTGTGGAATACCATCAGCAAACCTCTTCTGCTGC  
CTTACGTAAGCGGCTTGATGCATCCCTACGGCGAATTGCGACCAATACGCTGTCCTTTGAAGGAAACGGTAAGGCCTATCACACGCACCTTGTTTCAGTCTGCCT  
ACTATGATCGTGAAAAAGATATTGTTTCGCATACAAGCTGATCCCAAGCTTTTTGAGCTCTATAACTTCGATCACAAGGTTTTACTTCAGCTACGCGCCATCTCCC  
GTCTGAAACGTAAAGAATCGGCTCAGGCGCTCTATACGTTCCCTGAGAGCCTTCCCACCAACCCTGCGCCTATATCACTGGCACGCCTGCGTATGCGCCTGAAT  
TTAGGATCTAAAATTACGACGCAGAACCACGTTGTGCGACGCGCAATGGAGCAGCTTAAAGAGATTGGCTATCTCGACTATTCTGAAGTCAAACGCGGACGCT  
CTGTGTTTTTTCATTATCCACAGCAGAACGCCTAAACTGGATGGTATCGGCAATCTTGAAGGCATTGATACCCTTGAAGACATTGAATTTGAAGAATAG

>pDSJ10 (CP017591)

ATGGCAGATAAAGATAGTGAAAACAAAGCGTTACTAGAGCCTTTTCTGTCTGTGACTAAAAACAGCGGTGAAGTTATTCAGCTTCATCCCAATAAAAAATAACAC  
TGTTTCAGCCTGTTGCCTTGATGCGACTGGGACTGTTTGTACCAACCCTTAAATCCACCGCGCGCGGGATTTTCAGGCGCGATGGCGTCCACGGATGCGACGAAA  
GAACTTAAAAACCTCTCGCTGGTGAAAAGCGGAAGGGTATGAAAAGATTACCATCACCGGTGCCAGGCTGGATATGGATAATGATTTCAAGACATGGGCAGGCA  
TCATCCAGTCTTTTTTCGCGTTATCCTACTCAGGGCGATACGGTACGCTGCCCTTTATCGATTTTCGTAAAATGTGTGGAATACCTTCAGCAAACCTCTTCTGCTGC  
CTTACGTAAGCGGCTTGATGCATCCCTACGGCGAATTGCGACCAATACCCTGTCATTTGAAGGAAACGGTAAGGCCTATCACACGCACCTTGTTTCAGTCTGCCT

ACTATGATCGTGAAAAAGATATTGTTTCGCATACAAGCTGATCCCAAGCTTTTTGAGCTCTATAACTTCGATCACAAGGTTTTACTTCAGCTACGCGCCATCTCCC  
GTCTGAAACGTAAAGAATCGGCTCAGGCGCTCTATACGTTCCCTTGAGAGCCTTCCCACCAACCCTGCGCCTATATCACTGGCACGCCTGCGTATGCGCCTGAAT  
TTAGGATCTAAAATTACGACGCAGAACCACGTTGTGCGACGCGCAATGGAGCAGCTTAAAGAGATTGGCTATCTCGACTATTCTGAAGTCAAACGCGGACGCT  
CTGTGTTTTTTCATTATCCACAGCAGGACGCCTAAACTGGATGGTATCGGCAATCTTGAAGGCATTGATACCCTTGAAGACATTGAATTTGAAGAATAG

>pCP060162 (CP060162)

ATGGCAGACAAAGAGAGTAAAAACAAGGCGTTACTGGAACCTTTTTCTGTCGGTGACAAAAACAGTGGCGAAGTTATCCAGCTCCATCCTAACAAGAATAAT  
ACTGTCCAGCCTGTGGCACTGATGCGTCTGGGATTGTTTGTCCACCCTTAAATCCACTGCTCGCGCAAATCCGGGGCTATGGCCTCCACTGATGCGACCAA  
AGAGCTGAAAAACCTCTCGCTGGTAAAAGCGGAAGGGTATGAGAAGATCACCATAACCGGTGCCAGACTGGATATGGATAACGATTTCAAACCTGGGCAGG  
GATTATTCAATCCTTCTCCCGTTATCCGACCAAAGGCGACACGGTTACGCTGCCTTTTATCGATTCGTTAAGATGTGTGGTATTCCGTCAGCGAACTCTTCTGCG  
GCCCTGCGCAGGCGTCTGGATGCCTCATTACGGCGCATTGCAACCAATACGCTCTCCTTTGAAGGTAACGGCAAGGCTTATCATACTCACCTTGTACAATCTGC  
CTATTACGATCGGGAAAAAGATCTGGTGCGCATTACAGGCCGATCCGAAGCTGTTTGAGTTATATAACTTTGATCACAAGGTTCTGCTTCAGTTGCGGGCCATTT  
GCGCCTGAAACGTAAAGAGTCTGCTCAGGCGCTCTATACCTATCTGGAAAGCCTTCTGTTAATCCGGCCCCTATCTCGCTGGCGCGACTGCGTATGCGTCTTA  
ACCTGGGATCGAAAACCACCACGCAGAACCATGTGGTGCGGCGTGCTATGGAGCAGCTGAAAGAGATAGGCTATCTCGACTATTCCGAGATTAAGCGTGGACG  
TTCCGTGTTTTTTCATCATCCATAGCAGGACGCCAAGCTGGATGGTATCGGAAATCTGGAGAGCATCGACGTGCTGGATGAGATCGAGTTTGACGACGAGTCGT  
GA

>pPSP-3a9 (CP010326)

ATGGCAGACAAAGAGAGTAAAAACAAGGCGTTACTGGAACCTTTTTCTGTCGGTGACAAAAACAGTGGCGAAGTTATCCAGCTCCATCCTAACAAGAATAAT  
ACTGTCCAGCCTGTGGCACTGATGCGTCTGGGATTGTTTGTCCACCCTTAAATCCACTGCTCGCGCAAATCCGGGGCTATGGCCTCCACTGATGCGACCAA  
AGAGCTGAAAAACCTCTCGCTGGTAAAAGCGGAAGGGTATGAGAAGATCACCATAACCGGTGCCAGACTGGATATGGATAACGATTTCAAACCTGGGCAGG  
GATTATTCAATCCTTCTCCCGTTATCCGACCAAAGGCGACACGGTTACGCTGCCTTTTATCGATTCGTTAAGATGTGTGGTATTCCGTCAGCGAACTCTTCTGCG  
GCCCTGCGCAGGCGTCTGGATGCCTCATTACGGCGCATTGCAACCAATACGCTCTCCTTTGAAGGTAACGGCAAGGCTTATCATACTCACCTTGTACAATCTGC  
CTATTACGATCGGGAAAAAGATCTGGTGCGCATTACAGGCCGATCCGAAGCTGTTTGAGTTATATAACTTTGATCACAAGGTTCTGCTTCAGTTGCGGGCCATTT  
GCGCCTGAAACGTAAAGAGTCTGCTCAGGCGCTCTATACCTATCTGGAAAGCCTTCTGTTAATCCGGCCCCTATCTCGCTGGCGCGACTGCGTATGCGTCTTA  
ACCTGGGATCGAAAACCACCACGCAGAACCATGTGGTGCGGCGTGCTATGGAGCAGCTGAAAGAGATAGGCTATCTCGACTATTCCGAGATTAAGCGTGGACG  
TTCCGTGTTTTTTCATCATCCATAGCAGGACGCCAAGCTGGATGGTATCGGAAATCTGGAGAGCATCGACGTGCTGGATGAGATCGAGTTTGACGACGAGTCGT  
GA

>pEM01 (LN907828)

ATGTTCACTATAATCAGGACATTGCTTTTTCCATCCACAAAAAGAAGATCCGCAGCCATGGCAGATAACATCAATGAAAACAAAGGATTGATTGATCCTTTTCTG  
TCAGTGACCAAACATAATGGTGAAGTTATTCAGCTTCATCCCAATAAAAATAATACCGTTCAGCCTGTTCGCGTTAATGCGTCTTGGGCTGTTTGTGCCGACGCTA  
AAGTCCACGGCCCCGCGCAAATCAGGTGCGATGGCTTCTACCGATGCCACTAAAGAACTCAAGAACTTAACGCTGGTAAAAGCGGAAGGTTATGAGAAGATC  
ACCATAACCGGCGCCCCGGCTGGATATGGATAACGATTTTAAGACCTGGGCCGGGATTATTCAGTCGTTCTCCCGCTATCCCTGCAAAGGCGATACGGTGACGCT  
GCCTTTTGTGATTTTCGTGAAGATGTGCGGTATCCCTCTTCCAGTTTCGTCAGCGGCGCTGCGTAAAAGGCTCGATGCTTCATTACGTCGCATCGCCACCAATAC  
GCTCTCCTTTGAAGGCAACGGCAAAGCCTATCACACGCACCTTGTGCAATCCGCCTATTACGATCGTGAAAAGACATCGTGCGTATTACAGGCCGATCCCAAA  
CTGTTTGAGCTCTACAACCTTCGACCACAAGGTTTTGCTGCAGCTCCGGGCTATCTCCCGACTGAAGCGTAAAGAGTCCGCACAGGCGCTCTATACCTATCTGGA  
GAGCCTTCCAGCCAATCCGGCACCCGTTTTCCCTTGCTCGTCTGCGTATGCGCCTCAATCTGGCCTCCAAGACCACCACGAAAATCATGTGGTGCGTCGTGCAA  
TGGAGCAGTTGCAGGAGATTGGCTACCTCGATTACACCGAAGTGAAGCGTGGCCGTGCCGTCTATTTTATTATCCATAACCGCATGCCTAAGCTGGATGGCATT  
CAGTCGATTGAAGATATCGCTGAGTTTACTGACTTCCCAGTTGAAGAGTAA

>pSC138 (AY509004)

ATGACGAGCGAAAATAATAGCTTACTTCTGAACCTTCAGGAAGTTGATAAGACAACCGGTGAAGTTGTTAAGCTGGATGTCAACAGCACCAGTACCGTGCAGC  
CAGTAGCGCTCATGAGACTCGGTCTCTTCGTCCCAACTCTGAAATCAACAGGGAAGAGCAAGGCGAACCGGAAAAACGTTACAGACGCGACTGAGGAGCTT  
GTACAGCTGGCCATTGCCAAAAGCGAAGGATACACTGACGTTAAGATCACCGGTTTCGCGTCTTGATATGGACACGGATTTTAAAGTCTGGCTGGGGATAATTGC  
CTCCATGTCGGAGTATGGGGTAAAAAGTGACACCCTGGAAGTTCGTTTCGTCGAATTCGTTAAGATGTGCGGATTTGACTCCCGTTCGTTCAAACAAAAAATG  
CGGATCGCATCAGTAATCCCTGTTTAAACTCGCCTCGGTTACGCTGAAGTTCCAGAGCGAGACCAAAGGATGGACCACCCATCTGGTGCAGTCAGCCTATTA  
TGACATCAACGAGGATATCGTTGAGATCAAGGCTGAACCTAAGCTGTTTGAAGCTTTACCACATGGACAGAAGGGTACTGCTGCGGCTGAAAGCCATTGACGCC  
CTGCAGCGCAAGGAATCAGCCCAGGCGCTTTATACCTACATCGAAAGTCTTCCCCAGAATCCTGCACCTATTTCCATGAAACGGATGCGTGACCGGCTGAATCT  
CACCTCAAATGTCTATACACAGAACCACACGGTTCGTAAGGCGATGGAGCAGCTGCGTGATATTGGTTATCTGGATTACACCGAGTTTAAACGTGGCCGAGCC  
ACCTATTTACGCGTGCATTATCGCAACCCCAAACCTCATCAGTAGTCCTGTGAAGGTTCCGCGCAAAGAGGAAGAAGAGAAGGCGCCAGAGCAAATTATGAC  
GAAGTCATTAAGGCGCTGAAGGCTGCTGGCATCGATCCTCTTAAACTGGCTGAAGCCCTCTCAGCGATGAAGCCAGAAAATTGA

>pL21-1NR (MN423365)

ATGACGAGCGAAAATAATAGCTTACTTCTGAACCTTCAGGAAGTTGATAAGACAACCGGTGAAGTTGTTAAGCTGGATGTCAACAGCACCAGTACCGTGCAGC  
CAGTAGCGCTCATGAGACTCGGTCTCTTCGTCCCAACTCTGAAATCAACAGGGAAGAGCAAGGCGAACCGGAAAAACGTTACAGACGCGACTGAGGAGCTT  
GTACAGCTGGCCATTGCCAAAAGCGAAGGATACACTGACGTTAAGATCACCGGTTTCGCGTCTTGATATGGACACGGATTTTAAAGTCTGGCTGGGGATAATTGC

CTCCATGTCGGAGTATGGGGTAAAAAGTGACACCCTGGAAGTTCGTTTCGTCGAATTCGTTAAGATGTGCGGATTTGACTCCCGTCGTTCAAACAAAAAATG  
CGCGATCGCATCAGTAATTCCTGTTTAAACTCGCCTCGGTTACGCTGAAGTTCCAGAGCGAGACCAAAGGATGGACCACCCATCTGGTGCAGTCAGCCTATTA  
TGACATCAACGAGGATATCGTTGAGATCAAGGCTGAACCTAAGCTGTTTGAGCTTTACCACATGGACAGAAGGGTACTGCTGCGGCTGAAAGCCATTGACGCC  
CTGCAGCGCAAGGAATCAGCCCAGGCGCTTTATACCTACATCGAAAGTCTTCCCCAGAATCCTGCACCTATTTCCATGAAACGGATGCGTGACCGGCTGAATCT  
CACCTCAAATGTCTATACACAGAACCACACGGTTCGTAAGGCGATGGAGCAGCTGCGTGATATTGGTTATCTGGATTACACCGAGTTTAAACGTGGCCGAGCC  
ACCTATTTTCAGCGTGCATTATCGCAACCCCAAACCTCATCAGTAGTCCTGTGAAGGTTCCGCGCAAAGAGGAAGAAGAGAAGGCGCCAGAGCAAATTATGAC  
GAAGTCATTAAGGCGCTGAAGGCTGCTGGCATCGATCCTCTTAAACTGGCTGAAGCCCTCTCAGCGATGAAGCCAGAAAATTGA

>pA2508-emrE (MN310379)

ATGACGAGCGAAAATAACAGCTTACTTCTGAACCTTCAGGAGGTTGATAAGACAACCGGTGAAGTTGTTAAGCTGGATGTCAACAGCACCAGTACCGTGCAG  
CCAGTAGCGCTCATGAGACTCGGTCTCTTCGTCCCAACTCTGAAATCAACAGGGAAGAGCAAGGCGAACCGGAAAAACGTTACAGACGCGACTGAGGAGCT  
TGTACAGCTGTCCATTGCCAAAAGCGAAGGATACTGACGTTAAGATCACCGGTTTCGCGTCTTGATATGGACACGGATTTTAAAGTCTGGCTGGGGATAATC  
GCTCCATGTCGGAGTATGGGGTAAAAAGTGACACCCTGGAAGTTCGTTTCGTCGAATTCGTTAAGATGTGCGGATTTGACTCCCGTCGTTCAAACAAAAAAT  
GCGCGATCGCATCAGTAATTCCTGTTTAAACTCGCCTCGGTTACGCTGAAGTTCCAGAGCGAGACCAAAGGATGGACCACACATCTGGTGCAGTCAGCCTATT  
ATGACATCAACGAGGATATCGTTGAGATCAAGGCTGAACCTAAGCTGTTTGAGCTTTACCACATGGACAGAAGGGTACTGCTGCGGCTGAAAGCCATTGACGC  
CCTGCAGCGCAAGGAATCAGCCCAGGCGCTTTATACCTACATCGAAAGTCTTCCCCAGAATCCTGCACCTATTTCCATGAAACGGATGCGTGACCGGCTGAATC  
TCACCTCAAATGTCTATACGCAGAACCACACGGTACGTAAGGCGATGGAGCAGCTGCGGGATATTGGTTATCTGGATTACACTGAGTTTAAACGTGGCCGAGCC  
ACCTATTTTCAGCGTGCATTATCGCAACCCCAAACCTCATCAGTGGTCCTGTGAAGGTTCCGCGCAAAGAGGAAGAAGAGAAGGCGCCAGAGCAAATTATGAC  
GAAGTCATTAAGGCGCTGAAGGCTGCTGGCATCGATCCCCTTAAACTGGCCGAAGCTCTCTCAGCGATGAAGCCAGAAAATTGA

>pBJ20-tetA (MN310373)

ATGACGAGCGAAAATAACAGCTTACTTCTGAACCTTCAGGAAGTTGATAAGACAACCGGCGAAGTTGTTAAGCTGGATGTCAACAGCACCAGTACCGTGCAG  
CCAGTAGCGCTCATGAGACTCGGTCTCTTCGTCCCAACTCTGAAATCAACAGGGAAGAGCAAGGCGAACCGGAAAAACGTTACAGACGCGACTGAGGAGCT  
TGTACAGCTGTCCATTGCCAAAAGCGAAGGGTACTGACGTTAAGATCACCGGTTTCGCGTCTTGATATGGACACGGATTTTAAAGTCTGGCTGGGGATAATC  
GCTCCATGTCGGAGTATGGGGTAAAAAGTGACACCCTGGAAGTTCGTTTCGTCGAATTCGTTAAGATGTGCGGATTTGACTCCCGTCGTTCAAACAAAAAAT  
GCGCGATCGCATCAGTAATTCCTGTTTAAACTCGCCTCGGTTACGTTGAAGTTCCAGAGCGAGACCAAAGGATGGACCACCCATCTGGTGCAGTCAGCCTATT  
ATGACATCAACGAGGATATCGTTGAGATCAAGGCTGAACCTAAGCTGTTTGAGCTTTACCACATGGACAGAAGGGTACTGCTGCGGCTGAAAGCCATTGACGC  
CCTGCAGCGCAAGGAATCAGCCCAGGCGCTTTATACCTACATCGAAAGTCTTCCCCAGAATCCTGCACCTATTTCCATGAAACGGATGCGTGAGCGGCTGAATC

TCACCTCAAATGTCTATAACGCAGAACCACACGGTGCGTAAGGCGATGGAGCAGCTGCGGGATATTGGTTATCTGGATTACACCGAGTTTAAACGTGGCCGAGC  
CACCTATTTAGCGTGCATTATCGCAACCCCAAACCTCATCAGTGGCCCTGTGAAGGTTCCGCGCAATGAGGAAGAAGAGAAGGCGCCAGAGCAAAATTATGAC  
GAAGTCATTAAGGCGCTGAAGGCTGCGGGCATCGATCCTCTTAAACTGGCTGAAGCCCTCTCAGCGATGAAGCCAGAAAATTGA

>pW08291-tetA (MN310376)

ATGACGAGCGAAAATAACAGCTTACTTCTGAACCTTCAGGAAGTTGATAAGACAACCGGCGAAGTTGTTAAGCTGGATGTCAACAGCACCAGTACCGTGCAG  
CCAGTAGCGCTCATGAGACTCGGTCTCTTCGTCCCAACTCTGAAATCAACAGGGAAGAGCAAGGCGAACCGGAAAAACGTTACAGACGCGACTGAGGAGCT  
TGTACAGCTGTCCATTGCCAAAAGCGAAGGGTACACTGACGTTAAGATCACCGGTTTCGCGTCTTGATATGGACACGGATTTTAAAGTCTGGCTGGGGATAATC  
GCTCCATGTTCGGAGTATGGGGTAAAAAGTGACACCTGGAAGTGTGCTTCGTGCAATTCGTTAAGATGTGCGGATTTGACTCCCGTCGTTCAAACAAAAAAT  
GCGCGATCGCATCAGTAATTCCTGTTTAAACTCGCCTCGGTTACGTTGAAGTTCCAGAGCGAGACCAAAGGATGGACCACCCATCTGGTGCAGTCAGCCTATT  
ATGACATCAACGAGGATATCGTTGAGATCAAGGCTGAACCTAAGCTGTTTGAGCTTTACCACATGGACAGAAGGGTACTGCTGCGGCTGAAAGCCATTGACGC  
CCTGCAGCGCAAGGAATCAGCCCAGGCGCTTTATACCTACATCGAAAGTCTTCCCCAGAATCCTGCACCTATTTCCATGAAACGGATGCGTGAGCGGCTGAATC  
TCACCTCAAATGTCTATAACGCAGAACCACACGGTGCGTAAGGCGATGGAGCAGCTGCGGGATATTGGTTATCTGGATTACACCGAGTTTAAACGTGGCCGAGC  
CACCTATTTAGCGTGCATTATCGCAACCCCAAACCTCATCAGTGGCCCTGTGAAGGTTCCGCGCAATGAGGAAGAAGAGAAGGCGCCAGAGCAAAATTATGAC  
GAAGTCATTAAGGCGCTGAAGGCTGCGGGCATCGATCCTCTTAAACTGGCTGAAGCCCTCTCAGCGATGAAGCCAGAAAATTGA

>p71221-mpH (MN310374)

ATGACGAGCGAAAATAACAGCTTACTTCTGAACCTTCAGGAAGTTGATAAGACAACCGGCGAAGTTGTTAAGCTGGATGTCAACAGCACCAGTACCGTGCAG  
CCAGTAGCGCTCATGAGACTCGGTCTCTTCGTCCCAACTCTGAAATCAACAGGGAAGAGCAAGGCGAACCGGAAAAACGTTACAGACGCGACTGAGGAGCT  
TGTACAGCTGTCCATTGCCAAAAGCGAAGGGTACACTGACGTTAAGATCACCGGTTTCGCGTCTTGATATGGACACGGATTTTAAAGTCTGGCTGGGGATAATC  
GCTCCATGTTCGGAGTATGGGGTAAAAAGTGACACCTGGAAGTGTGCTTCGTGCAATTCGTTAAGATGTGCGGATTTGACTCCCGTCGTTCAAACAAAAAAT  
GCGCGATCGCATCAGTAATTCCTGTTTAAACTCGCCTCGGTTACGTTGAAGTTCCAGAGCGAGACCAAAGGATGGACCACCCATCTGGTGCAGTCAGCCTATT  
ATGACATCAACGAGGATATCGTTGAGATCAAGGCTGAACCTAAGCTGTTTGAGCTTTACCACATGGACAGAAGGGTACTGCTGCGGCTGAAAGCCATTGACGC  
CCTGCAGCGCAAGGAATCAGCCCAGGCGCTTTATACCTACATCGAAAGTCTTCCCCAGAATCCTGCACCTATTTCCATGAAACGGATGCGTGAGCGGCTGAATC  
TCACCTCAAATGTCTATAACGCAGAACCACACGGTGCGTAAGGCGATGGAGCAGCTGCGGGATATTGGTTATCTGGATTACACCGAGTTTAAACGTGGCCGAGC  
CACCTATTTAGCGTGCATTATCGCAACCCCAAACCTCATCAGTGGCCCTGTGAAGGTTCCGCGCAATGAGGAAGAAGAGAAGGCGCCAGAGCAAAATTATGAC  
GAAGTCATTAAGGCGCTGAAGGCTGCGGGCATCGATCCTCTTAAACTGGCTGAAGCCCTCTCAGCGATGAAGCCAGAAAATTGA

>pA2359-IMP (MN423363)

ATGACGAGCGAAAATAACAGCTTACCTCTCAATCTTCAGGAAGTGGACAAGACAACCGGCGAAGTTGTTAAGCTGGATGTCAACAGTACCAGTACTGTGCAG  
CCGGTAGCGCTCATGAGGCTCGGTCTCTTCGTTCCAACCTGAAATCAACCTCCAGGAGTAAGGCAAACCGTAAAAACGTACAGATGCCACTGAGGAGCTC  
GTACAGCTGTCCATCGCCAAAAGCGAAGGGTACACCGACGTTAAGATCACCGGTTTCGCGTCTTGATATGGACACGGATTTTAAAGTCTGGCTCGGGATCATTG  
CTCGATGTCTGAGTATGGGGTAAAAAGTGACACTCTGGAGCTGTCGTTTCGTTGAATTCGTTAAGATGTGTGGATTTGACTCACGGCGCTCAAACAAGAAAATG  
CGGGATCGCATCAGCAATTCCCTGTTTAAACTCGCCTCGGTTACCCTGAAGTTCAGAGCGAGACCAAAGGATGGACCACCCATCTGGTGCAGTCAGCCTATTA  
TGACATCAACGAGGATATCGTGGAGATCAAGGCTGAACCCAAGCTCTTTGAGCTTTACCATATGGACAGGCGGGTCTGCTTCGGCTGAAAGCCATTGACGCC  
CTGCAGCGGAAGGAATCTGCCCAGGCGCTGTATACCTACATCGAGAGCCTTCCCCAGAATCCCGCACCTATCTCCATGAAACGTATGCGGGACCGGCTGAATCT  
TACCTCAAATGTCTATACGCAGAACCACACGGTCCGAAAGGCTATGGAGCAACTTCGGGATATCGGCTATCTGGATTACACCGAGTTTAAACGTGGCCGGGCG  
ACTTACTTTAGCGTTCATTATCGCAATCCCAAACCTCATCAGCGGGACGGTGAAGGTACCGCGCAAGGAGGAAGAAGAGAAGGCGCCGGAGCAGAATTATGAC  
GAAGTCATCAAGGCACTGAAGGCTGCAGGCATCGATCCGCAGAACTTGCTGAAGCGCTATCGGCGATGAAGCCGAAAATTGA

>p13294-1NR (MT570100)

ATGACGAGCGAAAATAACAGCTTACCTCTCAATCTTCAGGAAGTGGACAAGACAACCGGCGAAGTTGTTAAGCTGGATGTCAACAGTACCAGTACTGTGCAG  
CCGGTAGCGCTCATGAGGCTCGGTCTCTTCGTTCCAACCTGAAATCAACCTCCAGGAGTAAGGCAAACCGTAAAAACGTACAGATGCCACTGAGGAGCTC  
GTACAGCTGTCCATCGCCAAAAGCGAAGGGTACACCGACGTTAAGATCACCGGTTTCGCGTCTTGATATGGACACGGATTTTAAAGTCTGGCTCGGGATCATTG  
CTCGATGTCTGAGTATGGGGTAAAAAGTGACACTCTGGAGCTGTCGTTTCGTTGAATTCGTTAAGATGTGTGGATTTGACTCACGGCGCTCAAACAAGAAAATG  
CGGGATCGCATCAGCAATTCCCTGTTTAAACTCGCCTCGGTTACCCTGAAGTTCAGAGCGAGACCAAAGGATGGACCACCCATCTGGTGCAGTCAGCCTATTA  
TGACATCAACGAGGATATCGTGGAGATCAAGGCTGAACCCAAGCTCTTTGAGCTTTACCATATGGACAGGCGGGTCTGCTTCGGCTGAAAGCCATTGACGCC  
CTGCAGCGGAAGGAATCTGCCCAGGCGCTGTATACCTACATCGAGAGCCTTCCCCAGAATCCCGCACCTATCTCCATGAAACGTATGCGGGACCGGCTGAATCT  
TACCTCAAATGTCTATACGCAGAACCACACGGTCCGAAAGGCTATGGAGCAACTTCGGGATATCGGCTATCTGGATTACACCGAGTTTAAACGTGGCCGGGCG  
ACTTACTTTAGCGTTCATTATCGCAATCCCAAACCTCATCAGCGGGACGGTGAAGGTACCGCGCAAGGAGGAAGAAGAGAAGGCGCCGGAGCAGAATTATGAC  
GAAGTCATCAAGGCACTGAAGGCTGCAGGCATCGATCCGCAGAACTTGCTGAAGCGCTATCGGCGATGAAGCCGAAAATTGA

>pA1876-NR (MT549899)

ATGACGAGCGAAAATAACAGCTTACCTCTCAATCTTCAGGAAGTGGACAAGACAACCGGCGAAGTTGTTAAGCTGGATGTCAACAGTACCAGTACTGTGCAG  
CCGGTAGCGCTCATGAGGCTCGGTCTCTTCGTTCCAACCTGAAATCAACCTCCAGGAGTAAGGCAAACCGTAAAAACGTACAGATGCCACTGAGGAGCTC  
GTACAGCTGTCCATCGCCAAAAGCGAAGGGTACACCGACGTTAAGATCACCGGTTTCGCGTCTTGATATGGACACGGATTTTAAAGTCTGGCTCGGGATCATTG  
CTCGATGTCTGAGTATGGGGTAAAAAGTGACACTCTGGAGCTGTCGTTTCGTTGAATTCGTTAAGATGTGTGGATTTGACTCACGGCGCTCAAACAAGAAAATG



CGGGATCGCATCAGCAATTCCCTGTTTAAACTCGCCTCGGTTACCCTGAAGTTCCAGAGCGAGACCAAAGGATGGACCACCCATCTGGTGCAGTCAGCCTATTA  
TGACATCAACGAGGATATCGTGGAGATCAAGGCTGAACCCAAGCTCTTTGAGCTTTACCATATGGACAGGCGGGTCTGCTTCGGCTGAAAGCCATTGACGCC  
CTGCAGCGGAAGGAATCTGCCAGGCGCTGTATACCTACATCGAGAGCCTTCCCCAGAATCCCGCACCTATCTCCATGAAACGTATGCGGGACCGGCTGAATCT  
TACCTCAAATGTCTATACGCAGAACCACACGGTCCGAAAGGCTATGGAGCAACTTCGGGATATCGGCTATCTGGATTACACCGAGTTTAAACGTGGCCGGGCG  
ACTTACTTTAGCGTTCATTATCGCAATCCCAAACCTCATCAGCGGGACGGTGAAGGTACCGCGCAAGGAGGAAGAAGAGAAGGCGCCGGAGCAGAATTATGAC  
GAAGTCATCAAGGCACTGAAGGCTGCAGGCATCGATCCGCAGAACTTGCTGAAGCGCTATCGGCGATGAAGCCGAAAATTGA

>pFB2.3 (CP014778)

ATGACGAACGAAAATAACAGCTTACCTCTCAATCTTCAGGAAGTGGACAAGACAACCGGCGAAGTTGTTAAGCTGGATGTCAACAGTACCAGTACTGTGCAG  
CCGGTAGCGCTCATGAGGCTCGGTCTCTTCGTTCCAACCTGAAATCAACCTCCAGGAGTAAGGCAAACCGTAAAAACGTACAGATGCCACTGAGGAGCTC  
GTACAGCTGTCCATCGCCAAAAGCGAAGGGTACACCGACGTTAAGATCACCGGTTTCGCGTCTTGATATGGACACGGATTTTAAAGTCTGGCTCGGGATCATTCC  
CTCGATGTCTGAGTATGGGGTAAAAAGTGACACTCTGGAGCTGTCGTTTCGTTGAATTCGTTAAGATGTGTGGATTTGACTCACGGCGCTCAAACAAGAAAATG  
CGGGATCGCATCAGCAATTCCCTGTTTAAACTCGCCTCGGTTACCCTGAAGTTCCAGAGCGAGACCAAAGGATGGACCACCCATCTGGTGCAGTCAGCCTATTA  
TGACATCAACGAGGATATCGTGGAGATCAAGGCTGAACCCAAGCTCTTTGAGCTTTACCATATGGACAGGCGGGTCTGCTTCGGCTGAAAGCCATTGACGCC  
CTGCAGCGGAAGGAATCTGCCAGGCGCTGTATACCTACATCGAGAGCCTTCCCCAGAATCCCGCACCTATCTCCATGAAACGTATGCGGGACCGGCTGAATCT  
TACCTCAAATGTCTATACGCAGAACCACACGGTCCGAAAGGCTATGGAGCAACTTCGGGATATCGGCTATCTGGATTACACCGAGTTTAAACGTGGCCGGGCG  
ACTTACTTTAGCGTTCATTATCGCAATCCCAAACCTCATCAGCGGGACGGTGAAGGTACCGCGCAAGGAGGAAGAAGAGAAGGCGCCGGAGCAGAATTATGAC  
GAAGTCATCAAGGCACTGAAGGCTGCAGGCATCGATCCGCAGAACTTGCTGAAGCGCTATCGGCGATGAAGCCGAAAATTGA

>p10057-catA (MN423364)

ATGACGAGCGAAAATAACAGCTTACCTCTCAATCTTCAGGAAGTGGACAAGACAACCGGCGAAGTTGTTAAGCTGGATGTCAACAGTACCAGTACTGTGCAG  
CCGGTAGCGCTCATGAGGCTCGGTCTCTTCGTTCCAACCTGAAATCAACCTCCAGGAGTAAGGCAAACCGTAAAAACGTACAGATGCCACTGAGGAGCTC  
GTACAGCTGTCCATCGCCAAAAGCGAAGGGTACACCGACGTTAAGATCACCGGTTTCGCGTCTTGATATGGACACGGATTTTAAAGTCTGGCTCGGGATCATTCC  
CTCGATGTCTGAGTATGGGGTAAAAAGTGACACTCTGGAAGTGTGTCGTTTCGTTGAATTCGTTAAGATGTGTGGATTTGACTCACGGCGCTCAAACAAGAAAATG  
CGGGATCGCATCAGCAATTCCCTGTTTAAACTCGCCTCGGTTACCCTGAAGTTCCAGAGCGAGACCAAAGGATGGACCACCCATCTGGTGCAGTCAGCCTATTA  
TGACATCAACGAGGATATCGTGGAGATCAAGGCTGAACCCAAGCTCTTTGAGCTTTACCATATGGACAGGCGGGTCTGCTTCGGCTGAAAGCCATTGACGCC  
CTGCAGCGGAAGGAATCTGCCAGGCGCTGTATACCTACATCGAGAGCCTTCCCCAGAATCCCGCACCTATCTCCATGAAACGTATGCGGGACCGGCTGAATCT  
TACCTCAAATGTCTATACGCAGAACCACACGGTCCGAAAGGCTATGGAGCAACTTCGGGATATCGGCTATCTGGATTACACCGAGTTTAAACGTGGCCGGGCG

ACTTACTTTAGCGTTCATTATCGCAATCCCAAACCTCATCAGCGGGACGGTGAAGGTACCGCGCAAGGAGGAAGAAGAGAAGGCGCCGGAGCAGAATTATGAC  
GAAGTCATCAAGGCACTGAAGGCTGCAGGCATCGATCCGCAGAACTTGCTGAAGCGCTATCGGCGATGAAGCCGAAAATTGA

>pCP051549 (CP051549)

ATGATGAGCGAAAATAATACCTTACCTCTAAATTTGCAGGAGGTTGATAAGAGAACCGGTGAAGTTGTTAAGCTAGATGTAAACAGCACCAGTACCGTTCAACC  
TGTTGCGCTCATGAGGCTTGGTCTCTTCGTTCTTACACTGAAATCGACAGGAAAGAGTAAGGCTAACTGTAAAAATGTCACAGATGCGACCGAGGAGCTTGTA  
CAGCTGTCTATCGCGAAGAGCGAGGGGTATACCGATGTCAGGATCACAGGATCGCGTCTGGACATGGATACGGACTTTAAAGTCTGGCTTGGGATCATTGCTC  
CATGTCAGAGTATGGCGTAATAAAAGACACGCTAGAATTGTCTTTTGTGAGTTCGTTAAAAATGTGTGGTTTTGATTTCGCGGGCGTTCAAATAAGAAAATGCGCG  
ACCGTATCAGCAACTCTCTGTTCAAACCTGGCGACCGTTACGTTGAAGTTCAGAGTGACACTAAAGGCTGGACTACACACTTGGTGCAGTCAGCTTACTATGAT  
ATCAACGAAGATATCGTGGAGATCAAGGCAGAACCCAAACTCTTCGAGCTCTACCACATGGACCGGCGGGTACTGCTGCGGTTGAAGGCAATCGACGCCCTG  
CAGCGTAAAGAGTCTGCTCAAGCCTTGATACCTACATCGAAAGCCTGCCTCAGAACCCGGCGCCAATCTCAATGAAACGTATGCGGGACCGGTTGAACCTCA  
CCTCAAACGTGTACACGCAGAACCATAACCGTTCGCAAAGCAATGGAGCAGTTGCGAGATATCGGGTATCTGGATTACACCGAATTCAAACGCGGACGGGCAAC  
CTATTTACAGCGTGCATTATCGCAACCCGAAATTAATTAGCAGTACCGTGAAGTCGCCTCGCAAAGAGGTAGAGGAGCAGTCTCCCGAGCAGAACTATGATGAG  
GTCATTAAGGCTTTGAAAGCCGCGGGTATCGATCCTCAAAGCTGGCCGAAGCGCTCACCAGTATTAAGCCAGAAAATTGA

>pAF18\_1 (CP025983)

ATGACGAGCGAAAATAATACCTTACCTCTAAATTTGCAGGAGGTTGATAAGAAAACCGGTGAAGTTGTTAAGCTAGATGTAAACAGCACCAGTACCGTTCAAC  
CTGTTGCGCTCATGAGGCTTGGTCTCTTCGTTCTTACGCTGAAATCGACAGGAAAGAGTAAGGCTAACTGTAAAAATGTCACAGATGCGTCCGAGGAGCTTGT  
ACAGCTGTCTATCGCGAAGAGCGAGGGGTACACCGATGTCAGGATCACAGGATCGCGTCTGGACATGGATACGGACTTTAAAGTCTGGCTTGGGATCATTGCG  
TCCATGTCAGAGTATGGCGTAAAAAAGACACGCTGGAATTGTCTTTTGTGAGTTCGTTAAAAATGTGTGGTTTTGATTTCGCGGGCGTTCAAATAAGAAAATGCG  
CGACCGTATCAGCAACTCTCTGTTCAAACCTGGCGACCGTTACGTTGAAGTTCAGAGTGACACTAAAGGCTGGACTACACACTTGGTGCAGTCAGCTTACTAT  
GATATCAACGAAGATATCGTGGAGATCAAGGCAGAACCCAAACTCTTCGAGCTCTACCACATGGACCGGCGGGTACTGCTGCGGTTGAAGGCAATCGACGCCC  
TGCAGCGTAAAGAGTCTGCTCAAGCCTTGATACCTACATCGAAAGCCTGCCTCAGAACCCGGCGCCAATCTCAATGAAACGTATGCGGGACCGGTTGAACCT  
CACCTCAAACGTGTACACGCAGAACCATAACCGTTCGCAAAGCAATGGAGCAGTTGCGAAATATCGGGTATCTGGATTACACCGAATTCAAACGCGGACGGGCA  
ACCTATTTACAGCGTGCATTATCGCAACCCGAAATTAATTAGCAGTACCGTGAAGTCGCCTCGCAAAGAGGTAGAGGAGCAGTCTCCCGAGCAGAACTATGATG  
AGGTCATTAAGGCTTTGAAAGCCGCGGGTATCGATCCGCAAAGCTGGCCGAAGCGCTCACCAGTATTAAGCCAGAAAATTGA

>p1\_090001 (CP036176)

ATGACGAGCGAAAATAATAGCTTACCTCTGAATCTGCAGGAGGTTGATAAGAAAACCGGTGAAGTTGTTAAGCTGGATGTAAACAGCACCAGTACCGTTCAAC

CCGTTGCGCTCATGAGGCTTGGTCTCTTTGTTCCCTACGCTGAAATCGACAGGAAGGAGTAAGGCTAACCGTAAAAACGTACACAGATGCGACTGAGGAGCTTGT  
ACAGCTGTCTATCGCGAAGAGTGAAGGGTACACCGACGTCAGGATCACAGGATCGCGTCTGGACATGGACACGGACTTTAAAGTCTGGCTTGGGATCATTGCG  
TCCATGTCAGAGTATGGCGTAAAAAAGACACGCTAGAATTGTCTTTTGTGAGTTCGTTAAGATGTGTGGTTTTGATTTCGCGGCGTTCAAACAAAAAATGCG  
CGACCGTATCAGCAACTCCCTGTTCAAACCTGGCGACCGTCACGTTGAAGTTCCAGAATGACACCAAGGGCTGGACCACACACCTGGTGCAGTCGGCTTACTAT  
GATATCAACGAAGATATCGTGGAAATCAAGGCCGAGCCCAAACCTCTTCGAGCTCTACCACATGGACCGGCGGGTGTCTGCTGCGGTTGAAGGCGATCGACGCC  
TGCAGCGTAAAGAGTCTGCTCAAGCCCTGTATACCTACATCGAAAGCCTGCCTCAGAACCTGGCGCCAATCTCCATGAAACGTATGCGCGATCGGCTGAATCTT  
ACCTCAAACGTGTACACGCAGAACCATAACCGTTTCGCAAAGCGATGGAGCAACTGCGGGATATTGGATATCTGGATTACACCGAATTCAAACGCGGACGGGCAG  
CCTATTTTCAGCGTGCATTATCGCAACCCGAAACTGATCAGCAGTACTGTGAAGTCGCTCGCAAAGAGGAAGAGGCGCAGTCTCCTGAGCAGAACTATGATGA  
GGTCATTAAGGCTTTGAAAGCCGCGGGTATCGATCCTCAGAAGCTGGCCGAAGCGCTCACCAGTATGAAGCCTGAAAATTGA

>pCP029140 (CP029140)

ATGACGAGTGAAAATAATGACTTACCTCTGAATCTGCTGGAGGTAGATAAAACAACCTGGTGAGGTTGTTAAGCTGGATGTCAACAGCACCAGTACTGTTTCAGC  
CTGTAGCGCTCATGAGGCTCGGTCTCTTCGTTCCACCCTCAAATCAACCAGTAAGAGTAAGGGCAACCGCAAAAACGTACACAGACGCGACTGAGGAGCTTG  
TACAGCTGTCTATCGCTAAGAGTGAGGGGTATACCGACGTTAGGATCACTGGATCGCGTCTCGACATGGACACAGATTTCAAAGTCTGGCTTGGGATCGTTGCG  
TCTATGTCAGAGTATGGCGTAAAAAAGACACCCTGGAATTGTCTTTTGTAGAGTTCGTGAAGATGTGTGGCTTTGACTCGCGCCGTTCGAACAAGAAAATGC  
GCGATCGTATCAGTAACTCCCTCTTCAAACCTGGCGACCGTCACGCTGAAGTTCCAGAGTGAAACCAAGGGCTGGACTACACACCTGGTACAGTCGGCTTACTA  
TGATATCAATGAAGATATCGTGGAGATCAAGGCTGAGCCTAACTTTTCGAGCTCTATCATATGGACCGGCGGGTACTGCTGCGGTTGAAGGCAATCGATGCTC  
TGCAACGTAAAGAGTCCGCGCAAGCCTTGTATACCTACATCGAAAGTTTACCTCAGAACCCGGCGCCAATCTCCATGAAACGTATGCGGGACCGGCTGAATCTT  
ACCTCAAATGTCTATACGCAGAACCACACCGTTTCGTAAGGCAATGGAGCAGTTGCGGGATATCGGTTATCTGGACTACACGGAGTTCAAGCGCGGCCGTGCAA  
CCTATTTTCAGTGTGCATTATCGCAATCCTAAGCTCATCAGTAGCAACGTAAAAGTGCCGCGTAAAGAGGAAGAAGAGAAGGCACCTGAGCAAAACTACGATGA  
GGTCATAAAAGCGCTGAAAGCTGCGGGGATTGATCCACAGAAGCTTGCCGAAGCCCTGTGCGGCGATGAAACCAGAAAATTGA

>pRHBSTW-00529\_3 (CP056420)

ATGACGAGTGAAAATAATGACTTACCTCTGAATCTGCTGGAGGTAGATAAAACAACCTGGTGAGGTTGTTAAGCTGGATGTCAACAGCACCAGTACTGTTTCAGC  
CTGTAGCGCTCATGAGGCTCGGTCTCTTCGTTCCACCCTCAAATCAACCAGTAAGAGTAAGGGCAACCGCAAAAACGTACACAGACGCGACTGAGGAGCTTG  
TACAGCTGTCTATCGCTAAGAGTGAGGGGTATACCGACGTTAGGATCACTGGATCGCGTCTCGACATGGACACAGATTTCAAAGTCTGGCTTGGGATCGTTGCG  
TCTATGTCAGAGTATGGCGTAAAAAAGACACCCTGGAATTGTCTTTTGTAGAGTTCGTGAAGATGTGTGGCTTTGACTCGCGCCGTTCGAACAAGAAAATGC  
GCGATCGTATCAGTAACTCCCTCTTCAAACCTGGCGACCGTCACGCTGAAGTTCCAGAGTGAAACCAAGGGCTGGACTACACACCTGGTACAGTCGGCTTACTA

TGATATCAATGAAGATATCGTGGAGATCAAGGCTGAGCCTAAACTTTTCGAGCTCTATCATATGGACCGGCGGGTACTGCTGCGGTTGAAGGCAATCGATGCTC  
TGCAACGTAAAGAGTCCGCGCAAGCCTTGTATACCTACATCGAAAGTTTACCTCAGAACCCGCGCCAATCTCCATGAAACGTATGCGGGACCGGCTGAATCTT  
ACCTCAAATGTCTATACGCAGAACCACACCGTTCGTAAGGCAATGGAGCAGTTGCGGGATATCGGTTATCTGGACTACACGGAGTTCAAGCGCGGCCGTGCAA  
CCTATTTTCAGTGTGCATTATCGCAATCCTAAGCTCATCAGTAGCAACGTAAAAGTGCCGCGTAAAGAGGAAGAAGAGAAGGCACCTGAGCAAAACTACGATGA  
GGTCATAAAAGCGCTGAAAGCTGCGGGGATTGATCCACAGAAGCTTGCCGAAGCCCTGTCGGCGATGAAACCAGAAAATTGA

>pN55391 (CP016411)

ATGACGAGTGAAAATAATAAGTTACCTCTGAATCTGCAGGAAGTGGATAAGACAACCTGGTGAAGTTGTTAAGTTGGATGTCAACAGTACAAGTACCGTGCAGC  
CAGTAGCCCTCATGCGACTCGGGCTGTTTCGTTCCACGTTGAAATCGACAGGGAAGAGCAAGGCGAACCCTAAAAACGTCACAGACGCGACTGAGGAGCTT  
GTACAGCTGTCTATCGCCAAGAGTGAAGGGTATACGGATGTTAGGATCACAGGATCGCGTCTTGACATGGATACAGACTTTAAGGTCTGGCTCGGGATCATTCCG  
TTCCATGTCAGAGTATGGTGTAAGGACACTCTGGAAGTGCCTTTGTTGAGTTTGTAAATGTGTGGTTTTGATTCCCGGCGTTCCAACAAGAAAATGC  
GCGATCGCATCAGTAATTCCTTATTCAAACCTGGCTTCGGTGACGTTGCAGTTCCAGAGTGAAACCAAAGGCTGGACAACCCATCTTGTTTCAGTCGGCATTCTAT  
GACATTAACGAAGATATTGTTGAGATTAAGGCGGAGCCTAAGCTGTTTCGAGCTGTATCATATGGACAGAAGAGTTCTTCTTCGTCTGAAGGCTATTGATGCACT  
CCAGAGAAAAGAATCTGCACAAGCGCTGTATACCTACATAGAGAGTCTTCCGCAGAATCCGGCACCTATCTCAATGAAGCGTATGCGGGACAGACTGAACCTC  
ACATCCAATGTCTATACGCAGAACCACACGGTCCGTAAGGCGATGGAGCAACTCAGGGATATCGGTTATCTGGACTACACAGAATTTAAGCGCGGACGAGCAA  
CCTACTTCAGCGTTCATTATCGCAATCCTAAGCTCATCAGCAGTACTGTTAAAACACCGCGAAAGGACAAAAGTGGAAGGAACCGGAGCAGAATTACGATGA  
AGTAATCAAGGCCCTGGAAGCTGCCGGTATTGATCCTAAAAAACTAGCTGAAGCTCTCACCAGTATGAACCCCAAACATTGA

>pAUSMDU00010532\_01 (CP045959)

ATGACGAGTGAACATAATAAGTTACCTCTGAATCTGCAGGAAGTGGATAAGACAACCTGGTGAAGTTGTTAAGTTGGATGTCAACAGTACAAGTACCGTGCAGC  
CAGTAGCCCTCATGCGACTTGGGCTGTTTCGTTCCACGTTGAAATCGACAGGGAAGAGCAAGGCGAACCCTAAAAACGTCACAGACGCGACTGAGGAGCTTA  
TACAGCTGTCTATCGCCAAGAGTGAAGGGTATACGGATGTTAGGATCACAGGATCGCGTCTTGACATGGATACGGACTTTAAGGTCTGGCTCGGGATCATTTCG  
TCCATGTCAGAGTATGGTGTAAGGACACTCTGGAAGTGCCTTTGTTGAGTTCGTTAAGATGTGTGGTTTTGATTCCCGGCGTTCCAACAAGAAAATGC  
CGATCGCATCAGTAATTCCTTATTCAAGTTGGCTTCGGTGACGTTGCAGTTCCAGAGTGAAACCAAAGGCTGGACAACCCATCTTGTTTCAGTCGGCATTCTATG  
ACATTAACGAAGATATTGTTGAGATTAAGGCGGAGCCTAAGCTGTTTCGAGCTGTATCATATGGACAGAAGAGTTCTTCTTCGTCTGAAGGCTATTGATGCACTCC  
AGAGAAAAGAATCTGCACAGGCGCTGTATACCTACATAGAGAGTCTTCCGCAGAATCCGGCACCTATATCAATGAAGCGTATGCGGGACAGACTGAACCTCAC  
ATCCAATGTCTATACGCAGAACCACACGGTCCGTAAGGCGATGGAGCAACTCAGAGATATCGGTTATCTGGACTACACAGAATTTAAGCGCGGACGAGCAACC  
TACTTCAGCGTTCATTATCGCAATCCTAAGCTCATCAGCAGTACTGTTAAAACACCGCGAAAGGACAAAAGTGGAAGGAACCGGAGCAGAATTACGATGAA

GTAATCAAGGCTCTGGAAGCTGCCGGTATTGATCCTAAAAAACTAGCTGAAGCTCTCACCAGTATTAACCCCAAACATTGA

>pCP022140 (CP022140)

ATGACGAGTGAAAATAATAAGTTACCTCTGAATCTGCAGGAAGTGGATAAGACAACCTGGTGAAGTTGTTAAGTTGGATGTCAACAGTACAAGTACCGTGCAGC  
CAGTAGCCCTCATGCGACTCGGACTGTTTCGTTCCACGTTGAAATCGACAGGGAAGAGCAAGGCCAACCCTAAAAACGTCACAGACGCGACTGAGGAGCTT  
GTACAGCTGTCTATCGCCAAGAGTGAAGGGTATACGGATGTTAGGATCACAGGATCGCGTCTTGACATGGATACGGACTTTAAGGTCTGGCTCGGGATCATTCCG  
TTCCATGTCAGAGTATGGTGTCAAAAAGGACACTCTGGAAGTGCCTTTGTTGAGTTCGTTAAGATGTGTGGTTTCGATTCCCAGGCTTCCAACAAGAAAATGC  
GCGATCGCATCAGTAATTCCTTATTCAAGCTGGCTTCGGTGACGTTGCAGTTCCAGAGTGAAACCAAAGGCTGGACAACCCATCTTGTTTCAGTCGGCATTCTAT  
GACATTAACGAAGATATTGTTGAGATTAAGGCGGAGCCTAAGCTGTTTCGAGCTGTATCATATGGACAGAAGAGTTCTTCTTCGTCTGAAGGCTATTGATGCACT  
CCAGAGAAAAGAATCTGCGCAGGCGCTGTATACCTACATAGAGAGCCTTCCGCAGAATCCGGCACCTATCTCGATGAAGCGTATGCGGGACAGACTGAACCTT  
ACATCTAATGTCTATACGCAGAACCACACGGTCCGTAAGGCGATGGAGCAGCTCAGGGATATCGGTTATCTGGACTACACCGAATTTAAGCGCGGACGAGCAA  
CCTACTTCAGCGTTCATTATCGCAATCCTAAGCTCATCAGCAGTACTGTTAAAACACCGAGAAAGGACAAAAGTGAAAAGGAACCGGAGCAGAATTACGATGA  
AGTAATCAAGGCCCTGGAAGCTGTCGGTATTGATCCTAAAAAACTTGCTGAAGCTCTCACCAGTATGAACCCCAAACATTGA

>pC52\_001 (CP042546)

ATGGCGAGTGAAAATAATAAGTTACCTCTGAATCTGCAGGAAGTGGATAAATCAACCGGAGAAGTTGTCAACCTGGATGTCAACAGCACCAGTACCGTACAGC  
CTGTAGCCCTCATGCGTCTTGGTCTGTTTCGTTCCCTACGCTGAAATCGACAGGAAAGAGTAAGGCCAACCCTAAAAACGTCACAGACGCGACTGAGGAGCTCG  
TACAGCTCTCTATTGCCAAGAGTGAAGGGTATACGGATATCAAATCACAGGATCACGCCTGGATATGGATACTGACTTCAAAGTCTGGCTGGGGATCATTTCGAT  
CCATGTCTGAGTATGGCGTAAAAAAGACTCACTGGAACCTTTCGTTTCGTTGAGTTCGTTCAAGATGTGCGGATTTGACTCCCAGCCTCTAATAAAAAAATGCGT  
GACCGCATCAGCAACTCGCTGTTCAAGCTCGCGTCCGGTACCCTGAAGTTTCAGAGCGAGACAAAAGGCTGGACGACGCACCTTGTGCAGTCCGCCTACTAT  
GACATTAACGAAGATATCATTGAGATAAAGGCTGAACCCAAGCTCTTTGAGCTGTATCACATGGACAGAAGGGTGCTACTGCGTCTGAAGGCCATTGATGCCCT  
CCAGAGAAAAGAATCCGCTCAGGCGCTTTATACATACATTGAGAGCCTGCCGCAGAACCCGGTCCCTATCTCCATGAAGCGTATGCGGGACAGGCTGAACCTG  
ACATCAAACGTCTACACGCAGAACCATACTGTCCGTAAAGCGATGGAACAACCTCAAGGATATCGGGTATCTGGATTACACGGAATTCAAACGCGGACGTTCAA  
CTTATTTTCAGCGTTCATTACCGTAATCCGAAGCTAATCAGCAGCTCTGGCAAGGCGGTTCCAGGGATGAGGATGAGAAAAACCTGAACAGAACTACGACGA  
AGTCATTAAGGCCCTGAAAGCGGCCGGGATCGATCCACAAAAGCTGGCCGAAGCCCTCACAACATGAAACCAGAAAATTGA

>pCP026049 (CP026049)

ATGGCGAGTGAAAATAATAAGTTACCTCTGAATCTGCAGGAAGTGGATAAATCAACCGGAGAAGTTGTCAACCTGGATGTCAACAGCACCAGTACCGTACAGC  
CTGTAGCCCTCATGCGTCTTGGTCTGTTTCGTTCCCTACGCTGAAATCGACAGGAAAGAGTAAGGCCAACCCTAAAAACGTCACAGACGCGACTGAGGAGCTCG

TACAGCTCTCTATTGCCAAGAGTGAAGGGTATACGGATATCAAAATCACAGGATCACGCCTGGATATGGATACTGACTTCAAAGTCTGGCTGGGGATCATTGAT  
CCATGTCTGAGTATGGCGTAAAAAAGACTCACTGGAACCTTTCGTTTCGTTGAGTTCGTC AAGATGTGCGGATTTGACTCCCGACGCTCTAATAAAAAAATGCGT  
GACCGCATCAGCAACTCGCTGTTCAAGCTCGCGTCGGTGACCTGAAGTTTCAGAGCGAGACAAAAGGCTGGACGACGCACCTTGTGCAGTCCGCCTACTAT  
GACATTAACGAAGATATCATTGAGATAAAGGCTGAACCCAAGCTCTTTGAGCTGTATCACATGGACAGAAGGGTGCTACTGCGTCTGAAGGCCATTGATGCCCT  
CCAGAGAAAAGAATCCGCTCAGGCGCTTTATACATACATTGAGAGCCTGCCGCAGAACCCGGTCCCTATCTCCATGAAGCGTATGCGGGACAGGCTGAACCTG  
ACATCAAACGTCTACACGCAGAACCATACTGTCCGTAAAGCGATGGAACAACCTCAAGGATATCGGGTATCTGGATTACACGGAATTCAAACGCGGACGTTCAA  
CTTATTTACAGCGTTCATTACCGTAATCCGAAGCTAATCAGCAGCTCTGGCAAGGCGGTTCCCAGGGATGAGGATGAGAAAAACCTGAACAGAACTACGACGA  
AGTCATTAAGGCCCTGAAAGCGGCCGGGATCGATCCACAAAAGCTGGCCGAAGCCCTCACAAACATGAAACCAGAAAATTGA

>pKoxM1A (CP008842)

ATGGCGAGTGAAAATAATAAGTTACCTCTGAATCTGCAGGAAGTTGATAAATCAACCGGAGAAGTTGTCAACCTGGATGTCAACAGCACCAGTACCGTACAGC  
CTGTAGCCCTCATGCGTCTTGGTCTGTTTCGTTTCCTACGCTGAAATCGACAGGAAAGAGTAAGGCCAACCGTAAAAACGTCACAGACGCGACTGAGGAGCTCG  
TACAGCTCTCTATTGCCAAGAGTGAAGGGTATACGGATATCAAAATCACAGGATCACGCCTGGATATGGATACTGACTTCAAAGTCTGGCTGGGGATCATTGAT  
CCATGTCTGAGTATGGCGTAAAAAAGACTCACTGGAACCTTTCGTTTCGTTGAGTTCGTC AAGATGTGCGGATTTGACTCCCGACGCTCTAATAAAAAAATGCGT  
GACCGCATCAGCAACTCGCTGTTCAAGCTCGCGTCGGTGACCTGAAGTTTCAGAGCGAGACAAAAGGCTGGACGACGCACCTTGTGCAGTCCGCCTACTAT  
GACATTAACGAAGATATCATTGAGATAAAGGCTGAACCCAAGCTCTTTGAGCTGTATCACATGGACAGAAGGGTGCTACTGCGTCTGAAGGCCATTGATGCCCT  
CCAGAGAAAAGAATCCGCTCAGGCGCTTTATACATACATTGAGAGCCTGCCGCAGAACCCGGTCCCTATCTCCATGAAGCGTATGCGGGACAGGCTGAACCTG  
ACATCAAACGTCTACACGCAGAACCATACTGTCCGTAAAGCGATGGAACAACCTCAAGGATATCGGGTATCTGGATTACACGGAATTCAAACGCGGACGTTCAA  
CTTATTTACAGCGTTCATTACCGTAATCCGAAGCTAATCAGCAGCTCTGGCAAGGCGGTTCCCAGGGATGAGGATGAGAAAAACCTGAACAGAACTACGACGA  
AGTCATTAAGGCCCTGAAAGCGGCCGGGATCGATCCACAAAAGCTGGCCGAAGCCCTCACAAACATGAAACCAGAAAATTGA

>pENT-1ac (CP017991)

ATGGCTAAGGAAAATAATGAGTTACCTCTGAATCTTGAGGAGGTGAACAAAACAACAGGTGAAGTTGTTAAGCTGGATGTTAACAGCGCCAGTACTGTTGAGC  
CTGTTGCGCTCATGAGGCTTGGTCTCTTCGTTTCCTACGTTAAATCGACGTCCAGGAGCAAGACTAACCGCAAAAACGTCACTGATGCGACTGAGGAGCTCGT  
ACAGCTCTCTATTGCCAAAAGTGAAGGGTATACCGATGTCAGGATCACAGGATCGCGTCTTGACATGGATACGGACTTCAAAGTCTGGCTTGGGATCATTGCTT  
CGATGTCTGAGTGTGGCGTCAAAAATGACACACTTGAATTATCCTTTGTGCAATTTCGTGAAGATGTGTGGTTTTCGATTCCCGCCGCTCAAACCAGAAAATGCGT  
GACCGTATCAGCAATTCAGTGTAACTTGCAGTAAACCTCAAATTTAGAGCGAGACGAAAGGGTGGACAACACACCTGGTACAGTCCGCTTATTACG  
ACATCACCGAGGATGTTGTTGAGATCAAGGCGGAACCTAAACTCTTCGAATTGTATCACATGGACAGGCGGGTCTGTTGCGACTGAAAGCCATCGATGCCCT

GCAGCGCAAGGAGTCTGCTCAGGCACTCTACACCTACATTGAAAGCCTCCCACAGAATCCCGCTCTATTTCCATGAAACGCATGCGGGACAGACTGAACCTG  
ACGTCAAACGTCTATACGCAGAATCACACGGTTCGCAAAGCCATGATGCAGTTGAAGGATATCGGTTATCTGGATTACACCGAATTCAAACGTGGGCGCTCCAC  
ATACTTCAGTGTGCATTATCGCAATTCAAAACCTTATCAGCAGCACGGTGAAAGTTCCGCGCAAGCCAGAAGAAGAAATACCTGAACAGAATTACGATGAAGTG  
ATTAACGCCCTGAAAGCTGCTGGAATTGATCCGCAGAACTGGCAAAGCCCTCGCCAGCGTCAAGCCCCGATAATGACTGA

>pSTN0717-53-2 DNA (AP022500)

ATGGCTAAGGAAAATAATGAGTTACCTCTGAATCTTGAGGAGGTGAACAAAACAACAGGTGAAGTTGTTAAGCTGGATGTTAACAGCGCCAGTACTGTTTCAGC  
CTGTTGCGCTCATGAGGCTTGGTCTCTTCGTTCCCTACGTAAAAATCGACGTCCAGGAGCAAGACTAACCGCAAAAACGTCACTGATGCGACTGAGGAGCTCGT  
ACAGCTCTCTATTGCCAAAAGTGAAGGGTATACCGATGTCAGGATCACAGGATCGCGTCTTGACATGGATACGGACTTCAAAGTCTGGCTTGGGATCATTTCGTT  
CGATGTCTGAGTGTGGCGTCAAAAATGACACACTTGAATTATCCTTTGTGCAATTCGTGAAGATGTGTGGTTTTCGATTCCCGCCGCTCAAACCAGAAAATGCGT  
GACCGGATCAGCAATTCAGTGTAAAACCTTTCGTCAGTAACCCTCAAATTCAGAGCGAGACGAAAGGGTGGACAACACACCTGGTACAGTCCGCTTATTACG  
ACATCACCGAGGATGTTGTTGAGATCAAGGCGGAACCTAAACTCTTCGAATTGTATCACATGGACAGGCGGGTCTGTTGCGACTGAAAGCCATCGATGCCCT  
GCAGCGCAAGGAGTCTGCTCAGGCACTCTACACCTACATTGAAAGCCTCCCACAGAATCCCGCTCTATTTCCATGAAACGCATGCGGGACAGACTGAACCTG  
ACGTCAAACGTCTATACGCAGAATCACACGGTTCGCAAAGCCATGATGCAGTTGAAGGATATCGGTTATCTGGATTACACCGAATTCAAACGTGGGCGCTCCAC  
ATACTTCAGTGTGCATTATCGCAATTCAAAACCTTATCAGCAGCACGGTGAAAGTTCCGCGCAAGCCAGAAGAAGAAATACCTGAACAGAATTACGATGAAGTG  
ATTAACGCCCTGAAAGCTGCTGGAATTGATCCGCAGAACTGGCAAAGCCCTCGCCAGCGTCAAGCCCCGATAATGACTGA

>pENTAS01 (CP003027)

ATGGCTAAGGAAAATAATGAGTTACCTCTGAATCTTGAGGAGGTGAACAAAACAACAGGCGAAGTTGTTAAGCTGGATGTCAACAGCGCCAGTACCGTTCAG  
CCTGTCGCGCTCATGAGGCTTGGTCTCTTCGTTCCCTACGTAAAAATCAACATCCAGGAGCAAGACTAACCGCAAAAACGTCAACAGATGCGACTGAGGAGCTCG  
TACAGCTCTCTATTGCTAAAAGTGAAGGGTATACCGATGTCAGGATCACAGGATCGCGTCTTGATATGGATACGGACTTCAAAGTCTGGCTCGGGATCATTTCGCT  
CGATGTCTGAGTGCAGGGGTGAAAAATGACACACTGGAGTTATCCTTTGTGCAATTCGTGAAGATGTGTGGTTTTCGATTCCCGCCGTTTCAACAAGAAAATGCG  
CGATCGAATCAGTAATTCAGTGTAAAACCTGGCCTCAGTTACCCTCAAATTCAGAGCGAGACGAAAGGGTGGACGACACACCTGGTACAGTCTGCCTATTAC  
GACATAAACGAGGATGTTGTTGAGATCAAGGCTGAGCCTAAGCTCTTCGAGCTGTATCACATGGACAGGCGGGTGTGTTGCGACTGAAAGCCATCGATGCC  
TGCAGCGCAAGGAGTCTGCTCAGGCACTCTACACCTACATTGAAAGCCTCCCACAGAATCCTGCGCCTATTTCCATGAAACGCATGCGGGACAGGCTGAATCT  
GACGTCAAACGTCTATACGCAGAATCACACGGTTCGCAAAGCCATGACACAGCTGAAGGATATCGGTTATCTGGATTACACCGAGTTCAAGCGTGGCCGCTCC  
ACATACTTCAGTGTGCATTATCGTAATTCAAAACCTTATCAGTAGTACGGTGAAAGTTCCGCGCAAGACTGAAGAGGAAACGCCGGAACAGAATTACGATGAGG  
TGATTAACGCCCTGAAAGCCGCGGGTATTGATCCCCAGAACTGGCAAAGGCCCTCGCCAGTGTCAAACCAGATAATGACTGA

>pECLA (CP001919)

ATGGCTATGGAAAATAATGAGTTACCCCTGAATCTTCAGGAGGTCAATAAGACAACGGGTGAAGTTGTTAAGCTGGATGTCAACAGCGCCAGTACTGTTTCAGC  
CTGTTGCGCTCATGAGGCTTGGTCTGTTTCGTTCCCTACCCTCAAATCGACCTCTAGGAGTAAGACGAACCGCAAAAACGTCACGGATGCGACTGAGGAGCTCGT  
ACAGCTGTCCATTGCCCCGAGTGAAGGGTATACCGATGTCAGGATCACCGGATCGCGCCTCGATATGGATACGGACTTCAAAGTCTGGCTTGGAAATCATCCGTT  
CAATGTATGATTTTGGCGTTAAGGATGACACGCTCAAGCTGTCTTTTGTGAGTTTGTAAAATGTGTGGCTTTGACTCCCGGCGCTCTAACAAGAAAATGCGT  
GACAGGATAAGCAACTCCCTGTTCAAGCTGGCATCCGTAACCCTCAAGTTTCAGAGTGAAACGAAAGGGTGGACTACGCACCTGGTTCAGTCTGCCTATTACG  
ACATCACTGCCGATGTCGTGGAGATCAGGGCAGAGCCCAAGCTCTTTGAGCTTTATCAGATGGACAGGCGGGTCTGTTGCGTCTGAAAGCCATTGATGCCCT  
GCAGCGCAAGGAGTCCGCACAGGCACTCTATACCTACATTGAAAGTCTGCCACAGAATCCGGCCCCATCTCCATGAAGCGTATGCGAGACAGACTCAACCTG  
ACGTCTAACCTCTACACGCAGAACCACACGGTGCGCAAAGCCATGGCGCAGCTGAAGGATATCGGCTATCTGGATTACACCGAATTCAAACGCGGCCGGGCCA  
CCTACTTCAGCGTGCATTACCGTAATCCGAAACTCATCAGTAGCAAGGTCGTTGTTCCCCGTGAGCCGGAAGAGGAAGTACCTGAGCAGAACTATGACGAAGT  
TATTAAGCCCTGAAGGCTGCAGGTATTGATCCTCAGAAACTAGCAAAAGCGCTCGCCAGCGTGAAACCGGGAAATGACTGA

>pCP043854 (CP043854)

ATGGCTATGGAAAATAATGAGTTACCCCTGAATCTTCAGGAGGTCAACAAGACAACGGGCGAAGTTGTTAAGCTGGATGTCAACAGCGCCAGTACTGTTTCAGC  
CTGTTGCGCTCATGAGGCTTGGTTTGTTCGTTCCCTACCCTGAAATCAACCTCCAGGAGTAAGACGAACCGCAAAAACGTCACGGATGCGACTGAGGAGCTCGT  
ACAGCTGTCCATTGCCCCGAGTGAAGGGTATACCGATGTCAGGATCACCGGATCGCGCCTCGATATGGATACGGACTTCAAAGTCTGGCTTGGGATCATCCGTT  
CAATGTATGATTTTGGCGTCAAGGACGACACGCTCAAGCTGTCTTTTGTGAGTTCGTTAAAATGTGTGGTTTTGACTCCCGGCGCTCTAACAAGAAAATGCGC  
GACAGGATCAGCAACTCCCTGTTCAAGCTGGCATCCGTAACCCTCAAGTTTCAGAGTGAAACGAAAGGGTGGACTACGCACTTGGTTCAGTCAGCCTATTACG  
ACATCACTGCCGATGTTGTGGAGATCAGGGCAGAGCCCAAGCTCTTTGAGCTTTATCAAATGGACAGGCGGGTCTGTTGCGTCTGAAGGCCATCGATGCCCT  
GCAGCGCAAGGAATCCGCACAGGCACTCTATACCTACATCGAAAGCCTGCCACAGAATCCGGCCCCATCTCCATGAAGCGTATGCGAGACAGACTCAACCTA  
ACATCTAACCTCTACACGCAGAACCACACGGTGCGCAAAGCCATGGCGCAGCTGAAGGATATCGGCTATCTGGATTACTGAATTCAAACGCGGCCGGGCCA  
CCTACTTCAGCGTGCATTACCGTAATCCTAAACTCATTAGTAGCAAGGTCGTTGTTCCCCGTGAGCCGGAAGAGGAAGTACCTGAGCAGAACTATGACGAAGT  
GATTAAGCCCTGAAGGCTGCAGGTATTGATCCTCAGAAACTGGCAAAGCGCTCGCCAGCGTGAAACCGGAAAATGACTGA

>pLS999207 (LS999207)

ATGGCTATGGAAAATAATGAGTTACCCCTGAATCTTCAGGAGGTCAACAAGACAACGGGCGAAGTTGTTAAGCTGGATGTCAACAGCGCCAGTACTGTTTCAGC  
CTGTTGCACTCATGAGGCTTGGTCTGTTTCGTTCCCTACACTGAAATCGACTTCCAGGAGTAAGGCGAACCGCAAAAACGTCACGGATGCGACTGAGGAGCTCGT  
ACAGTTGTCCATTGCCCCGAGTGAAGGGTATACCGATGTCAGGATCACCGGATCGCGCCTCGATATGGATACGGACTTCAAAGTCTGGCTTGGGATCATTTCGTT



CAATGTATGATTTTGGCGTCAAGGATGACACGCTCAAACCTGTCTTTTGTGAGTTCGTAAAAATGTGTGGCTTTGACTCCCGGCGCTCTAACAAAGAAAATGCGC  
GACAGGATCAGCAACTCCCTGTTCAAGCTGGCATCCGTAACCCTCAAGTTTCAGAGTGAAACGAAAGGGTGGACTACGCACCTAGTTCAGTCTGCCTATTACG  
ACATCACTGCTGATGTTGTGGAGATCAGGGCAGAGCCCAAGCTTTTGTGAGCTTTATCAGATGGACAGGCGGGTCTGTTGCGTCTGAAGGCCATCGATGCACT  
GCAGCGCAAGGAGTCCGCACAGGCACTCTATACCTACATCGAAAGCCTGCCACAGAATCCGGCCCCAATCTCCTTGAAGCGTATGCGAGACAGACTCAACCT  
GACGTCTAACCTCTACACGCAGAACCACACGGTGCACAAAGCCATGGCGCAGTTGAAGGATATCGGCTATCTGGATTACACCGAATTCAAACGCGGCCGGGCC  
ACCTACTTCAGCGTGCATTATCGTAATCCGAAACTCATCAGTAGCAAGGTCGTTGTTCCCCGTGAGCCGGAAGAGGAAGTACCTGAGCAGAACTATGACGAAG  
TGATTAAGCCCTGAAGGCTGCAGGTATTGATCCACAGAAACTGGCAAAAGCGCTCGGCAGCGTGAAGCCGGAAAATGACTGA

>pRHBSTW-00938\_2 (CP055905)

ATGACCTATGAAAATAACAAGTTACCTCTCAATCTTGAGGAAGTAGATAAACTACTGGTGAAGTTGTTAAACTCGATGTCAACAGTACAAGTACCGTTCAGCC  
GGTAGCGTTAATGAGACTGGGTCTCTTTGTTCCAACGTTGAAATCTACGGGAAGGAGCAAAGCTAACCGTAAAAACGTTACAGACGCGACTGAGGAGCTTATA  
CAGCTATCGATTGCCAGGAGCGAAGGCTATACAGACGTTAAGATTACAGGATCCCGTTTAGACATGGATACTGATTTTAAGGTATGGCTTGGCATCATTAGATCG  
ATGTCTGAGTATGGCGTCAAGAAAGATACTTTAGAGCTTTTCATTGTTGAGTTCGTCAAGATGTGCGGATTCAATTCAAGGCGCTCTAATCAGAAAATGCGTGA  
TCGAATCAGTAATCACTCTTCAAACCTTGCTTCGGTGACACTTAAATTTCAAAGTGAAACAAAAGGATGGACTACCCACCTTGTTCACTGCTTTTTATGACAT  
CACTGAAGACGTCATAGAAATTAAGCCGAGCCAAAGCTCTTTGAACTGTACCACATGGACCGACGCGTTCTGCTTCGTCTGAAGGCTATTGACGCACTTCAG  
CGTAAAGAGTCTGCACAAGCGCTGTATACCTTCATCGAAAGTCTGCCACAAAACCCTGCACCTATCTCGATGAAACGCATGAGAGACCGGCTAAATCTCACAT  
CTAACGTTTACACGCAAAACCATACTGTGCGAAAAGCGATGGAGCAACTGAAGGATATTGGCTATCTCGATTACTCGGAGTTTAAACGAGGTCGTTCTACTTAC  
TTCAGTGTTCACTATCGCAATCCTAAGCTTATTAGCAGCTCCGGGAAGGTTAGCAAGGCGGTGGAAGAAGAATCTTGCGCCGAAACTGAACAGAATTATGAGG  
ATGTGATCAAAGCATTGAAAATTGCAGGTATTGATCCTGCTAAGCTTGCTGATGTTCTGGCAAAAATGAAATCTGAAAATTGA

>pCP017663 (CP017663)

ATGGTTAAGAAATCCAAAACCTTACCGATGAATTTGGAAGAAACTAACAAATCGACAGGTGAGATCGTTTCACTGGATATTAACAGCTCCAGCACTGTTTCAGC  
CGGTGCCGCTTATGCGTCTCGGCCTGTTTGTTCCTACTTAAAATCAACGAGTAAGAGCAAAAATAACCGTAAAAATATCACAGATGCCACTGAAGAACTTGTC  
CAGTTGTCCATTGCCAAGAGCGAAGGTTATACCGACGTGAAAATTACAGGGTCACGTTTGGATAATGGACACTGATTTAAGGTGTGGCTGGGGATCGTTCGGTC  
AATGGCAGAGTATGGGGTGCAAGGAAGCGCGCTTAACTTACATTTGTCGAGTTCATTAAGATGTGTGGATTCGATAGCCGGCGCTCCAATCAGAAGATGCCA  
GATCGTATCAGTAACTCCCTGTTTAAAGCTGGCATCCGTCACACTCAAGTTCCAGAACGATACGAAAGGGTGGGTAACACACCTCGTAAAATCAGCCTCATATGA  
TGTCGTAGAAAACGTTGTAGAGATTGAAGCTGAGCCTAACTCTTCGAACTCTATGACATGGACAGGCGTGTGCTGCTTCGATTAAGCCATCGATGCACTG  
CCACGCAAAGAATCAGCCAGGCTCTCTACACCTTATTGAGAGCCTGCCCCAGAACCACGCACCCATTTCCATGAAGCGTCTTCGTGACCGGCTTAACCTGA

CTTCAAGCGTTTACACGCAAAATCACACCGTTAGAAAAGGCCATGGAGCAACTGAAAGAAATCGGGTACCTCGAATACACCGAAACTAAACGCGGAAACTCCA  
CCTTCTTCGTCGTTCACTACCGCAATCCGAAGCTGATCCAGACTTCTAAGCTGCCTAAACAAAAGGTTGAAGAGCAGCCGCCGTCAGAAGAGAACTACGACG  
AAGTCATTAAGGCTTTGAAAACCTGCAGGTATAGATCCCGTCAAACCTGGCAGAAGCTCTCGCTAAATCAAACCCAAAAAATTGA

>pEC881\_2 (CP019027)

ATGTCCACAAAAATAAAAAAGGTAAAAATAACAAAGAAGTAGAAGATAATCTCGACAACCTTTGAAGAAGGTTCCCTTGAATTGTACACAGGGGAACTTGTC  
CCTAATAGCAACAATACAGTCCAACCAATTGCGTTGATGCGGCTGGGGTTGTTTCGTGCCTACGCTCAAGGGGACAAAATACAGCAAGCGTAACAAGCCAAATG  
AGATCGATGCTTCAAAGGAGCTTGTTTCAGCTCGAAGTAGCCCGTTCTGAAGGCTATTCCGATATCAAGATAACCGGTCCTCGTCTCGACATGGATCATGATTC  
AAAACGTGGGTGGGCGTTGTGCGTTCGCTGGCAGAATACGGCGAACCTAACGGTCGTGTTCGAGTTAAGCATCACGAAATTTGCGAAGTTTTGTGGCTATCCAT  
CGTCACAGATCCGCAAAACACTCCGCGACCGGCTTACAAACAGTCTTTTGAAGATCATGCGTACAACCTCTGTCTTTCCAGAGAACGTATGAAGAAAAGAATGT  
CGACGGCTCTAACAAGATCTCGCTTCTGATGGTGCACCTCATCAATAGCGTGGACTACAACGAGCAGAAAGATACGGTGGTGTCTATGCAGAACCGAAGCTG  
GCCGAACTATATCGCTTTGACCATAAGGTTCTTTTGCAGTTAAAGGTTATCAATAAGCTACCACGCAAAGAAACAGCACAGGCTCTGTACACCTTCATCGAAAG  
TCTTCCAACCAAGCCTGCGCCGGTATCGCTTGCTCGATTACGTGCGCGACTCAATTTGAGTAGCAGGAATGTCAGCTCGCAGAATCAGACTATACGTAACGGCT  
TAAAAGCTCTCCAAGATTTGGGCTATCTCGAATACAGCGAGATTAAGCGAGGGCGGTTCGATCTATATCCAGATTCACAGCCGCAATCCAAAACCTCAAAGTCGCA  
CCGCCAAAACCTGAAGACATCGAACCCAAAAAACAGATGAGAAAGCTGGGGAAATTGATGCCAAACAGAACATTATCAACAAGATAACCGAACTTTTCGCGAG  
AATTTGACGCCTGAAAATATCAAGATGATTGAGATCCTTTCCAATAGTCTCAAACCTGCTTTGA

>pRHB13-C13\_2 (CP057834)

ATGTCCACAAAAATAAAAAAGGTAAAAATAACAAAGAAGTAGAAGATAATCTCGACAACCTTTGAAGAAGGTTCCCTTGAATTGTACACAGGGGAACTTGTC  
CCTAATAGCAACAATACAGTCCAACCAATTGCGTTGATGCGGCTGGGATTGTTTCGTGCCACGCTCAAGGGGACAAAATACAGCAAGCGTAACAAGCCAAATG  
AGATCGATGCTTCAAAGGAGCTTGTTTCAGCTCGAAGTAGCCCGTTCTGAAGGCTATTCCGATATCAAGATAACCGGTCCTCGTCTCGACATGGATCATGATTC  
AAAACGTGGGTGGGCGTTGTGCGTTCGCTGGCAGAATACGGCGAACCTAACGGTCGTGTTCGAGTTAAGCATCACGAAATTTGCGAAGTTTTGTGGCTATCCAT  
CGTCACAGATCCGCAAAACACTCCGCGACCGGCTTACAAACAGTCTTTTGAAGATCATGCGTACAACCTCTGTCTTTCCAGAGAACGTATGAAGAAAAGAACGT  
CGACGGCTCTAACAAGATCTCGCTTCTGATGGTGCACCTCATCAATAGCGTGGACTACAACGAGCAGAAAGATACGGTGGTGTCTATGCAGAACCGAAGCTG  
GCCGAACTATATCGCTTTGACCATAAGGTTCTTTTGCAGTTAAAGGTTATCAATAAGCTACCACGCAAAGAAACAGCACAGGCTCTGTACACCTTCATCGAAAG  
TCTTCCAACCAAGCCTGCGCCGGTGTGCTGCTCGATTGCGTGCAGACTCAATTTGAGTAGCAGGAATGTCAGCTCGCAGAATCAGACTATACGCAACGGC  
TTAAAAGCTCTCCAAGATTTGGGTTATCTCGAATACAGCGAGATTAACGAGGGCGGTTCGATCTATATCCAGATTCACAGCCGCAATCCAAAACCTCAAAGTCGCA  
ACCGCCAAAACCTGAAGACATCGAACCCAAAAAACCTAGATGAGAAAGCTGGGGAAATTGATGCCAAACAGAACATTATCAACAAGATAACCGAACTTTTCGCA

GAATTTGACGCCTGAAAATATCAAGATGATTGAGATCCTTTCCAATAGTCTCAAACCTGCTTTGA

>pECOH89 (HG530657)

ATGTCCACAAAAATAAAAAAGGTAAAAATAACAAAGAAGTAGAAGATAACATCGACAACCTTTGAAGAAGGTTCCCTTGAATTGTACACAGGGGAACTTGTC  
CCTAATAGCAACAATACAGTCCAACCAATTGCGTTGATGCGACTGGGGTTGTTTCGTCCCCACGCTTAAGGGAACAAAATACAGTAAACGTAACAAGCCAAATG  
AGATCGATGCTTCAAAGGAGCTTGTCCAGCTCGAAGTAGCCCGTTCTGAAGGCTATTCCGATATCAAGATAACCGGTCCTCGTCTCGACATGGATCATGATTC  
AAAACGTGGGTGGGCGTTGTGCGTTCGCTGGCAGAATACGGCGAACCTAACGGTCGTGTGAGTTAAGCATCACGAAATTTGCGAAGTTTTGTGGCTATCCAT  
CGTCACAGATCCGCAAAACACTCCGCGACCGGCTTACAAACAGTCTTTTGAAGATCATGCGTACAACCTCTGTCTTTCCAGAGAACGTATGAAGAAAAGAACGT  
CGACGGCTCTAACAAGATCTCGCTTCTGATGGTGCACCTCATCAATAGCGTGGACTACAACGAGCAGAAAGATACGGTGGTGTCTATGCAGAACCGAAGCTG  
GCCGAACTATATCGCTTTGACCATAAGGTTCTTTTGCAGTTAAAGGTTATCAATAAGCTACCACGCAAAGAAACAGCACAGGCTCTGTACACCTTCATCGAAAG  
TCTTCCAACCAAGCCTGCGCCGGTATCGCTTGCTCGATTGCGTGCGGACTCAATTTGAGTAGCAGGAATGTCAGCTCGCAGAATCAGACTATACGTAACGGCT  
TAAAAGCTCTCCAAGATTTGGGCTATCTCGAATACAGCGAGATTAAGCGTGGGCGGTCGATCTATATCCAGATTCACAGCCGCAATCCAAAACCTCAAAGTCGCA  
CCGCCAAAACCTGAAGACATCGAACCCAAAAAACAGATGAGAAAGCTGGGGAAATTGATGCCAAACAGAACATTATCAACAAGATAACCGAACTTTTCGCAG  
AATTTGACGCCTGAAAATATCAAGATGATTGAGATCCTTTCCAATAGTCTCAAACCTGCTTTGA

>pCFSAN004177P\_01 (CP012496)

ATGTCCGGTAAAAGTAAAAAACTTTAAAAAACATAGAAATAAGAGATAGCCTCTCCAACCTTTGATGAAAATTCCGTTGAATTATATACAGGGAATCTTGTGCC  
CAATAGTAACAACACTGTCCAGCCTATCGCCCTCATGAGGCTTGGGTTGTTTGTGCCGACATTAAGGGGACAAAATTCAGCAAGCGTAACAGACCAAATGAG  
ATCGACGCATCCAGAGAGCTTGTGCAGATGGAAGTCGCCCGTTCTGAGGGATACACCGACATTAAGATAACGGGCCCACGCCTGGATATGGATCATGATTTCAA  
AACGTGGGTGGGTGTGGTGCCTCGCTGGCCGAATACGGCGAATCAAACGGGCGTGTGAGTTAAGCATACCAAATTCGCTAAGTTCTGCGGATACCCGTCG  
TCGCAAATTAGGAAAACACTTCGCGACCGGCTTACAAACAGCCTTTTGAATAATTATGCGTACCACATTGTCCTTCCAGCGGACTTATGAAGAAAAGAACGTAG  
ACGGCTCAAACAAGATATCGCTTCTGATGGTACACCTCATCAATAGTGTGGACTACAACGAGCAGAAAGACACTGTGGTGTCTATGCGGAACCTAAGCTCGC  
GGAACCTATCGTTTTGACCATAAGGTTCTTCTGCAACTAAAGGTTATCAATAAGCTACCTCGTAAAGAACTGCACAGGCTCTGTATACGTTTATTGAAAGCCT  
TCCACCAAACCCAGCACCAGTATCTCTTGCAGTTTACGGGCGGACTTAACCTGAGCAGCAGAAACGTTAGTTTCGAGAATCAGACTATACGTAATGGTCTTA  
AATCACTTAAAGAACTGGGCTATCTCGACTACAGCGAGCTTAAGCGCGGGCGCTCTGTCTACATTCAGATCCATAATCGAAATCCAAAACCTGAAAGCTTCCTCG  
CCTAAAATCAAAAACGATGTTATCGAAGAAGCGAGTAAACAAGAACAGAAGGATGGAAGGTTGATGCGAAGCAGAATCTTATCAATAAGATAACTGAGCTT  
TCTCAGGATTTAACGCCCGAGAATATCAAATGATTGAGATACTTTCTAACAGTCTCAAACCTGCTTTGA

>pCFSAN004176P\_01 (CP012492)

ATGTCCGGTAAAAGTAAAAAACTTTAAAAAACATAGAAATAAGAGATAGCCTCTCCAACCTTTGATGAAAATTCCGTTGAATTATATACAGGGAATCTTGTGCC  
CAATAGTAACAACACTGTCCAGCCTATCGCCCTCATGAGGCTTGGGTTGTTTGTGCCGACATTAAGGGGACAAAATTCAGCAAGCGTAACAGACCAAATGAG  
ATCGACGCATCCAGAGAGCTTGTGCAGATGGAAGTCGCCCGTTCTGAGGGATACACCGACATTAAGATAACGGGCCACGCCTGGATATGGATCATGATTTCAA  
AACGTGGGTGGGTGTGGTGCCTCGCTGGCCGAATACGGCGAATCAAACGGGCGTGTGAGTTAAGCATCACCAAATTCGCTAAGTTCTGCGGATACCCGTCG  
TCGCAAATTAGGAAAACACTTCGCGACCGGCTTACAAACAGCCTTTTAAAAATTATGCGTACCACATTGTCCTTCCAGCGGACTTATGAAGAAAAGAACGTAG  
ACGGCTCAAACAAGATATCGCTTCTGATGGTACACCTCATCAATAGTGTGGACTACAACGAGCAGAAAGACACTGTGGTGTCTATGCGGAACCTAAGCTCGC  
GGAECTCTATCGTTTTGACCATAAGGTTCTTCTGCAACTAAAGGTTATCAATAAGCTACCTCGTAAAGAAAAGTGCACAGGCTCTGTATACGTTTTATTGAAAGCCT  
TCCACCAAACCCAGCACCAGTATCTCTTGCACGTTTACGGGCGCGACTTAACCTGAGCAGCAGAAACGTTAGTTTCGAGAATCAGACTATACGTAATGGTCTTA  
AATCACTTAAAGAAGTGGGCTATCTCGACTACAGCGAGCTTAAAGCGGGGCGCTCTGTCTACATTCAGATCCATAATCGAAATCCAAAAGTAAAGCTTCCTCG  
CCTAAAATCAAAAACGATGTTATCGAAGAAGCGAGTAAACAAGAACAGAAGGATGGAAAAGTTGATGCGAAGCAGAATCTTATCAATAAGATAACTGAGCTT  
TCTCAGGATTTAACGCCCGAGAATATCAAATGATTGAGATACTTTCTAACAGTCTCAAAGTCTTGA

>AnCo3 (KY515226)

ATGCTGTCAGCGGTAAAAGATAGTCTGTCAGCGGCAAGCAATATGCTGTTGTCTGTTTTTTGTAGGCTGTCAGCGGTAAATAACGTATGCTGTCAGCGGTTGAA  
CGAGAAAGGTATCCACATGTCCACAAAAAATAAAAAAGGCAACAGTAACAAGAAGTAGAAGATAACCTCGACAACCTTGAAGAAGATTCTCTCGAATTGTA  
CACAGGGGATCTTGTACCCAATAATAAACACGGTGCAGCCTATCGCCCTGATGAGGCTTGGTCTGTTTCGTTCCAACGTTAAAGGGGACTAAACACAGCAAA  
CGTAACAGACCAAACGAGATTGATGCTTCAAAGGAGCTTGTCCAGCTAGAAGTTGCTCGTTCAGAGGGTTACTCCGATATTAAGATAACAGGTCCGCGCTTGG  
ATATGGATCATGATTTTAAACGTGGGTGCGTGTGTACGTTTCGCTGGCTGAATACGGAGAGGCTAGTGGGCGTGTGAGTTAAGTATCACTAAGTTTCGCAAAA  
TTTTGTGGCTACCCATCGTCACAAATTAGAAAACTCTTCGGGACAGACTTACAAACAGTCTCCTGAAAATTATGCGTACCACATTGCTTTTTTCAGCGCACATAT  
GAAGAAAAGAACGTAGATGGCTCAAATAAGATCTCACTTCTGATGGTTCACCTCGTCAATAGCGTGGACTACAACGAGCAGAAAGACACGGTCGTTTTTTATG  
CCGAACCTAAGCTTGCAGAACTGTATCGCTTCGACCATAAGGTTCTACTCCAGTTGAAGGTCATTAATAAACTTCCACGCAAAGAAACGGCACAGGCGCTGTAT  
ACGTTTCATCGAAAAGTCTTCCAGCCAAACCTGCACCGGTTTCTCTCGCTCGTCTGCGAGCAGACTAAATCTGAGTAGTAGAAACGTCAGTTCGCAGAACCAGA  
CCATACGCAACGGCTTAAATCTCTCAAAGAGCTTGGTTATCTGGACTACAGCGAGATTAAGCGCGGACGCTCGATCTACATTCAGATCMACAGTCGCAACCC  
GAAACTAAAAGTCGCTTCCGTGAAACCAGAAGGCATCGGAGAGCTAGACAAACCGACTGAAAAGAGAGGGGAAATCGATGCGAAACAGAATCTTGTCAATA  
AGATAACCGAGCTGTGCAAAAATCTGACGCCGAAAACATCAAGCTGATAGAGATACTCACAAATAGTCTTAAAGTCTTGA

>pSTM\_Phi (KP763470)

ATGCTGTCAGCGGTAAAAGATAGTCTGTCAGCGGCAAGCAATATGCTGTTGTCTGTTTTTTGTATGCTGTCAGCGGTAAATAACGTATGCTGTCAGCGGTTGAA

CGAGAAAGGTATCCACATGTCCACAAAAATAAAAAAGGCAACAGTAACAAAGAAGTAGAAGATAACCTCGACAACCTTGAAGAAGATTCTCTCGAATTGTA  
CACAGGGGATCTTGTACCCAATAATAAACACGGTGCAGCCTATCGCCCTGATGAGGCTTGGTCTGTTTCGTTCCAACGTTAAAGGGGACTAAACACAGCAAA  
CGTAACAGACCAAACGAGATTGATGCTTCAAAGGAGCTTGTCCAGCTAGAAGTTGCTCGTTCAGAGGGTTACTCCGATATTAAGATAACAGGTCCGCGCTTGG  
ATATGGATCATGATTTTAAACGTGGGTCGGTGTGTACGTTTCGCTGGCTGAATACGGAGAGGCTAGTGGGCGTGTGAGTTAAGTATCACTAAGTTCGCAAAA  
TTTTGTGGTTACCCATCGTCACAAATTAGAAAACTCTTCGGGACAGACTTACAAACAGTCTCCTGAAAATTATGCGTACCACATTGTCTTTTCAGCGCACATAT  
GAAGAAAAGAACGTAGATGGCTCAAATAAAATCTCACTTCTGATGGTTCACCTCGTCAATAGCGTGGACTACAACGAGCAGAAAGACACGGTTCGTTTTTATG  
CCGAACCTAAGCTTGCAGAACTGTATCGCTTCGACCATAAGGTTCTACTCCAGTTGAAGGTCATTAATAAACTTCCACGCAAAGAAACGGCACAGGCGCTGTAT  
ACGTTTCATCGAAAGTCTTCCAGCCAAACCTGCACCGGTTTCTCTCGCTCGTCTGCGAGCACGACTAAATCTGAGTAGTAGAAACGTCAGTTCGCAGAACCAGA  
CCATACGCAACGGCTTAAATCTCTCAAAGAGCTTGGTTATCTGGACTACAGCGAGATTAAGCGCGGACGCTCGATCTACATTCAGATCCACAGTCGCAACCCG  
AACTAAAAGTCGCTTCCGTGAAACCAGAAGGCATCGGAGAGCTAGACAAACCGACTGAAAAGATAGGGGAAATCGATGCGAAACAGAATCTTGTCAATAA  
GATAACCGAGCTGTCGCAAAATCTGACGCCGAAAACATCAAGCTGATAGAGATACTCACAAATAGTCTTAAACTGCTTTGA

>pSAN1-1735 (CP014707)

ATGCTGTCAGCGGTAAGGTTAGTCTGTCAGCGGCAAGCAATATGCTGTTGTCTGTTTTTGTATGCTGTCAGCGGTAATAACGTATGCTGTCAGCGGTTGAA  
CGAGAAAGGTATCCACATGTCCACAAAAATAAAAAAGGCAACAGTAACAAAGAAGTAGAAGATAACCTCGACAACCTTGAAGAAGATTCTCTCGAATTGTA  
CACAGGGGATCTAGTGCCAATAACAATAACTGTACAGCCTATCGCCCTGATGAGGCTTGGTCTGTTTCGTTCCAACGTTAAAGGGGACTAAACACAGCAAA  
CGTAACAGACCAAACGAGATTGATGCTTCAAAGGAGCTTGTTCAGTTAGAGGTTGCTCGTTCAGAGGGTTACTCCGATATTAAGATAACAGGTCCGCGCTTGG  
ATATGGATCATGATTTTAAACGTGGGTCGGTGTGTACGTTTCGCTGGCTGAATACGGAGAGGCTAGTGGGCGTGTGAGTTAAGCATCACTAAGTTCGCAAAA  
TTTTGTGGCTACCCATCGTCACAAATTAGAAAACTCTTCGGGACAGACTTACAAACAGTCTCCTGAAAATTATGCGTACCACATTGTCTTTTCAGCGAACATAT  
GAAGAAAAGAACGTAGATGGCTCAAATAAGATCTCACTTCTGATGGTTCACCTCGTCAATAGCGTGGACTACAACGAGCAGAAAGACACGGTTCGTTTTTATG  
CCGAACCTAAGCTTGCAGAACTGTATCGCTTCGACCATAAGGTTCTACTCCAGTTGAAGGTCATTAATAAACTTCCACGCAAAGAAACGGCACAGGCGCTGTAT  
ACGTTTCATCGAAAGTCTTCCAGCCAAACCTGCACCGGTTTCTCTCGCTCGTCTGCGAGCACGACTAAATCTGAGTAGTAGAAACGTCAGTTCGCAGAACCAGA  
CCATACGCAACGGTTTGAATCTCTCAAAGAGCTTGGTTATCTGGACTACAGCGAGATTAAGCGCGGACGCTCGATCTACATTCAGATCCACAGTCGCAACCCG  
AACTAAAAGTCGCTTCCGTGAAACCAGAAGGCATCGGAGAGCCAGACAAACCGACTGAAAAGAGCGGGGAAATCGATGCGAAACAGAATCTTGTCAATAA  
GATAACCGAGCTGTCGCAAAATCTGACGCCGAAAACATCAAGCTGATAGAGATACTCTCAAATAGTCTTAAACTGCTTTGA

>pCS (CP012254)

ATGCCACTCGACAGAAAAAAGAAACCAAAAACAATGCGTTAGACGACAGTATAGATAATTTTGAAGAAGAATCCCTCGAACTATACACAGGCGATCTTGTTC

CAAACAGCAACAATACTGTTTCAGCCTATAGCGTTGATGAGACTCGGTTTGTTCGTGCCACGCTAAAGGGGACAAAGAACAGCAAGCGGAACAGACCTAATG  
AGATCGACGCCTCAAAGAAGTGGTTCAGCTGGAGGTTGCTCGTTTCAGAAGGGTATTCCGACATCAAGATAACAGGTCCACGCCTGGATATGGATCACGATTT  
TAAAACGTGGGTCGGCGTCGTGCGCTCTCTGGCCGAGTACGGGGAGCCGAGTGGCCGCGTCGAGTTGAGCATTACCAAGTTCGCCAAATTCTGCGGCTATCCG  
TCGTGCGCAGATCCGCAAGACGCTGCGTGACAGGCTCACCAACAGCCTCCTGAAGATCATGCGCACCACGCTCTCTTTCCAGCGCACGTATGAAGAAAAGAAC  
GTCGACGGCTCGAACAAAATCTCGCTCCTGATGGTTCACCTGGTGAACAGCGTCGATTACAACGAGCAAAAAGACTCCATCATCTTTCACGCAGAGCCGAAG  
CTGGCCGAACTCTATCGCTTCGACCACAAAGTGCTGCTCCAGCTAAAAGTCATTAACAAGCTGCCGCGCAAAGAGACCGCCAGGGCGCTGTATACGTTTCATCG  
AAAGTCTTCCAGCCAAACCGGCACCAGTATCGCTGGCAAGGCTTCGAGCTAGACTTAATTTGAGTAGTCGCAACGTCAGCTCGCAGAACCAGACCATCCGCA  
ACGGCTTAAAACGCTGGAGGAATTGGGCTATCTCGAATACAGCGAGATTAAGCGTGGCCGCTCGATTTACATTCAGATCCACAGCCGCAATCCCAAGCTTAA  
AGCCTCTTCGGTCAAAGAGGAAATGCCCGCGCTTCCGGATAAGCCGGTCGAGAACACGTCTTCTGGTGTGCGATGCAAAAACAAAACCTCGTGAACAAAATCAC  
CGAGTTATCGCAGAACCTGACGCCCCGAAAACATCAAGCTGATCGAGATTCTCTCCAACAGCCTGAAACTCCTTTGA

>pCsaCS931a (CP027108)

ATGCCCACTCGACAGAAAAAAGAAACCAAAAACAATGTGTTAGACGACAGTATAGATAATTTGAAGAAGAATCCCTCGAACTATACACAGGCGATCTTGTT  
CAAACAGCAACAATACTGTTTCAGCCTATAGCGTTGATGAGGCTTGGTTTGTTCGTGCCACGCTAAAGGGAACAAAGAACAGCAAGCGGAACAGACCTAATG  
AGATCGACGCCTCAAAGAAGTGGTTCAGCTGGAGGTTGCTCGTTTCAGAAGGGTATTCCGACATCAAGATAACAGGTCCACGCCTGGATATGGATCACGATTT  
TAAAACGTGGGTCGGCGTCGTTTCGCTCTCTGGCCGAGTACGGGGAGCCGAGTGGCCGCGTCGAGTTGAGCATTACCAAGTTCGCCAAATTCTGCGGCTATCCG  
TCGTGCGCAGATCCGCAAGACGCTGCGTGACAGGCTCACCAACAGCCTCCTGAAGATCATGCGCACCACGCTCTCTTTCCAGCGCACGTATGAAGAAAAGAAC  
GTCGACGGCTCGAACAAAATCTCGCTCCTGATGGTTCACCTGGTGAACAGCGTCGATTACAACGAGCAAAAAGACTCCATCATCTTTCACGCAGAGCCGAAG  
CTGGCCGAACTCTATCGCTTCGACCACAAAGTGCTGCTCCAGCTAAAAGTCATTAACAAGCTGCCGCGCAAAGAGACCGCCAGGGCGCTGTATACGTTTCATCG  
AAAGTCTTCCAGCCAAACCGGCACCAGTATCGCTGGCAAGGCTTCGAGCCAGACTTAATTTGAGTAGTCGTAACGTCAGCTCGCAGAATCAGACCATCCGCAA  
CGGCTTAAAACGCTGGAGGAATTGGGCTATCTCGAATACAGCGAGATTAAGCGTGGCCGCTCGATTTACATTCAGATCCACAGCCGCAATCCCAAGCTCAA  
GCCTCTTCGGTCAAAGAGGAAATGCCCGCGCTTCCGGATAAGCCGGTCGAGAGCACGTCTTCTGGTGTGCGATGCAAAAACAAAACCTCGTGAACAAAATCACC  
GAGTTATCGCAGAACCTGACGCCCCGAAAACATCAAGCTGATCGAGATTCTCTCCAACAGCCTGAAACTCCTTTGA

>pB16KP0177-3 (CP052527)

ATGTCCACAAGAAAGAAAAAAGAGAGCGATATCAAAGAAATACCTGAAGACAACGAAATTCCTGAGGAAGAAGCTCTCACTTTGTACACAGGTGATTTAGTT  
CCTAACAGCAACAACACGGTGCAGCCAATCGCTTTAATGCGTCTTGGCCTCTTCGTGCCGACACTCAAAGGAACGAAGAATAGCTCTCGCAACAAGTCCAAC  
ATGATCGACGCATCCAGAGAGCTTGTCCAGCTGGAAGTCGCGCGGTCAGAGGGTTATTCAAACATTAATAATCACCGGTCCTCGACTGGATATGGATCATGACTT

CAAAACCTGGGTTGGTGTGTTTCGCTCTCTGGCTGAATACGGCGAGCCAACCGGGCGCGTTGAGCTGAGCATCACGAAGTTCGCCAAGTTCTGCGGCTACCC  
GTCTTCGCAGATCCGCAAAACCCTGCGAGACCGCCTGACAAATAGCCTGCTCAAGATCATGCGCACGACGTTGTCGTTCCAGCGCACTCATGAAGAGAAGAA  
CGTCGACGACACCAACAAGATATCCCTGTTGATGGTTCACCTCATAAACAGCGTTGATTACAACGAGAAGAAAGACTCTATTGTCTTTTATGCTGAACCTAAGC  
TGTCTGAGCTCTATCGCTTTGACCACAAAGTTCTGCTGCAGTTAAAGGTCATCAACAAGCTCCCGCGCAAGGAGACGGCCCAGGCGCTGTATACTTTCATCGA  
AAGTCTTCCTCCTAAGCCGGCACCGGTATCTCTCGCCCGGCTGCGCGCCAGGCTGAATCTGAGCACGCGCAACGTCAGTTCGCAAAACCAGACTATCAGGAA  
CGGATTGAAGTCACTGCAAGAGCTGGGCTATCTCGAATATAGCGAGGTTAAGCGTGGCCGTTCTGTCTACATCCAGATCCACAGTCGTAACCCAAAACCTGAAA  
GTAACATCGAGCAAACCTGAGAAGCCAGAGTCGCCTAAGCAGGCAGAAGAAGCGAAGGGTGAAATTGATGCGAAACAGAACCTCAAAAACAAAATTTCTGA  
GCTGTCGAGAACCTGACGCCAGAGAATATCAAGCTGATCGAGATACTACCAATAGCCTCAAATTGCTTTGA

>pC16KP0189-2 (CP052416)

ATGTCCACAAGAAAGAAAAAAGAGAGCGATATCAAAGAAATACCTGAAGACAACGAAATTCCTGAGGAAGAAGCTCTAACTTTGTACACAGGTGATTTAGTT  
CCTAACAGCAACAACACGGTGCAGCCAATCGCTTTAATGCGTCTTGGCCTCTTCGTGCCGACACTCAAAGGAACGAAGAATAGCTCTCGCAACAAGTCCAAC  
ATGATCGACGCATCCAGAGAGCTTGTCCAGCTGGAAGTCGCGCGGTTCAGAGGGTTATTCAAACATTAATAATCACCGGTCCTCGACTGGATATGGATCATGACTT  
CAAAACCTGGGTTGGTGTGTTTCGCTCTCTGGCTGAATACGGCGAGCCAACCGGGCGCGTTGAGCTGAGCATCACGAAGTTCGCCAAGTTCTGCGGCTACCC  
GTCTTCGCAGATCCGCAAAACCCTGCGAGACCGCCTGACAAACAGCCTGCTCAAGATCATGCGCACGACGTTGTCGTTCCAGCGCACTCATGAAGAGAAGAA  
CGTCGACGACACCAACAAGATATCCCTGTTGATGGTTCACCTCATAAACAGCGTTGATTACAACGAGAAGAAAGACTCTATTGTCTTTTATGCTGAACCTAAGC  
TGTCTGAGCTCTATCGCTTTGACCATAAAGTTCTGCTGCAGTTGAAGGTCATCAACAAGCTCCCGCGCAAAGAGACGGCCCAGGCGCTGTATACTTTCATCGA  
AAGTCTTCCTCCTAAGCCGGCACCGGTATCTCTTGCCCGGCTGCGCGCCAGGCTCAATCTGAGCACGCGCAACGTCAGTTCGCAAAACCAGACTATCAGGAAC  
GGATTGAAGTCACTGCAAGAGCTGGGCTATCTCGAATATAGCGAGGTTAAGCGTGGCCGTTCTGTCTACATCCAGATCCACAGTCGTAACCCAAAACCTGAAAG  
TAACATCGAGCAAACCTGAGAAGCCAGAGTCGCCTAAGCAGGCAGAAGAAGCGAAGGGTGAAATTGATGCGAAACAGAACCTCAAAAACAAAATTTCTGAG  
CTGTCGAGAACCTGACGCCAGAGAATATCAAGCTGATCGAGATACTTACCAATAGCCTCAAATTGCTTTGA

>pKPHS1 (CP003223)

ATGCTGTCAGCGGTAAACGATATGCTGTCAGCGGTACGGTATATGCTGCCAACGGTTTTGTGTAIGCTATCAGCGGTAATTGACGTATGCTGTCAGCGGTTAGAA  
CCAAAAGGTATCCACATGTCCACAAAAAATAAAAAAGAGAGTGAAATCAAAGAAATACCTGAGGATAACGAAATTCCTGAGGAAGATGCTCTCAATTTGTACA  
CAGGTGACTTAGTTCCTAACAGCAACAATACGGTGCAGCCAATCGCTTTAATGCGCCTTGGCCTCTTTGTTCCAACGCTCAAGGGAACGAAGAATAGCTCTCG  
CAACAAGTCCAACATGATCGACGCATCCAGGGAGCTTGTCCAGCTTGAAGTCGCGCGGTTCAGAGGGTTATTCAAACATTAATAATCACCGGTCCCGCGCTGGAT  
ATGGATCATGACTTCAAACCTGGGTTGGTGTGTTTCGCTCTCTGGCTGAATACGGCGAGCCAACAGGGCGCGTAGAGCTGAGCATCACGAAGTTCGCCAAGT

TCTGCGGCTACCCGTCCTCGCAGATCCGCAAGACCCTGCGAGACCGCCTGACAAACAGCCTGCTCAAGATCATGCGCACGACGTTGTCGTTCCAGCGCACTCA  
TGAAGAGAAGAACGTCGACGACACCAACAAGATATCCCTGTTGATGGTTCACCTCATAAACAGCGTTGATTACAACGAGAAGAAAGACTCCATTGTCTTTTAT  
GCTGAACCTAAGCTGTCTGAGCTCTATCGCTTTGACCACAAAGTTCTGCTGCAGTTGAAGGTCATCAACAAGCTCCC GCGCAAAGAGACGGCACAGGCGCTG  
TATACTTTCATCGAAAGTCTTCCTCCTAAGCCGGCACCGGTATCTCTTGCCCGGCTGCGCGCCAGGCTCAATCTGAGCACGCGCAACGTCAGCTCGCAAAACC  
AGACTATCAGGAACGGATTGAAGTCACTGCAAGAGCTGGGCTATCTCGAATATAGCGAGGTTAAGCGTGGCCGTTCTGTCTACATCCAGATCCACAGTCGTAAC  
CCAAAAGTCAAAGTCACTCGAGCAAACCCGAGAAGCCAGAGGCGCCTAAGCAGGCAGAAGAAGCGAAGGGTCAAATTGATGCGAAACAGAACCTCAAAA  
ACAAAATTTCTGAGCTGTGCGAGAACCTGACGCCAGAGAATATCAAGCTGATCGAGATACTACCAATAGCCTCAAGTTGCTTTGA

>pCAV1015-111 (CP017931)

ATGTCCACAGCCAAGAAAAAAGGCAGAAAAAACATAGCTGAAGATTCAGAAAATGAGATCTTTGATGTGGACTCATCCACAGAGCCAGATGACCTTGATGAA  
GGCTCTCTCAAACCTTATACAGGGGATCTGACCCCAATAGCAACAACACAGTTCAACCTATCGCGTTAATGCGACTTGGTTTATTTGTCCCGACACTAAAAGG  
CACAAGGAATAGTAAACGAAACAAGTCGAATGAGATAGACGCCTCGAAAGAGCTGGTTCAGCTGGAAGTCGCTCGTTCGGAAGGTTATGCCGACATCAAAAT  
CACCGGCCCCAGACTGGACATGGATCACGACTTCAAACATGGGTTGGGGTGGTTCGTTCTTTAGCTGAATACGGCGAGGCCAGTGGGCGCGTGGAGTTGAG  
CATTACGAAGTTTGCAAATTTCTGCGGCTATCCTTCATCGCAAATCCGCAAAACATTACGTGACAGGCTCACAATAGCCTTCTGAAAATAATGCGGACGACGC  
TTTCCTTCCAGCGCACGTATGAAGAGAAGAACGTCGACGGCTCGAATAAGATCTCGCTCCTGATGATGCACCTCATAAACAGCGTTGATTACAACGAGAAGAA  
AGACACCATCATTTTTTCAGGCCGAGCCTAAGCTGTCAGAGCTGTATAGGTTGACCATAAGGTGCTCCTGCAACTGAAGGTCATAAACAACCTCCCGCGTAAG  
GAGACGGCCCAGGCGCTGTATACGTTTCATCGAAAGTCTCCCAACAAAGCCGGCCCCCATCTCCCTAGCGAGGCTAAGAGCCAGACTCAATCTGAGTTCGAAC  
AACGTTAGCTCCCAAATCAGACGATCCGAAATGGCCTCAAGTCTCTCCAGGAACTTGGGTATCTCGACTACAGCGAGATCAAGCGTGGCCGGTCTGTCTATAT  
CCAAATTCATAACCGAAATCCGAAGCTGAAAGTCACTGGTGGCAAGCCTGATGAACCACCTAAAGAGAAGCCTCCAGTGAAGGTAATTCCGACACTAAGCA  
GAATCTTATCAATAAGATAGCTGAGCTTTCCAAGGACCTGACCCCGAGAATATTAGGCTTATTGAGATCCTTAGCAACAGCCTGAAGCTTGTTTGA

>pRHBSTW-00909\_5 (CP056140)

ATGTCCACAGCCAAGAAAAAAGGCAGAAAAAACATAGCTGAAGATTCAGAAAATGAGATCTTTGATGTGGACTCATCCACAGAGCCAGATGACCTTGATGAA  
GGCTCTCTCAAACCTTATACAGGGGATCTGACCCCAATAGCAACAACACAGTTCAACCTATCGCGTTAATGCGACTTGGTTTATTTGTCCCGACACTAAAAGG  
CACAAGGAATAGTAAACGAAACAAGTCGAATGAGATAGACGCCTCGAAAGAGCTGGTTCAGCTGGAAGTCGCTCGTTCGGAAGGTTATGCCGACATCAAAAT  
CACCGGCCCCAGACTGGACATGGATCACGACTTCAAACATGGGTTGGGGTGGTTCGTTCTTTAGCTGAATACGGCGAGGCCAGTGGGCGCGTGGAGTTGAG  
CATTACGAAGTTTGCAAATTTCTGCGGCTATCCTTCATCGCAAATCCGCAAAACATTACGTGACAGGCTCACAATAGCCTTCTGAAAATAATGCGGACGACGC  
TTTCCTTCCAGCGCACGTATGAAGAGAAGAACGTCGACGGCTCGAATAAGATCTCGCTCCTGATGATGCACCTCATAAACAGCGTTGATTACAACGAGAAGAA



AGACACCATCATTTTTTCAGGCCGAGCCTAAGCTGTCAGAGCTGTATAGGTTGACCATAAGGTGCTCCTGCAACTGAAGGTCATAAACAAACTCCCGCGTAAG  
GAGACGGCCAGGCGCTGTATACGTTTCATCGAAAGTCTCCCAACAAAGCCGGCCCCATCTCCCTAGCGAGGCTAAGAGCCAGACTCAATCTGAGTTCGAAC  
AACGTTAGCTCCCAAATCAGACGATCCGAAATGGCCTCAAGTCTCTCCAGGAACTTGGGTATCTCGACTACAGCGAGATCAAGCGTGGCCGGTCTGTCTATAT  
CCAAATTCATAACCGAAATCCGAAGCTGAAAGTCACTGGTGGCAAGCCTGATGAACCACCTAAAGAGAAGCCTCCAGTGGAAGGTAATTCGGACACTAAGCA  
GAATCTTATCAATAAGATAGCTGAGCTTTCCAAGGACCTGACCCCCGAGAATATTAGGCTTATTGAGATCCTTAGCAACAGCCTGAAGCTTGTTTGA

>pCAV1752-111 (CP018360)

ATGTCCACAGCCAAGAAAAAAGGCAGAAAAACATAGCTGAAGATTCAGAAAATGAGATCTTTGATGTGGACTCATCCACAGAGCCAGATGACCTTGATGAA  
GGCTCTCTCAAACTTTATACAGGCGATCTGACCCCCAATAGCAACAACACAGTTCAACCTATCGCGTTAATGCGACTTGGTTTATTTGTCCCGACACTAAAGGG  
CACAAGGAATAGTAAACGAAACAAGTCGAATGAGATAGACGCCTCGAAAGAGCTGGTTCAGCTGGAAGTCGCTCGTTCCGAAGGTTATGCCGACATCAAAT  
CACCGGCCCCAGACTGGACATGGATCACGACTTCAAACATGGGTTGGGGTGGTTCGTTCTTTAGCTGAATACGGCGAGGCCAGTGGGCGCGTGGAGTTGAG  
CATTACGAAGTTTGCAAATTTCTGCGGGCTATCCTTCATCGAAATCCGCAAAACATTACGTGACAGGCTCACAAATAGCCTTCTGAAAATAATGCGGACGACGC  
TTTCTTCCAGCGCACGTATGAAGAGAAGAAGTCGACGGCTCGAATAAGATCTCGCTCCTGATGATGCACCTCATAAACAGCGTTGATTACAACGAGAAGAA  
AGACACCATCATTTTTTCAGGCCGAGCCTAAGCTGTCAGAGCTGTATAGGTTGACCATAAGGTGCTCCTGCAGCTGAAGGTCATAAACAAACTCCCGCGTAAG  
GAGACGGCCAGGCGCTGTATACGTTTCATCGAAAGTCTCCCAACAAAGCCGGCCCCATCTCCCTAGCGAGGCTAAGAGCCAGACTCAATCTGAGTTCGAAC  
AACGTTAGCTCCCAAATCAGACGATCCGAAATGGCCTCAAGTCTCTCCAGGAACTTGGGTATCTCGACTACAGCGAGATCAAGCGTGGCCGGTCTGTCTATAT  
CCAAATTCATAACCGAAATCCGAAGCTGAAAGTCACTGGTGGCAAGCCTGATGAACCACCCAAAGAGAAGCCTCCAGTGGAAGGTAATTCGGACACTAAGCA  
GAATCTTATCAATAAGATAGCTGAGCTTTCCAAGGACTTGACCCCCGAGAATATTAGGCTTATCGAGATCCTTAGCAACAGCCTGAAGCTTGTTTGA

>p1761\_03 (CP039977)

ATGTCCACAGGCCAAAAAAGAAGAAAGAAAACATACCGTTAATCGATGATGATGACGCGATCGACGAAAGTGTTCCGGCGTTATTACAGGCGACCTCACC  
CCTAACAGCAACAATACCGTACAACCCATTGCGTTGATGAGACTTGGATTGTTTCGTTCCCACGCTCAAAGGCACGAAGAATAGTAAACGAAATAACTCCAACC  
AGATAGACGCCTCAAAGAAGTGGTGCAACTGGAGGTTGCGAGATCTGAGGGTTATTCCGATATCAAATAACCGGTCCACGTCTCGATATGGATCACGACTTC  
AAGACGTGGGTTGGTGTCTGTCGATCACTTGCCGAGTATGGGGAGGCCAGTGGGCGCGTTGAGCTAAGCATCACGAAGTTTGCCAAGTTCTGTGGGTATCCAT  
CTTCCCAGATACGCAAGACGCTGCGAGACAGGATTACGAACAGCCTGCTGAAGATAATGCGCACAACGCTTTTCGTTCCAGCGCACATACGAAGAGAAGAACG  
TGGACGGCTCGAACAAGATATCTCTGCTCATGGTTCATCTGGTGAATAGCGTGGATTACAATGAGAAAAATGACACCATCATATTTACGCCGAACCAAAGCTG  
TCAGAGCTATACCGTTTTGACCACAAAGTTCTTCTCCAAGTGAAGGTCATCAACAACTTCCACGTAAGAAACCGCCAGGCGCTATACACCTTCATTGAAA  
GTCTTCCGGCGCGGCCGGCGCCAATATCTCTGGCTCGTTTTCGCTGCGAGGTTGAATCTGAATAGCTCAAGCATCAGCTCCCAAATCAGACCATTGAAACGG

TCTGAAGTCTCTTAAAGAGCTTGGCTACCTCGATTACTCAGAGGTGAAGCGTGGTCGCTCTGTATTTATTCAGATTCATGGACGCAACCCGAAACTTAAAGTCA  
TTGGTGAAGAGAAACCGCCGAAGCCTGAGAAGCCTGCAGAGCAAGTGGAAGGGCCACAAGAGAACGGCGAGCTGGACGTCGTAAAACAAAACATGATCAA  
GAAGATAGCTGAACTTTCTGCGGATTTGACGCCTGAGAATATAAAGCTAATTGAGATACTTAGTAACGGTCTGAAGTTGCTTTGA

>pCP032196 (CP032196)

ATGTCCACAGGCAAAAAAAAAAGAAGAAAGAAAACATACCGTTAATCGATGATGATGACGCGATCGACGAAAGTGTTCCGGCGTTATTCACAGGCGACCTCACC  
CCTAACAGCAACAATACCGTACAACCCATTGCGTTGATGAGACTTGGATTGTTTCGTTCCACGCTCAAAGGCACGAAGAATAGTAAACGAAATAACTCCAACC  
AGATAGACGCCTCAAAGAAGACTGGTGCAACTGGAGGTTGCGAGATCTGAGGGTTATTCCGATATCAAATAACCGGTCCACGTCTCGATATGGATCACGACTTC  
AAGACGTGGGTTGGTGTCTGTCGATCACTTGCCGAGTATGGGGAGGCCAGTGGGCGCGTTGAGCTAAGCATCACGAAGTTTGCCAAGTTCTGTGGGTATCCAT  
CTTCCCAGATACGCAAGACGCTGCGAGACAGGATTACGAACAGCCTGCTGAAGATAATGCGCACAACGCTTTCGTTCCAGCGCACATACGAAGAGAAGAACG  
TGGACGGCTCGAACAAGATATCTCTGCTCATGGTTCATCTGGTGAATAGCGTGGATTACAATGAGAAAAATGACACCATCATATTTACGCCGAACCAAAGCTG  
TCAGAGCTATACCGGTTTGACCACAAAGTTCTTCTCCAAGTCAAGGTCATCAACAACTTCCACGTAAAGAAACCGCCAGGGCGCTATACACCTTCATTGAAA  
GTCTTCCGGCGCGGCCGGCGCCAATATCTCTGGCTCGTTTTCGTTGCGAGGTTGAATCTGAATAGCTCAAGCATCAGCTCCCAAATCAGACCATTGAAACGG  
TCTGAAGTCTCTTAAAGAGCTTGGCTACCTCGATTACTCAGAGGTGAAGCGTGGTCGCTCTGTATTTATTCAGATTCATGGACGCAACCCGAAACTTAAAGTCA  
TTGGTGAAGAGAAACCGCCGAAGCCTGAGAAGCCTGCAGAGCAAGTGGAAGGGCCACAAGAGAACGGCGAGCTGGACGTCGTAAAACAAAACATGATCAA  
GAAGATAGCTGAACTTTCTGCGGATTTGACGCCTGAGAATATAAAGCTAATTGAGATACTTAGTAACGGCCTGAAGTTGCTTTGA

>pRHB30-C05\_4 (CP057316)

ATGTCCACAGGCAAAAAAAAAAGAAGAAAGAAAACATACCGTTAATCGATGATGATGACGCGATCGACGAAAGTGTTCCGGCGTTATTCACAGGCGACCTCACC  
CCGAACAGCAACAATACCGTACAACCCATTGCGTTGATGAGACTTGGATTGTTTCGTTCCACGCTCAAAGGCACGAAGAATAGTAAACGAAATAACTCCAACC  
AGATAGACGCCTCAAAGAAGACTGGTGCAACTGGAGGTTGCGAGATCTGAGGGTTATTCCGATATCAAATAACCGGGCCACGTCTCGATATGGATCACGACTT  
CAAGACGTGGGTTGGTGTCTGTCGATCACTTGCCGAGTATGGGGAGGCCAGTGGGCGCGTTGAGCTAAGCATCACGAAGTTTGCCAAGTTCTGCGGGTATCCA  
TCTTCCCAGATACGCAAGACGCTGCGAGACAGGATCACGAACAGCCTGCTGAAGATAATGCGCACAACGCTTTCGTTCCAGCGCACATACGAAGAGAAGAAC  
GTGGACGGCTCGAACAAGATATCTCTGCTCATGGTTCATCTGGTGAATAGCGTGGATTACAATGAGAAAAATGACACCATCATATTTACGCCGAGCCAAAGCT  
GTCAGAGCTATACCGGTTTGACCACAAAGTTCTTCTCCAGCTGAAGGTCATCAACAACTTCCACGTAAAGAAACCGCCAGGGCGCTATACACCTTCATTGAA  
AGTCTTCCGGCGCGGCCGGCACCAATATCTCTGGCTCGTTTTCGTTGCGAGGTTGAATCTGAATAGCGCAAGCATCAGCTCCCAAATCAGACCATTGAAACG  
GTCTGAAGTCTCTTAAAGAGCTTGGCTACCTCGATTACTCAGAGGTGAAGCGTGGTCGCTCTGTATTTATTCAGATTCATGGACGCAACCCGAAACTTAAAGTC  
ATTGGTGAAGAGAAACCGTCAAGCCTGAGAAGCCTGTAGAGCAAGTGGAAGGGCCACAAGAGAACGGCGAGCTGGAAGTCGTAAAACAAAACATGATCA

AGAAGATAGCTGAACTTTCTGCGGATTTGACGCCTGAGAATATAAAGCTAATTGAGATACTTAGTAACGGTCTGAAGTTGCTTTGA

>pNDM-Mar (JN420336)

ATGGGATTCAACATTAACGGTTCGTATGTTTAGGATAGGAATGACTGTGAACAAGAAAACGGAAAAAATTAACAATGAAATCAAAGAACAAGCCGCATTCTCAT  
TCAATGTCGTAGGGGGTACGGGTAAAGTTACTAACTTTACCCCTGGTAACAATGGTACCGTTCAACCTGTTGCTTTGTTGAGGCTTGGGGTATTTGTCCCGGCC  
CCTCCGGGCGTAGCAAAGAAAAACCTCCCAGAGGGTTTGGTTACGATGGATGTGTCCCGCGATTTACAGCATATGCAGATCGCATCCAGTGAAGGCTACAAAG  
AAATATCGCTATCCAGCCCTCGTCTTGATATGGGGACAGATTTCCGTGTATGGCTTGGTATAGTCCGTTTCATTACATGACCATGGCCATTACTCAGGAAGGATTAA  
GCTTCCTTTTAGCACCTTCCTTAAAAATTGTGGGTTTGACCCCTCGAGGTGCAATAAGCCCATGAAACAACGTATCGATGCTTCGATGATTAAGTAAAATGG  
TCACTTTTCAGTTCCGCAATGAAGATTCAACCCCTCACGACCGGCCTCATTAAGTGGGCACGGTACAACATAAAAAACCAATGAGATTGAGATAGAGGGAGATCC  
CCGGATTACAGGAGCTCTATCAGATTGACTATAAGGTTTATCTTCGCCTTAAGGCTCTTGATAATCTGCAAAGGAAAGAGTCCGCCAGGCCTTGTATACCTACCT  
CGCCAGCCTACCTAAAGACCCTGCACCAATCTCAATGAAACGCTTTCGCGACCGTTTACGGCTAACGTCCCCAGTAGCCTCTCAGAACATGATCATTGCGCGTT  
CGTTGAAGGAGCTTGAGCAAATCGGTTACTTGCAATACAGAGAAGAGAAGATTGGTCGGTCAATAAAGTTCCACATACTTAAACGAAGTCCCTCGCTGGATGC  
CAAAAAGACCATCCTGGTCCCGGCTGCACATAACCCAGCTGATGACGATGCACTGATACATAAACTTAAAATGCTGAAGGCTGCAGGTTACTCAGAACTGAG  
ATTGCTGGCGTTCTGGATGCCCTCGATAAGTTGCAGAGGGAAGGAAAACCGGAATCCGAAGTCGAAGATGCCGATTTTGAGGAGCTTTAA

>pE20-HI3 (MG288682)

ATGGGATTCAACATTAACGGTTCGTATGTTTAGGATAGGAATGACTGTGAACAAGAAAACGGAAAAAATTAACAATGAAATCAAAGAACAAGCCGCATTCTCAT  
TCAATGTCGTAGGGGGTACGGGTAAAGTTACTAACTTTACCCCTGGTAACAATGGTACCGTTCAACCTGTTGCTTTGTTGAGGCTTGGGGTATTTGTCCCGGCC  
CCTCCGGGCGTAGCAAAGAAAAACCTCCCAGAGGGTTTGGTTACGATGGATGTGTCCCGCGATTTACAGCATATGCAGATCGCGTCCAGTGAAGGCTACAAAG  
AAATATCGCTATCCAGCCCTCGTCTTGATATGGGGACAGATTTCCGTGTATGGCTTGGTATAGTCCGTTTCATTACATGACCATGGCCATTACTCAGGAAGGATTAA  
GCTTCCTTTTAGCACCTTCCTTAAAAATTGTGGGTTTGACCCCTCGAGGTGCAATAAGCCCATGAAACAACGTATCGATGCTTCGATGATTAAGTAAAATGG  
TCACTTTTCAGTTCCGCAATGAAGATTCAACCCCTCACGACCGGCCTCATTAAGTGGGCACGGTACAACATAAAAAACCAATGAGATTGAGATAGAGGGAGATCC  
CCGGATTACAGGAGCTCTATCAGATTGACTATAAGGTTTATCTTCGCCTTAAGGCTCTTGATAATCTGCAAAGGAAAGAGTCCGCCAGGCCTTGTATACCTACCT  
CGCCAGCCTACCTAAAGACCCTGCACCAATCTCAATGAAACGCTTTCGCGACCGTTTACGGCTAACGTCCCCAGTAGCCTCTCAGAACATGATCATTGCGCGTT  
CGTTGAAGGAGCTTGAGCAAATCGGTTACTTGCAATACAGAGAAGAGAAGATTGGTCGGTCAATAAAGTTCCACATACTTAAACGAAGTCCCTCGCTGGATGC  
CAAAAAGACCATCCTGGTCCCGGCTGCACATAACCCAGCTGATGACGATGCACTGATACATAAACTTAAAATGCTGAAGGCTGCAGGTTACTCAGAACTGAG  
ATTGCTGGCGTTCTGGATGCCCTCGATAAGTTGCAGAGGGAAGGAAAACCGGAATCCGAAGTCGAAGATGCCGATTTTGAGGAGCTTTAA

>pENVA (HG918041)

ATGGGATTCAACATTAACGGTCGTATGTTTAGGATAGGAATGACTGTGAACAAGAAAACGGAAAAATTAACAATGAAATCAAAGAACAAGCCGCATTCTCAT  
TCAATGTCGTAGGGGGTACGGGTAAAGTTACTAACTTTACCCCTGGTAACAATGGTACCGTTCAACCTGTTGCTTTGTTGAGGCTTGGGGTATTTGTCCCGGCC  
CCTCCGGGCGTAGCAAAGAAAAACCTCCCAGAGGGTTTGGTTACGATGGATGTGTCACGCGATTTACAGCATATGCAGATCGCATCCAGTGAAGGCTACAAAG  
AAATATCGCTATCCAGCCCTCGTCTTGATATGGGGACAGATTTCCGTGTATGGCTTGGTATAGTCCGTTCTTTACATGACCATGGCCATTACTCAGGAAGGATTAA  
GCTTCCTTTTAGCACCTTCCTTAAAAATTGTGGGTTTGACCCCTCGAGGTGCAATAAGCCCATGAAACAACGTATCGATGCTTCGATGATTAAACTGAAAATGG  
TCACTTTTCAGTTCCGCAATGAAGATTCAACCCCTCACGACCGGCCTCATTAACTGGGCACGGTACAACATAAAAACCAATGAGATTGAGATAGAGGGAGATCC  
CCGGATTCAGGAGCTCTATCAGATTGACTATAAGGTTTATCTTCGCCTTAAGGCTCTTGATAACCTGCAAAGGAAAGAGTCCGCCAGGCCTTGATAACCTACCT  
CGCCAGCCTACCTAAAGACCCCGCACCAATCTCAATGAAACGCTTTCGCGACCGTTTACGGCTAACGTCCCCAGTAGCCTCTCAGAACATGATCATTGCGCGTT  
CGTTGAAGGAGCTTGAGCAAATCGGTTACTTGCAATACAGAGAAGAGAAGATTGGTCGGTCAATAAAGTTCCACATACTTAAACGAAGTCCCTCGCTGGATGC  
CAAAAAGACCATCCTGGTCCCGGCTGCACATAACCCAGCTGATGACGATGCACTGATACATAAACTTAAAATGCTGAAGGCTGCAGGTTACTCAGAACTGAG  
ATTGCTGGCGTTCTGGATGCCCTCGATAAGTTGCAGAGGGAAGGAAAACCGGAATCCGAAGTCGAAGATGCCGATTTTGAGGAGCTTTAA

>pKP18-31-IMP,KPC (MN661402)

GTGAAGAAAGTAAACAAAGAAATATCTAAAGATATCAGTGGGAAAGGTTATTTTTCTTTTGAAGTGACAGGACAAACAGGCAAAGTTACTCACTTCGCACCAG  
GGAACACAGGCACTGTCCAGCCCGTTGCGCTGCTAAGACTAGGGGTATTTGTCCCGACTCCCTTGGCTACAGGCAAACACGTTCCATTGATAAAGTTGTGAC  
TATGGACGTGTCAAACGAGCTCCAGCATATGGAGGTCGCTTCCAGTGAAGGGTACAAGGAGATCTCCCTATCTAGCCCCGGCTGGATATGAACACCGATTTTC  
GAGTCTGGCTGGGAATTGTCAGGACGATTCACGATTTAACGATGTCTCAGTTTCGGGAAGAATAAAATTACCTTTCTCAACGTTCTCAAAAACACTGTGGATTT  
GACCCGACACGATCGAATAAGCACATGAAAGCACGTATCGACGCCTCGATGGTTAAGCTAAGAATGGTGACATTTTCAGTTCAGAAACGAAGATTCCACGCTTA  
CTACCGGCCTGATAAACTGGGCACGTTATAACATCAAAACAAATGAGATCGAGATAGAAGGTGACCCCGCATCAAAGAGCTTTACGCGATTGATTATAAGGTT  
TTTTTGCGGCTTAAGGCACTGGACAGCTTACAACGAAAAGAGTCTGCACAGGCGTTGTATACCTATCTGGCGAGCTTGCCGAAGAACCCGGCCCAATCAGCA  
TGAAACGATTCCGAGACCGACTGCGGTTAACTTCCCACGTCTCCGCTCAGAATGAAATTATACGGCGCTCACTTCGTGAGCTACATGAGATAGGTTATCTGCAA  
TACCATGAAGAGAAGGTCGGTAGAAATATCAAATTTTCATATCCTAAAAAGAAGCCCATCTCTCGGTGCGAAAAAGGACCCTATTCAGGCACCGGCACAAAATG  
CCCCGATCCTGGATGACCCGTTGCTTGAAAACTGAAAATGATGAAAGCAGCTGGATTTACCGGCGAAGAGATTGCTGCAGTTCTTGTTCATCGATAAGATG  
AAAAAGATAACGGCAAGCATCATGATGAAGAGGCTGAAGACGCGGATTTTAGCGAGGAGTGA

>pA324-IMP (MF344566)

GTGAAGAAAGTAAACAAAGAAATATCTAAAGATATCAGTGGGAAAGGTTATTTTTCTTTTGAAGTGACAGGACAAACAGGCAAAGTTACTCACTTCGCACCAG  
GGAACACAGGCACTGTCCAGCCCGTTGCGCTGCTAAGACTAGGGGTATTTGTCCCGACTCCCTTGGCTACAGGCAAACACGTTCCATTGATAAAGTTGTGAC

TATGGACGTGTCAAACGAGCTCCAGCATATGGAGGTCGCTTCCAGTGAAGGGTACAAGGAGATCTCCCTATCTAGCCCCGGCTGGATATGAACACCGATTTTC  
GAGTCTGGCTGGGAATTGTCAGGACGATTCACGATTTTAACGATGTCTCAGTTTCGGGAAGAATAAAATTACCTTTCTCAACGTTCTCAAAAACGTGGATTT  
GACCCGACACGATCGAATAAGCACATGAAAGCACGTATCGACGCCTCGATGGTTAAGCTAAGAATGGTGACATTTTCAGTTCAGAAACGAAGATTCCACGCTTA  
CTACCGGCCTGATAAACTGGGCACGTTATAACATCAAAACAAATGAGATCGAGATAGAAGGTGACCCCCGCATCAAAGAGCTTTACGCGATTGATTATAAGGTT  
TTTTTTCGGCTTAAGGCACTGGACAGCTTACAACGAAAAGAGTCTGCACAGGCGTTGTATACCTATCTGGCGAGCTTGCCGAAGAACCCGGCCCCAATCAGCA  
TGAAACGATTCCGAGACCGACTGCGGTTAACTTCCCACGTCTCCGCTCAGAATGAAATTATACGGCGCTCACTTCGTGAGCTACATGAGATAGGTTATCTGCAA  
TACCATGAAGAGAAGGTCGGTAGAAATATCAAATTTTCATATCCTAAAAAGAAGCCCATCTCTCGGTGCGAAAAAGGACCCTATTCAGGCACCGGCACAAAATG  
CCCCGATCCTGGATGACCCGTTGCTTGAAAACTGAAAATGATGAAAGCAGCTGGATTTACCGGCGAAGAGATTGCTGCAGTTCTTGTTCATCGATAAGATG  
AAAAAGATAAACGGCAAGCATCATGATGAAGAGGCTGAAGACGCGGATTTTAGCGAGGAGTGA

>pKOX\_R1 (CP003684)

GTGAAGAAAGTAAACAAAGAAATATCTAAAGATATCAGTGGGAAAGGTTATTTTTCTTTTGAAGTGACAGGACAAACAGGCAAAGTTACTCACTTCGCACCAG  
GGAACACAGGCACTGTCCAGCCCGTTGCGCTGCTAAGACTAGGGGTATTTGTCCCGACTCCCTTGGCTACAGGCAAACACGTTCCATTGATAAAGTTGTGAC  
TATGGACGTGTCAAACGAGCTCCAGCATATGGAGGTCGCTTCCAGTGAAGGGTACAAGGAGATCTCCCTATCTAGCCCCGGCTGGATATGAACACCGATTTTC  
GAGTCTGGCTGGGAATTGTCAGGACGATTCACGATTTTAACGATGTCTCAGTTTCGGGAAGAATAAAATTACCTTTCTCAACGTTCTCAAAAACGTGGATTT  
GACCCGACACGATCGAATAAGCACATGAAAGCACGTATCGACGCCTCGATGGTTAAGCTAAGAATGGTGACATTTTCAGTTCAGAAACGAAGATTCCACGCTTA  
CTACCGGCCTGATAAACTGGGCACGTTATAACATCAAAACAAATGAGATCGAGATAGAAGGTGACCCCCGCATCAAAGAGCTTTACGCGATTGATTATAAGGTT  
TTTTTTCGGCTTAAGGCACTGGACAGCTTACAACGAAAAGAGTCTGCACAGGCGTTGTATACCTATCTGGCGAGCTTGCCGAAGAACCCGGCCCCAATCAGCA  
TGAAACGATTCCGAGACCGACTGCGGTTAACTTCCCACGTCTCCGCTCAGAATGAAATTATACGGCGCTCACTTCGTGAGCTACATGAGATAGGTTATCTGCAA  
TACCATGAAGAGAAGGTCGGTAGAAATATCAAATTTTCATATCCTAAAAAGAAGCCCATCTCTCGGTGCGAAAAAGGACCCTATTCAGGCACCGGCACAAAATG  
CCCCGATCCTGGATGACCCGTTGCTTGAAAACTGAAAATGATGAAAGCAGCTGGATTTACCGGCGAAGAGATTGCTGCAGTTCTTGTTCATCGATAAGATG  
AAAAAGATAAACGGCAAGCATCATGATGAAGAGGCTGAAGACGCGGATTTTAGCGAGGAGTGA

>pEC316\_2 (CP018955)

ATGTATAAGAAAAGTGTAGATCTATCACTTGAATCGGTTCTCGTAGAAATCGATGAAAATAAGAAGCTCATGCCTTCCAGAAACGCTACTGTCCAGCCTGTAGC  
TTTGATGCGCTTAGGTCTGTTTCTACCTTCTTAAAACGAAAAGGAAAGGATACAGAAAATATCAGTATTGATGCGAGTAACGAACCTCAAAGCTTAGAGTTGG  
CAAGAGCCGAAGGTTATACAGACATCCGTATTACCGGCCACGACTTTCGATGGAGACTGACTTCAAGGTGTGGGTTGGCATCATTCTCGGTTTTTCGAAATAT  
GGCTTAAACAGCAGCACCATTGAACTTCCATTCAGCGAGTTTGCTACATTATGCGGGTTTAGCTCAAAGGACAAAGATAAAGGACTCAGAACGCGCTTGGCCG

ACTCTCTTATTCGTCTTCGCAGCACAACTATCAAGCTTGCCTCAGAAAAGGATCGGAATGGTGTGTATCTGGTCTGTAAAGTCGTGGTAAGTGGGACGAAAA  
GACGACATCATGGAACCTACCGCCGATGAGTCTCTTTGGGAGCTTTATCAATTCGACCGTCAGGTGCTTCTGCAGATGTTATAATCCGGCAACTTGCGAACAA  
AGGGACAGCACAGGCCCTATACACTTTCATTGAGAGCCTTCCTGAGCGACCAATACCACTATCGTTCGCGCGTATTAAACGTGCGCTAATGCTTACCTCACCCA  
ATAACCAGCAGAATCGAGTGATTAACAAGGCTATAGACGAGCTTAAAGCGGTCGGTATTTAGATGGCGATGTCGTTAAAAAGGATGGTGAATGGCACTTAATC  
ATAACCCGTGCGACGCCTAGGCCAGACATTAAGGCTATGTCTGAAGCCTTAAAAGATGGAGAGTAA

>pRHBSTW-00204\_2 (CP056656)

ATGTATAAGAAAAGTGTAGATCTATCACTTGAATCGGTTCTCGTAGAAATCGATGAAAATAAGAAGCTCATGCCTTCCAGAAACGCTACTGTCCAGCCTGTAGC  
TTTGATGCGCTTAGGTCTGTTTCTACCTTCCTTAAAACGAAAAGGAAAGGATACAGAAAATATCAGTATTGATGCGAGTAACGAACTTCAAAGCTTAGAGTTGG  
CAAGAGCCGAAGGTTATACAGACATCCGTATTACCGGCCACGACTTTCGATGGAGACTGACTTCAAGGTGTGGGTTGGCATCATTCTCGCGTTTTCGAAATAT  
GGCTTAAACAGCAGCACCATTGAACTTCCATTCAGCGAGTTTGCTACATTATGCGGGTTTAGCTCAAAGGACAAAGATAAAGGACTCAGAACGCGCTTGGCCG  
ACTCTCTTATTCGTCTTCGCAGCACAACTATCAAGCTTGCCTCAGAAAAGGATCGGAATGGTGTGTATCTGGTCTGTAAAGTCGTGGTAAGTGGGACGAAAA  
GACGACATCATGGAACCTACCGCCGATGAGTCTCTTTGGGAGCTTTATCAATTCGACCGTCAGGTGCTTCTGCAGATGTTATAATCCGGCAACTTGCGAACAA  
AGGGACAGCACAGGCCCTATACACTTTCATTGAGAGCCTTCCTGAGCGACCAATACCACTATCGTTCGCGCGTATTAAACGTGCGCTAATGCTTACCTCACCCA  
ATAACCAGCAGAATCGAGTGATTAACAAGGCTATAGACGAGCTTAAAGCGGTCGGTATTTAGATGGCGATGTCGTTAAAAAGGATGGTGAATGGCACTTAATC  
ATAACCCGTGCGACGCCTAGGCCAGACATTAAGGCTATGTCTGAAGCCTTAAAAGATGGAGAGTAA

>pQil-IT (JN233705)

ATGTATAAGAAAAGTGTAGATCTATCACTTGAATCGGTTCTCGTAGAAATCGATGAAAATAAGAAGCTCATGCCTTCCAGAAACGCTACTGTCCAGCCTGTAGC  
TTTGATGCGCTTAGGTCTGTTTCTACCTTCCTTAAAACGAAAAGGAAAGGACACAGAAAATATCAGTATTGATGCGAGTAGCGAACTTCAAAGCTTAGAGTTG  
GCAAGAGCCGAAGGTTATACAGACATCCGTATTACCGGCCACGACTTTCGATGGAGACTGACTTCAAGGTGTGGGTTGGCATCATTCTCGCGTTTTCGAAATA  
TGGCTTAAACAGCAGCACCATTGAACTTCCATTCAGCGAGTTTGCTACATTCTGCGGGTTTAGCTCAAAGGACAAAGATAAAGGACTCAGAACGCGCTTGGCC  
GACTCTCTTATTCGTCTTCGCAGCACAACTATCAAGCTTGCCTCAGAAAAGGATCGGAATGGTGTGTATCTGGTCTGTAAAGTCGTGGTAAGTGGGACGAAAA  
AGACGACATCATGGAACCTACCGCCGATGAGTCTCTTTGGGAGCTTTATCAATTCGACCGTCAGGTGCTTCTGCAGATGTTATAATCCGGCAACTTGCGAACAA  
AAGGGACAGCACAGGCCCTATACACTTTCATTGAGAGCCTTCCTGAGCGACCAATACCACTATCGTTCGCGCGTATTAAACGTGCGCTAATGCTTACCTCACCC  
AATAACCAGCAGAATCGAGTGATTAACAAGGCTATAGACGAGCTTAAAGCGGTCGGTATTTAGATGGCGATGTCGTTAAAAAGGATGGTGAATGGCACTTAAT  
CATAACCCGTGCGACGCCTAGGCCAGACATTAAGGCTATGTCTGAAGCCTTAAAAGATGGAGAGTAA

**Table S4. Accessory modules in the 11 IncFIB single-replicon plasmids**

| IncFIB subtype | Plasmid      | Accessory modules                                            |                                                                                                                    |                                                                                             | The other accessory modules besides LAR                             |
|----------------|--------------|--------------------------------------------------------------|--------------------------------------------------------------------------------------------------------------------|---------------------------------------------------------------------------------------------|---------------------------------------------------------------------|
|                |              | Key loci within LAR                                          |                                                                                                                    |                                                                                             |                                                                     |
|                |              | Antibiotic resistance                                        | Heavy metal resistance                                                                                             | Metabolism                                                                                  |                                                                     |
| IncFIB-4.1     | pBJ20-tetA   | ARR <sub>pBJ20-tetA</sub>                                    | <i>sil-cop</i> region and $\Delta$ Tn6736 (containing type A <i>ars</i> locus)                                     |                                                                                             | ISK <sub>pn26</sub> , IS903B, IS1A, ISSen4 and Kl.pn.I5-like intron |
|                | p71221-mpH   | ARR <sub>p71221-mpH</sub>                                    | <i>sil-cop</i> region and $\Delta$ Tn6736 (containing type A <i>ars</i> locus)                                     |                                                                                             | IS903B, IS1A, ISSen4 and Kl.pn.I5-like intron                       |
|                | pW08291-tetA | ARR <sub>pW08291-tetA</sub>                                  | <i>sil-cop</i> region and $\Delta$ Tn6736 (containing type A <i>ars</i> locus)                                     |                                                                                             | ISK <sub>pn26</sub> , IS903B, IS1A, ISSen4 and Kl.pn.I5-like intron |
|                | pA2508-emrE  | ARR <sub>pA2508-emrE</sub> ( $\Delta$ Tn6535)                | <i>sil-cop</i> region, type D <i>ars</i> locus and ARR <sub>pA2508-emrE</sub> (containing type E <i>ars</i> locus) | <i>phn</i> locus, <i>urt</i> locus, <i>fec</i> locus, <i>lac</i> locus and <i>gsi</i> locus |                                                                     |
|                | pL21-1NR     |                                                              | Truncated <i>sil-cop</i> region, type B <i>ars</i> locus and Tn6736                                                | K-antigen gene cluster                                                                      |                                                                     |
|                | pSC138       | ARR-1 <sub>pSC138</sub> and ARR-2 <sub>pSC138</sub> (Tn6092) |                                                                                                                    |                                                                                             |                                                                     |
| IncFIB-4.2     | p10057-catA  | ARR <sub>p10057-catA</sub>                                   | ARR <sub>p10057-catA</sub> (containing type E <i>ars</i> locus)                                                    | <i>hut</i> locus and $\Delta$ <i>lac</i> locus                                              |                                                                     |
|                | p13294-1NR   |                                                              | Tn6755 (containing type C <i>ars</i> locus and <i>sil-cop</i> region)                                              | <i>ehu</i> locus, <i>gsi</i> locus and Tn6755 (containing <i>phn</i> locus)                 |                                                                     |
|                | pA1876-NR    |                                                              | Truncated <i>sil-cop</i> region                                                                                    | $\Delta$ <i>ehu</i> locus and <i>gsi</i> locus                                              |                                                                     |
|                | pA2359-IMP   | ARR <sub>pA2359-IMP</sub> (Tn6382)                           | ARR <sub>pA2359-IMP</sub> (containing <i>mer</i> locus)                                                            | <i>fec</i> locus, <i>lac</i> locus and <i>hut</i> locus                                     |                                                                     |
|                | pFB2.3       |                                                              | <i>sil-cop</i> region, and type C and D <i>ars</i> loci                                                            | $\Delta$ <i>ehu</i> locus                                                                   |                                                                     |

**Table S5. Resistance genes in the 11 IncFIB single-replicon plasmids**

| IncFIB subtype | Plasmid      | Resistance marker           | Resistance phenotype                    | Nucleotide position          | Region located             |
|----------------|--------------|-----------------------------|-----------------------------------------|------------------------------|----------------------------|
| IncFIB-4.1     | pBJ20-tetA   | <i>sil</i>                  | Silver resistance                       | 17793..27670<br>28574..31021 | <i>sil-cop</i> region      |
|                |              | <i>cop</i>                  | Copper resistance                       | 32319..39851                 |                            |
|                |              | Type A <i>ars</i> locus     | Arsenic resistance                      | 55638..60371                 | $\Delta$ Tn6736            |
|                |              | <i>tetA(A)</i>              | Tetracycline resistance                 | 91288..92487                 | ARR <sub>pBJ20-tetA</sub>  |
|                |              | <i>dfrA1</i>                | Trimethoprim resistance                 | 93720..94193                 |                            |
|                |              | <i>qacED1</i>               | Quaternary ammonium compound resistance | 94897..95244                 |                            |
|                |              | <i>sul1</i>                 | Sulphonamide resistance                 | 95238..96077                 |                            |
|                |              | <i>mph(A)</i>               | Macrolide resistance                    | 100288..101193               |                            |
|                |              | <i>aphA1</i>                | Aminoglycoside resistance               | 102170..102985               |                            |
|                |              | <i>bla<sub>SHV-12</sub></i> | $\beta$ -lactam resistance              | 106570..107430               |                            |
|                |              | <i>qnrS1</i>                | Quinolone resistance                    | 111439..112095               |                            |
|                |              | <i>bla<sub>LAP-2</sub></i>  | $\beta$ -lactam resistance              | 113692..114549               |                            |
|                |              | <i>tmrB</i>                 | Tunicamycin resistance                  | 118881..119423               |                            |
|                | <i>aacC2</i> | Aminoglycoside resistance   | 119436..120296                          |                              |                            |
|                | p71221-mphA  | <i>bla<sub>SHV-12</sub></i> | $\beta$ -lactam resistance              | 23293..24153                 | ARR <sub>p71221-mphA</sub> |
|                |              | <i>aphA1</i>                | Aminoglycoside resistance               | 27738..28553                 |                            |
|                |              | <i>mph(A)</i>               | Macrolide resistance                    | 29530..30435                 |                            |
|                |              | <i>sul1</i>                 | Sulphonamide resistance                 | 34646..35485                 |                            |
|                |              | <i>qacED1</i>               | Quaternary ammonium compound resistance | 35479..35826                 |                            |



|        |                |                             |                                         |                           |                                                  |                       |
|--------|----------------|-----------------------------|-----------------------------------------|---------------------------|--------------------------------------------------|-----------------------|
|        |                | <i>dfrA1</i>                | Trimethoprim resistance                 | 36530..37003              | $\Delta$ Tn6736                                  |                       |
|        |                | <i>tetA(A)</i>              | Tetracycline resistance                 | 38236..39435              |                                                  |                       |
|        |                | Type A <i>ars</i> locus     | <b>Arsenic</b> resistance               | 69525..74258              |                                                  |                       |
|        |                | <i>sil</i>                  | Silver resistance                       | 16867..19162              |                                                  | <i>sil-cop</i> region |
|        |                | <i>cop</i>                  | Copper resistance                       | 99941..110096             |                                                  |                       |
|        | pW08291-tetA   | <i>sil</i>                  | <i>sil</i>                              | Silver resistance         | 18062..30513                                     | <i>sil-cop</i> region |
|        |                |                             | <i>cop</i>                              | Copper resistance         | 31810..39340                                     |                       |
|        |                |                             | Type A <i>ars</i> locus                 | <b>Arsenic</b> resistance | 55128..59862                                     |                       |
|        |                | <i>tetA(A)</i>              | Tetracycline resistance                 | 89487..90686              | ARR <sub>pW08291-tetA</sub>                      |                       |
|        |                | <i>dfrA1</i>                | Trimethoprim resistance                 | 91919..92392              |                                                  |                       |
|        |                | <i>qacED1</i>               | Quaternary ammonium compound resistance | 93096..93443              |                                                  |                       |
|        |                | <i>sulI</i>                 | Sulphonamide resistance                 | 93437..94276              |                                                  |                       |
|        |                | <i>mph(A)</i>               | Macrolide resistance                    | 98487..99392              |                                                  |                       |
|        |                | <i>bla<sub>SHV-12</sub></i> | $\beta$ -lactam resistance              | 102909..103769            |                                                  |                       |
|        | pA2508-emrE    | <i>emrE</i>                 | Quaternary ammonium compound resistance | 140434..140766            | ARR <sub>pA2508-emrE</sub><br>( $\Delta$ Tn6535) |                       |
|        |                | Type E <i>ars</i> locus     | <b>Arsenic</b> resistance               | 147522..150841            |                                                  |                       |
|        | pL21-1NR       | <i>cop</i>                  | Copper resistance                       | 33412..36192              | <i>sil-cop</i> region                            |                       |
|        |                | <i>sil</i>                  | Silver resistance                       | 45370..57816              |                                                  |                       |
|        |                | Type A <i>ars</i> locus     | <b>Arsenic</b> resistance               | 106416..111159            | Tn6736                                           |                       |
|        |                | Type B <i>ars</i> locus     | <b>Arsenic</b> resistance               | 118041..122346            | Type B <i>ars</i> locus                          |                       |
| pSC138 | <i>tetA(A)</i> | Tetracycline resistance     | 23877..25076                            | ARR-1 <sub>pSC138</sub>   |                                                  |                       |
|        | <i>catA2</i>   | Phenicol resistance         | 31377..32018                            |                           |                                                  |                       |

|             |                                         |                              |                                         |                                                    |                            |
|-------------|-----------------------------------------|------------------------------|-----------------------------------------|----------------------------------------------------|----------------------------|
|             |                                         | <i>bla</i> <sub>TEM-1</sub>  | β-lactam resistance                     | 36180..37041                                       |                            |
|             |                                         | <i>aphA1</i>                 | Aminoglycoside resistance               | 42500..43261                                       |                            |
|             |                                         | <i>dfrA12</i>                | Trimethoprim resistance                 | 45941..46438                                       |                            |
|             |                                         | <i>aadA2</i>                 | Aminoglycoside resistance               | 46858..47637<br>63491..64270                       |                            |
|             |                                         | <i>qacED1</i>                | Quaternary ammonium compound resistance | 47801..48148                                       |                            |
|             |                                         | <i>sul1</i>                  | Sulphonamide resistance                 | 48142..48981                                       |                            |
|             |                                         | <i>sul3</i>                  | Sulphonamide resistance                 | 58613..59404                                       |                            |
|             |                                         | <i>qacH2</i>                 | Quaternary ammonium compound resistance | 60584..60916                                       |                            |
|             |                                         | <i>aadA1a</i>                | Aminoglycoside resistance               | 61086..61877                                       |                            |
|             |                                         | <i>cmlA1</i>                 | Phenicol resistance                     | 61970..63229                                       |                            |
|             |                                         | <i>bla</i> <sub>CMY-2</sub>  | β-lactam resistance                     | 91413..92558                                       |                            |
| <i>sugE</i> | Quaternary ammonium compound resistance | 93182..93662                 |                                         |                                                    |                            |
| IncFIB-4.2  | p10057-catA                             | <i>dfrA12</i>                | Trimethoprim resistance                 | 111171..111668                                     | ARR <sub>p10057-catA</sub> |
|             |                                         | <i>qacED1</i>                | Quaternary ammonium compound resistance | 114369..114716<br>171860..172207                   |                            |
|             |                                         | <i>sul1</i>                  | Sulphonamide resistance                 | 114710..115549<br>142113..142952<br>172201..173040 |                            |
|             |                                         | <i>chrA</i>                  | Chromate resistance                     | 117363..118568                                     |                            |
|             |                                         | <i>mph(A)</i>                | Macrolide resistance                    | 122187..123092                                     |                            |
|             |                                         | <i>bla</i> <sub>SHV-12</sub> | β-lactam resistance                     | 124055..124915                                     |                            |
|             |                                         | <i>mph(E)</i>                | Macrolide resistance                    | 133281..134165                                     |                            |

|  |            |                              |                                                       |                                  |                                       |
|--|------------|------------------------------|-------------------------------------------------------|----------------------------------|---------------------------------------|
|  |            | <i>msr(E)</i>                | Macrolide, Lincosamide and Streptogramin B resistance | 134221..135696                   |                                       |
|  |            | <i>armA</i>                  | Aminoglycoside resistance                             | 137995..138768                   |                                       |
|  |            | <i>bla<sub>DHA-1</sub></i>   | $\beta$ -lactam resistance                            | 144529..145668                   |                                       |
|  |            | <i>qnrB4</i>                 | Quinolone resistance                                  | 149789..150436                   |                                       |
|  |            | <i>catA1</i>                 | Phenicol resistance                                   | 161047..161706<br>193016..193675 |                                       |
|  |            | <i>aacA4cr</i>               | Aminoglycoside resistance                             | 168770..169369                   |                                       |
|  |            | <i>bla<sub>OXA-1</sub></i>   | $\beta$ -lactam resistance                            | 169500..170330                   |                                       |
|  |            | <i>catB3</i>                 | Phenicol resistance                                   | 170468..171100                   |                                       |
|  |            | <i>arr3</i>                  | Rifampin resistance                                   | 171185..171637                   |                                       |
|  |            | Type E <i>ars</i> locus      | <b>Arsenic</b> resistance                             | 176865..180184                   |                                       |
|  |            | <i>tetA(D)</i>               | Tetracycline resistance                               | 190157..191341                   |                                       |
|  |            | <i>strA</i>                  | Aminoglycoside resistance                             | 196060..196863                   |                                       |
|  |            | <i>strB</i>                  | Aminoglycoside resistance                             | 196869..197699                   |                                       |
|  |            | <i>sul2</i>                  | Sulphonamide resistance                               | 202363..203178                   |                                       |
|  | p13294-1NR | Type C <i>ars</i> locus      | <b>Arsenic</b> resistance                             | 67507..71815                     | Type C <i>ars</i> locus               |
|  |            | <i>sil</i>                   | Silver resistance                                     | 75572.. 88023                    | <i>sil-cop</i> region                 |
|  |            | <i>cop</i>                   | Copper resistance                                     | 89321..96862                     |                                       |
|  | pA1876-NR  | <i>sil</i>                   | Silver resistance                                     | 42634..55085                     | <i>sil-cop</i> region                 |
|  |            | <i>cop</i>                   | Copper resistance                                     | 56383..59779                     |                                       |
|  | pA2359-IMP | <i>mer</i> locus             | Mercuric resistance                                   | 4732..8235                       | ARR <sub>pA2359-IMP</sub><br>(Tn6382) |
|  |            | <i>bla<sub>TEM-1</sub></i>   | $\beta$ -lactam resistance                            | 12141..13001                     |                                       |
|  |            | <i>bla<sub>CTX-M-3</sub></i> | $\beta$ -lactam resistance                            | 13783..14658                     |                                       |
|  |            | <i>aacA4</i>                 | Aminoglycoside resistance                             | 16727..17281                     |                                       |

|  |        |                             |                                         |                |                         |
|--|--------|-----------------------------|-----------------------------------------|----------------|-------------------------|
|  |        | <i>qacED1</i>               | Quaternary ammonium compound resistance | 17408..17740   |                         |
|  |        | <i>bla<sub>IMP-38</sub></i> | β-lactam resistance                     | 17972..18712   |                         |
|  | pFB2.3 | Type C <i>ars</i> locus     | <b>Arsenic</b> resistance               | 33901..38209   | Type C <i>ars</i> locus |
|  |        | <i>sil</i>                  | Silver resistance                       | 43981..66193   | <i>sil-cop</i> region   |
|  |        | <i>cop</i>                  | Copper resistance                       | 67491..70746   |                         |
|  |        | Type D <i>ars</i> locus     | <b>Arsenic</b> resistance               | 109803..112679 | Type D <i>ars</i> locus |

**Table S6. Pairwise comparison of backbone sequences of the 11 IncFIB single-replicon plasmids using BLASTN**

| (coverage+identity), % | pBJ20-tetA | p71221-mphA | pW08291-tetA | pA2508-emrE | pL21-1NR | pSC138    | p10057-catA | p13294-1NR | pA1876-NR | pA2359-IMP | pFB2.3   |
|------------------------|------------|-------------|--------------|-------------|----------|-----------|-------------|------------|-----------|------------|----------|
| pBJ20-tetA             |            | (100+100)   | (94+100)     | (72+96)     | (89+97)  | (89+97)   | (75+89)     | (75+89)    | (75+89)   | (84+89)    | (86+89)  |
| p71221-mphA            | (100+100)  |             | (100+100)    | (78+97)     | (89+97)  | (89+97)   | (75+89)     | (75+89)    | (75+89)   | (84+89)    | (86+89)  |
| pW08291-tetA           | (100+100)  | (100+100)   |              | (78+97)     | (89+97)  | (89+97)   | (75+89)     | (75+89)    | (75+89)   | (84+89)    | (86+89)  |
| pA2508-emrE            | (64+96)    | (64+96)     | (66+97)      |             | (100+98) | (100+97)  | (80+89)     | (80+89)    | (79+89)   | (89+89)    | (92+89)  |
| pL21-1NR               | (27+97)    | (27+97)     | (26+97)      | (35+98)     |          | (100+100) | (68+90)     | (67+90)    | (66+90)   | (75+90)    | (79+90)  |
| pSC138                 | (27+97)    | (27+97)     | (25+97)      | (35+97)     | (98+100) |           | (68+90)     | (67+90)    | (66+90)   | (75+90)    | (79+90)  |
| p10057-catA            | (26+89)    | (26+89)     | (24+89)      | (32+89)     | (76+90)  | (77+90)   |             | (100+99)   | (100+99)  | (100+99)   | (99+99)  |
| p13294-1NR             | (26+89)    | (26+89)     | (24+89)      | (32+89)     | (75+90)  | (76+90)   | (100+99)    |            | (100+100) | (100+99)   | (99+99)  |
| pA1876-NR              | (26+89)    | (26+89)     | (24+89)      | (32+89)     | (75+90)  | (76+90)   | (100+99)    | (100+100)  |           | (100+99)   | (99+99)  |
| pA2359-IMP             | (26+89)    | (26+89)     | (24+89)      | (32+89)     | (75+90)  | (76+90)   | (89+99)     | (89+99)    | (88+99)   |            | (100+99) |
| pFB2.3                 | (26+89)    | (26+89)     | (24+89)      | (32+89)     | (76+90)  | (77+90)   | (89+99)     | (84+99)    | (84+99)   | (94+99)    |          |
